# Supplementary material for: Regio-selective synthesis of diversely substituted benzo[a]carbazoles through Rh(iii)-catalyzed annulation of 2-arylindoles with α-diazo carbonyl compounds
Source: Royal Society of Chemistry journal article supplement (doi:10.1039/c6cc08377c), 2016-12-22
Supplement: c6cc08377c1.pdf [file c6cc08377c1.pdf]

## Supporting Information

# Regio-selective synthesis of diversely substituted benzo[*a*]carbazoles through Rh(III)-catalyzed annulation of 2-arylindoles with $\alpha$ -diazo carbonyl compounds

Bin Li, Beibei Zhang, Xinying Zhang\* and Xuesen Fan\*

*School of Chemistry and Chemical Engineering, School of Environment, Collaborative Innovation Centre of Henan Province for Green Manufacturing of Fine Chemicals, Key Laboratory of Green Chemical Media and Reactions, Ministry of Education, Henan Normal University, Xinxiang, Henan 453007, P. R. China.*

*E-mail: xuesen.fan@htu.cn; xinyingzhang@htu.cn*

### Contents

|            |                                                                              |       |
|------------|------------------------------------------------------------------------------|-------|
| <b>I</b>   | General experimental information                                             | 2     |
| <b>II</b>  | Experimental procedures and spectroscopic data                               | 3-14  |
| <b>III</b> | Mechanism studies                                                            | 15-20 |
| <b>IV</b>  | Copies of $^1\text{H}$ and $^{13}\text{C}$ NMR spectra of <b>3a-3y</b>       | 21-45 |
| <b>V</b>   | Copies of $^1\text{H}$ and $^{13}\text{C}$ NMR spectra of <b>5a-5h</b>       | 46-53 |
| <b>VI</b>  | Copies of $^1\text{H}$ and $^{13}\text{C}$ NMR spectra of <b>5i, 7 and 8</b> | 54-56 |
| <b>VII</b> | References                                                                   | 57    |

## I. General experimental information

All the commercial reagents were used without further purification. 2-Aryl-1*H*-indoles (**1**),<sup>1</sup>  $\alpha$ -diazo carbonyl compounds (**2**),<sup>2,3</sup> 2-aryl-1*H*-indole-3-carbonitriles (**4**),<sup>4</sup> and [RhCp\*Cl<sub>2</sub>]<sub>2</sub><sup>5</sup> were prepared according to literature procedures. Melting points were recorded with a micro melting point apparatus and uncorrected. The <sup>1</sup>H NMR spectra were recorded at 400 MHz or 600 MHz. The <sup>13</sup>C NMR spectra were recorded at 100 MHz or 150 MHz. Chemical shifts were expressed in parts per million ( $\delta$ ) downfield from the internal standard tetramethylsilane, and were reported as s (singlet), d (doublet), t (triplet), q (quadruple), dd (doublet of doublet), m (multiplet), etc. The coupling constants *J* were given in Hz. High resolution mass spectra (HRMS) were obtained *via* ESI mode by using a MicrOTOF mass spectrometer. The conversion of starting materials was monitored by thin layer chromatography (TLC) using silica gel plates (silica gel 60 F254 0.25 mm), and components were visualized by observation under UV light (254 and 365 nm).

## II. Experimental procedures and spectroscopic data

### 1. General synthetic procedure and spectroscopic data of 3a-3y.

2-Aryl-1*H*-indole (**1**, 0.5 mmol),  $\alpha$ -diazo carbonyl compound (**2**, 0.75 mmol), [RhCp\*Cl<sub>2</sub>]<sub>2</sub> (0.025 mmol), Cu(OAc)<sub>2</sub> (0.05 mmol), and CH<sub>3</sub>CN (3 mL) were charged into a sealed tube. The mixture was then stirred at 120 °C. Upon completion, it was cooled to room temperature, quenched with saturated brine (10 mL) and extracted with EtOAc (10 mL  $\times$  3). The combined organic phase was dried over anhydrous Na<sub>2</sub>SO<sub>4</sub>, and concentrated under reduced pressure. The residue was purified by silica gel chromatography using petroleum ether/ethyl acetate (10:1) as eluent to afford **3**.

**Ethyl 6-phenyl-11*H*-benzo[*a*]carbazole-5-carboxylate (3a):** Eluent: petroleum ether-ethyl acetate (10:1); white solid (130 mg, 71%); mp: 168-169 °C; <sup>1</sup>H NMR (600 MHz, CDCl<sub>3</sub>)  $\delta$ : 0.96 (t, *J* = 7.2 Hz, 3H), 4.12 (q, *J* = 7.2 Hz, 2H), 6.90 (d, *J* = 8.4 Hz, 1H), 6.99 (t, *J* = 7.8 Hz, 1H), 7.35 (t, *J* = 7.8 Hz, 1H), 7.51-7.55 (m, 6H), 7.57-7.61 (m, 2H), 8.14-8.15 (m, 1H), 8.17-8.18 (m, 1H), 9.06 (br s, 1H). <sup>13</sup>C NMR (150 MHz, CDCl<sub>3</sub>)  $\delta$ : 13.8, 61.4, 111.3, 116.4, 119.9, 120.2, 121.1, 121.8, 123.2, 124.0, 124.9, 125.7, 126.0, 126.6, 128.0, 128.4, 128.8, 129.5, 135.4, 136.0, 139.1, 139.3, 170.5. HRMS calcd for C<sub>25</sub>H<sub>19</sub>NNaO<sub>2</sub>: 388.1308 [M+Na]<sup>+</sup>, found: 388.1307.

**Ethyl 6-phenyl-3-(trifluoromethyl)-11*H*-benzo[*a*]carbazole-5-carboxylate (3b):** Eluent: petroleum ether-ethyl acetate (10:1); white solid (149 mg, 69%); mp: 200-201 °C; <sup>1</sup>H NMR (600 MHz, CDCl<sub>3</sub>)  $\delta$ : 0.97 (t, *J* = 7.2 Hz, 3H), 4.15 (q, *J* = 7.2 Hz, 2H), 6.88 (d, *J* = 8.4 Hz, 1H), 7.00-7.02 (m, 1H), 7.37-7.39 (m, 1H), 7.50-7.57 (m, 6H), 7.74 (dd, *J*<sub>1</sub> = 8.4 Hz, *J*<sub>2</sub> = 1.8 Hz, 1H), 8.26 (d, *J* = 9.0 Hz, 1H), 8.47 (s, 1H), 9.25 (br s, 1H). <sup>13</sup>C NMR (150 MHz, CDCl<sub>3</sub>)  $\delta$ : 13.7, 61.4, 111.2, 118.3, 120.5, 121.3, 121.5 (q, <sup>3</sup>*J*<sub>C-F</sub> = 2.55 Hz), 121.7, 122.2, 123.8, 123.9, 124.2 (q, <sup>3</sup>*J*<sub>C-F</sub> = 4.5 Hz), 124.4 (q, <sup>1</sup>*J*<sub>C-F</sub> = 269.55 Hz), 125.8, 127.8, 128.16 (q, <sup>2</sup>*J*<sub>C-F</sub> = 33.3 Hz),

128.19, 128.5, 129.2, 135.0, 136.9, 138.7, 139.1, 169.2. HRMS calcd for  $C_{26}H_{18}F_3NNaO_2$ : 456.1182  $[M+Na]^+$ , found: 456.1180.

**Ethyl 3-fluoro-6-phenyl-11H-benzo[a]carbazole-5-carboxylate (3c):** Eluent: petroleum ether-ethyl acetate (10:1); white solid (130 mg, 68%); mp: 151-152 °C;  $^1H$  NMR (600 MHz,  $CDCl_3$ )  $\delta$ : 0.94 (t,  $J = 7.2$  Hz, 3H), 4.11 (q,  $J = 7.2$  Hz, 2H), 6.85 (d,  $J = 7.8$  Hz, 1H), 6.97 (dd,  $J_1 = 7.8$  Hz,  $J_2 = 0.6$  Hz, 1H), 7.28-7.34 (m, 2H), 7.49-7.52 (m, 6H), 7.81 (dd,  $J_1 = 10.8$  Hz,  $J_2 = 1.8$  Hz, 1H), 8.11 (dd,  $J_1 = 9.0$  Hz,  $J_2 = 5.4$  Hz, 1H), 9.16 (br s, 1H).  $^{13}C$  NMR (150 MHz,  $CDCl_3$ )  $\delta$ : 13.7, 61.2, 110.6 (d,  $^2J_{C-F} = 22.05$  Hz), 111.0, 115.6 (d,  $^2J_{C-F} = 24.9$  Hz), 116.3, 117.0, 120.3, 121.8, 122.8 (d,  $^4J_{C-F} = 4.8$  Hz), 123.0 (d,  $^3J_{C-F} = 9.3$  Hz), 124.0, 125.1, 128.0, 128.4, 129.2, 130.2 (d,  $^3J_{C-F} = 9.15$  Hz), 135.8, 136.9, 138.9, 139.0, 161.2 (d,  $^1J_{C-F} = 244.35$  Hz), 169.5. HRMS calcd for  $C_{25}H_{19}FNO_2$ : 384.1394  $[M+H]^+$ , found: 384.1406.

**Ethyl 3-chloro-6-phenyl-11H-benzo[a]carbazole-5-carboxylate (3d):** Eluent: petroleum ether-ethyl acetate (10:1); white solid (142 mg, 71%); mp: 134-135 °C;  $^1H$  NMR (600 MHz,  $CDCl_3$ )  $\delta$ : 0.94 (t,  $J = 7.2$  Hz, 3H), 4.12 (q,  $J = 7.2$  Hz, 2H), 6.86 (d,  $J = 8.4$  Hz, 1H), 6.97-6.99 (m, 1H), 7.32-7.35 (m, 1H), 7.45 (dd,  $J_1 = 8.4$  Hz,  $J_2 = 1.8$  Hz, 1H), 7.49-7.52 (m, 6H), 8.03 (d,  $J = 9.0$  Hz, 1H), 8.12 (d,  $J = 1.8$  Hz, 1H), 9.16 (br s, 1H).  $^{13}C$  NMR (150 MHz,  $CDCl_3$ )  $\delta$ : 13.7, 61.3, 111.1, 116.9, 118.2, 120.3, 121.9, 122.2, 122.6, 123.9, 125.3, 125.4, 126.4, 128.1, 128.4, 129.2, 129.7, 132.5, 135.5, 136.7, 138.9, 139.0, 169.5. HRMS calcd for  $C_{25}H_{19}ClNO_2$ : 400.1099  $[M+H]^+$ , found: 400.1108.

**Ethyl 3-bromo-6-phenyl-11H-benzo[a]carbazole-5-carboxylate (3e):** Eluent: petroleum ether-ethyl acetate (10:1); white solid (164 mg, 74%); mp: 144-145 °C;  $^1H$  NMR (600 MHz,  $CDCl_3$ )  $\delta$ : 0.94 (t,  $J = 7.2$  Hz, 3H), 4.12 (q,  $J = 7.2$  Hz, 2H), 6.84 (d,  $J = 7.8$  Hz, 1H), 6.95-6.98 (m, 1H), 7.31 (td,  $J_1 = 7.2$  Hz,  $J_2 = 1.2$  Hz, 1H), 7.45-7.51 (m, 7H), 7.89 (d,  $J = 9.0$  Hz, 1H), 8.26 (d,  $J = 1.8$  Hz, 1H), 9.26 (br s, 1H).  $^{13}C$  NMR (150 MHz,  $CDCl_3$ )  $\delta$ : 13.7, 61.4, 111.2, 116.9, 118.5, 120.3, 120.7, 121.9, 122.3, 122.4, 123.9, 125.3, 128.1, 128.4, 128.5,

128.9, 129.2, 130.0, 135.5, 136.6, 138.9, 139.0, 169.6. HRMS calcd for C<sub>25</sub>H<sub>18</sub>BrNNaO<sub>2</sub>: 466.0413 [M+Na]<sup>+</sup>, found: 466.0393.

**Ethyl 3-methyl-6-phenyl-11H-benzo[*a*]carbazole-5-carboxylate (3f):** Eluent: petroleum ether-ethyl acetate (10:1); white solid (144 mg, 76%); mp: 206-207 °C; <sup>1</sup>H NMR (600 MHz, CDCl<sub>3</sub>) δ: 0.94 (t, *J* = 7.2 Hz, 3H), 2.51 (s, 3H), 4.11 (q, *J* = 7.2 Hz, 2H), 6.88 (d, *J* = 7.8 Hz, 1H), 6.97 (td, *J*<sub>1</sub> = 7.8 Hz, *J*<sub>2</sub> = 1.2 Hz, 1H), 7.31-7.33 (m, 1H), 7.40 (dd, *J*<sub>1</sub> = 8.4 Hz, *J*<sub>2</sub> = 1.2 Hz, 1H), 7.50-7.55 (m, 6H), 7.88 (s, 1H), 8.04 (d, *J* = 8.4 Hz, 1H), 9.03 (br s, 1H). <sup>13</sup>C NMR (150 MHz, CDCl<sub>3</sub>) δ: 13.7, 22.0, 61.0, 110.9, 116.0, 118.1, 120.0, 120.5, 121.8, 123.1, 124.3, 124.8, 125.4, 127.9, 128.3, 129.2, 129.4, 135.2, 135.8, 136.5, 138.8, 139.3, 170.0. HRMS calcd for C<sub>26</sub>H<sub>21</sub>NNaO<sub>2</sub>: 402.1465 [M+Na]<sup>+</sup>, found: 402.1455.

**Ethyl 3-methoxy-6-phenyl-11H-benzo[*a*]carbazole-5-carboxylate (3g):** Eluent: petroleum ether-ethyl acetate (10:1); white solid (144 mg, 73%); mp: 206-207 °C; <sup>1</sup>H NMR (400 MHz, CDCl<sub>3</sub>) δ: 0.94 (t, *J* = 7.2 Hz, 3H), 3.82 (s, 3H), 4.11 (q, *J* = 7.2 Hz, 2H), 6.83 (d, *J* = 8.4 Hz, 1H), 6.94 (td, *J*<sub>1</sub> = 7.2 Hz, *J*<sub>2</sub> = 0.8 Hz, 1H), 7.08 (dd, *J*<sub>1</sub> = 9.2 Hz, *J*<sub>2</sub> = 2.4 Hz, 1H), 7.24-7.28 (m, 1H), 7.42 (d, *J* = 8.4 Hz, 1H), 7.48-7.53 (m, 6H), 7.95 (d, *J* = 9.2 Hz, 1H), 9.16 (br s, 1H). <sup>13</sup>C NMR (150 MHz, CDCl<sub>3</sub>) δ: 13.7, 55.3, 61.1, 105.6, 111.0, 115.1, 115.2, 117.4, 119.9, 121.6, 122.2, 122.4, 124.2, 124.6, 127.9, 128.3, 129.3, 130.5, 136.30, 136.35, 138.9, 139.5, 158.3, 170.4. HRMS calcd for C<sub>26</sub>H<sub>22</sub>NO<sub>3</sub>: 396.1594 [M+H]<sup>+</sup>, found: 396.1579.

**Ethyl 1-chloro-6-phenyl-11H-benzo[*a*]carbazole-5-carboxylate (3h):** Eluent: petroleum ether-ethyl acetate (10:1); white solid (140 mg, 70%); mp: 164-165 °C; <sup>1</sup>H NMR (400 MHz, CDCl<sub>3</sub>) δ: 0.95 (t, *J* = 7.2 Hz, 3H), 4.10 (q, *J* = 7.2 Hz, 2H), 6.84 (d, *J* = 8.0 Hz, 1H), 6.99 (d, *J* = 8.0 Hz, 1H), 7.35-7.39 (m, 1H), 7.43-7.47 (m, 1H), 7.53 (s, 5H), 7.59 (d, *J* = 8.4 Hz, 1H), 7.62 (d, *J* = 7.6 Hz, 1H), 8.03 (dd, *J*<sub>1</sub> = 8.8 Hz, *J*<sub>2</sub> = 0.8 Hz, 1H), 10.50 (br s, 1H). <sup>13</sup>C NMR (150 MHz, CDCl<sub>3</sub>) δ: 13.7, 61.2, 111.3, 118.1, 118.2, 120.1, 121.9, 122.6, 124.2, 125.41, 125.43, 126.0, 127.4, 128.2, 128.5, 128.9, 129.4, 131.0, 134.1, 135.9, 138.3, 138.6, 169.5. HRMS calcd for C<sub>25</sub>H<sub>19</sub>ClNO<sub>2</sub>: 400.1099 [M+H]<sup>+</sup>, found: 400.1090.

**Ethyl 1-methyl-6-phenyl-11*H*-benzo[*a*]carbazole-5-carboxylate (3i):** Eluent: petroleum ether-ethyl acetate (10:1); white solid (138 mg, 73%); mp: 185-186 °C; <sup>1</sup>H NMR (400 MHz, CDCl<sub>3</sub>) δ: 0.96 (t, *J* = 7.2 Hz, 3H), 3.09 (s, 3H), 4.11 (q, *J* = 7.2 Hz, 2H), 6.84 (d, *J* = 8.0 Hz, 1H), 6.97 (td, *J*<sub>1</sub> = 8.0 Hz, *J*<sub>2</sub> = 0.8 Hz, 1H), 7.30-7.34 (m, 2H), 7.37-7.41 (m, 1H), 7.49-7.54 (m, 6H), 7.92 (d, *J* = 7.6 Hz, 1H), 9.34 (br s, 1H). <sup>13</sup>C NMR (150 MHz, CDCl<sub>3</sub>) δ: 13.8, 24.0, 61.1, 111.0, 117.3, 120.0, 120.5, 121.8, 123.0, 124.4, 124.79, 124.83, 126.0, 128.0, 128.2, 128.4, 129.6, 129.9, 132.0, 134.6, 136.1, 138.6, 139.0, 170.2. HRMS calcd for C<sub>26</sub>H<sub>21</sub>NNaO<sub>2</sub>: 402.1465 [M+Na]<sup>+</sup>, found: 402.1462.

**Ethyl 2-chloro-6-phenyl-11*H*-benzo[*a*]carbazole-5-carboxylate (3j):** Eluent: petroleum ether-ethyl acetate (10:1); white solid (140 mg, 70%); mp: 215-216 °C; <sup>1</sup>H NMR (400 MHz, CDCl<sub>3</sub>) δ: 0.95 (t, *J* = 7.2 Hz, 3H), 4.14 (q, *J* = 7.2 Hz, 2H), 6.84 (d, *J* = 8.0 Hz, 1H), 6.93 (td, *J*<sub>1</sub> = 8.0 Hz, *J*<sub>2</sub> = 1.2 Hz, 1H), 7.20-7.26 (m, 1H), 7.32 (d, *J* = 8.0 Hz, 1H), 7.36 (dd, *J*<sub>1</sub> = 9.2 Hz, *J*<sub>2</sub> = 2.0 Hz, 1H), 7.48 (s, 5H), 8.03 (d, *J* = 9.2 Hz, 1H), 8.10 (d, *J* = 2.0 Hz, 1H), 9.47 (br s, 1H). <sup>13</sup>C NMR (150 MHz, CDCl<sub>3</sub>) δ: 13.7, 61.5, 111.2, 117.3, 120.1, 120.3, 120.9, 121.9, 122.9, 123.8, 125.3, 127.0, 127.1, 127.8, 128.1, 128.4, 129.3, 131.5, 134.9, 135.8, 138.9, 139.1, 170.2. HRMS calcd for C<sub>25</sub>H<sub>18</sub>ClNNaO<sub>2</sub>: 422.0918 [M+Na]<sup>+</sup>, found: 422.0904.

**Ethyl 2-bromo-6-phenyl-11*H*-benzo[*a*]carbazole-5-carboxylate (3k):** Eluent: petroleum ether-ethyl acetate (10:1); white solid (162 mg, 73%); mp: 240-241 °C; <sup>1</sup>H NMR (400 MHz, CDCl<sub>3</sub>) δ: 0.95 (t, *J* = 7.2 Hz, 3H), 4.14 (q, *J* = 7.2 Hz, 2H), 6.83 (d, *J* = 7.6 Hz, 1H), 6.93 (td, *J*<sub>1</sub> = 8.0 Hz, *J*<sub>2</sub> = 1.2 Hz, 1H), 7.25 (td, *J*<sub>1</sub> = 8.0 Hz, *J*<sub>2</sub> = 1.2 Hz, 1H), 7.32 (d, *J* = 8.0 Hz, 1H), 7.48 (s, 5H), 7.52 (dd, *J*<sub>1</sub> = 8.8 Hz, *J*<sub>2</sub> = 2.0 Hz, 1H), 7.98 (d, *J* = 9.2 Hz, 1H), 8.29 (d, *J* = 2.0 Hz, 1H), 9.37 (br s, 1H). <sup>13</sup>C NMR (150 MHz, CDCl<sub>3</sub>) δ: 13.7, 61.5, 111.2, 117.4, 119.7, 120.2, 121.3, 122.0, 123.1, 123.5, 123.8, 125.3, 127.3, 128.0, 128.1, 128.4, 129.3, 129.6, 134.7, 135.9, 138.9, 139.1, 170.0. HRMS calcd for C<sub>25</sub>H<sub>18</sub>BrNNaO<sub>2</sub>: 466.0413 [M+Na]<sup>+</sup>, found: 466.0421.

**Ethyl 2-methyl-6-phenyl-11*H*-benzo[*a*]carbazole-5-carboxylate (3l):** Eluent: petroleum ether-ethyl acetate (10:1); white solid (137 mg, 72%); mp: 239-240 °C; <sup>1</sup>H NMR (600 MHz, CDCl<sub>3</sub>) δ: 0.95 (t, *J* = 7.2 Hz, 3H),

2.57 (s, 3H), 4.11 (q,  $J = 7.2$  Hz, 2H), 6.89 (d,  $J = 7.8$  Hz, 1H), 6.97 (t,  $J = 7.2$  Hz, 1H), 7.31 (t,  $J = 7.2$  Hz, 1H), 7.40 (d,  $J = 8.4$  Hz, 1H), 7.49-7.53 (m, 6H), 7.94 (s, 1H), 8.03 (d,  $J = 8.4$  Hz, 1H), 9.05 (s, 1H).  $^{13}\text{C}$  NMR (150 MHz,  $\text{CDCl}_3$ )  $\delta$ : 13.7, 21.8, 61.1, 111.0, 116.6, 119.9, 120.1, 120.3, 121.8, 123.3, 124.2, 124.8, 126.1, 127.1, 127.8, 128.3, 128.7, 129.5, 134.4, 135.4, 135.7, 138.9, 139.3, 170.1. HRMS calcd for  $\text{C}_{26}\text{H}_{22}\text{NO}_2$ : 380.1645  $[\text{M}+\text{H}]^+$ , found: 380.1657.

**Ethyl 8-fluoro-6-phenyl-11H-benzo[*a*]carbazole-5-carboxylate (3m):** Eluent: petroleum ether-ethyl acetate (10:1); white solid (128 mg, 67%); mp: 207-208 °C;  $^1\text{H}$  NMR (400 MHz,  $\text{CDCl}_3$ )  $\delta$ : 0.96 (t,  $J = 7.2$  Hz, 3H), 4.13 (q,  $J = 7.2$  Hz, 2H), 6.48 (dd,  $J_1 = 10.0$  Hz,  $J_2 = 2.4$  Hz, 1H), 7.01 (td,  $J_1 = 9.2$  Hz,  $J_2 = 2.8$  Hz, 1H), 7.32 (dd,  $J_1 = 8.8$  Hz,  $J_2 = 4.4$  Hz, 1H), 7.40-7.52 (m, 7H), 8.03-8.08 (m, 2H), 9.31 (br s, 1H).  $^{13}\text{C}$  NMR (150 MHz,  $\text{CDCl}_3$ )  $\delta$ : 13.7, 61.3, 107.3 (d,  $^2J_{\text{C-F}} = 26.65$  Hz), 111.6 (d,  $^3J_{\text{C-F}} = 8.7$  Hz), 112.9 (d,  $^2J_{\text{C-F}} = 27$  Hz), 116.2 (d,  $^4J_{\text{C-F}} = 4.35$  Hz), 120.1, 120.8, 123.4, 124.5 (d,  $^3J_{\text{C-F}} = 9.75$  Hz), 125.8, 126.2, 126.8, 128.2, 128.5, 129.0, 129.2, 135.2, 135.3, 137.0, 138.6, 157.4 (d,  $^1J_{\text{C-F}} = 233.1$  Hz), 170.1. HRMS calcd for  $\text{C}_{25}\text{H}_{19}\text{FNO}_2$ : 384.1394  $[\text{M}+\text{H}]^+$ , found: 384.1402.

**Ethyl 8-chloro-6-phenyl-11H-benzo[*a*]carbazole-5-carboxylate (3n):** Eluent: petroleum ether-ethyl acetate (10:1); white solid (138 mg, 69%); mp: 163-164 °C;  $^1\text{H}$  NMR (400 MHz,  $\text{CDCl}_3$ )  $\delta$ : 0.96 (t,  $J = 7.2$  Hz, 3H), 4.13 (q,  $J = 7.2$  Hz, 2H), 6.78 (d,  $J = 2.0$  Hz, 1H), 7.23 (dd,  $J_1 = 8.8$  Hz,  $J_2 = 1.2$  Hz, 1H), 7.36 (d,  $J = 8.8$  Hz, 1H), 7.48-7.53 (m, 7H), 8.05-8.09 (m, 2H), 9.26 (br s, 1H).  $^{13}\text{C}$  NMR (150 MHz,  $\text{CDCl}_3$ )  $\delta$ : 13.7, 61.3, 112.0, 115.8, 120.0, 120.7, 121.4, 123.8, 125.1, 125.2, 125.5, 125.9, 126.2, 126.9, 128.3, 128.5, 129.0, 129.2, 135.1, 136.4, 137.2, 138.5, 169.9. HRMS calcd for  $\text{C}_{25}\text{H}_{19}\text{ClNO}_2$ : 400.1099  $[\text{M}+\text{H}]^+$ , found: 400.1111.

**Ethyl 8-methyl-6-phenyl-11H-benzo[*a*]carbazole-5-carboxylate (3o):** Eluent: petroleum ether-ethyl acetate (10:1); white solid (133 mg, 70%); mp: 117-118 °C;  $^1\text{H}$  NMR (400 MHz,  $\text{CDCl}_3$ )  $\delta$ : 0.95 (t,  $J = 7.2$  Hz, 3H), 2.24 (s, 3H), 4.12 (q,  $J = 7.2$  Hz, 2H), 6.63 (s, 1H), 7.11-7.13 (m, 1H), 7.34 (d,  $J = 8.0$  Hz, 1H), 7.44-7.54 (m,

7H), 8.07 (d,  $J = 7.6$  Hz, 1H), 8.12 (d,  $J = 8.0$  Hz, 1H), 9.13 (br s, 1H).  $^{13}\text{C}$  NMR (150 MHz,  $\text{CDCl}_3$ )  $\delta$ : 13.8, 21.6, 61.4, 110.7, 116.3, 120.1, 120.8, 121.7, 123.1, 124.3, 125.7, 126.2, 126.4, 126.5, 127.9, 128.3, 128.8, 129.2, 129.4, 135.4, 136.0, 137.2, 139.3, 170.1. HRMS calcd for  $\text{C}_{26}\text{H}_{22}\text{NO}_2$ : 380.1645  $[\text{M}+\text{H}]^+$ , found: 380.1658.

**Ethyl 8-phenyl-13H-naphtho[1,2-a]carbazole-7-carboxylate (3p):** Eluent: petroleum ether-ethyl acetate (10:1); white solid (137 mg, 66%); mp: 261-262 °C;  $^1\text{H}$  NMR (400 MHz,  $\text{DMSO}-d_6$ )  $\delta$ : 0.91 (t,  $J = 7.2$  Hz, 3H), 4.09 (q,  $J = 7.2$  Hz, 2H), 6.75 (d,  $J = 8.4$  Hz, 1H), 6.97 (t,  $J = 8.0$  Hz, 1H), 7.40-7.52 (m, 1H), 7.60-7.61 (m, 2H), 7.60-7.61 (m, 3H), 7.78 (t,  $J = 7.6$  Hz, 1H), 7.89 (d,  $J = 8.0$  Hz, 1H), 7.92-7.97 (m, 2H), 8.02 (d,  $J = 8.8$  Hz, 1H), 8.15 (d,  $J = 7.6$  Hz, 1H), 9.32 (d,  $J = 8.4$  Hz, 1H), 12.28 (br s, 1H).  $^{13}\text{C}$  NMR (150 MHz,  $\text{CDCl}_3$ )  $\delta$ : 13.7, 61.2, 111.2, 116.2, 120.1, 120.4, 122.2, 123.6, 124.3, 124.4, 125.1, 125.6, 126.2, 127.4, 127.5, 128.0, 128.1, 128.4, 129.3, 129.4, 129.5, 132.3, 134.8, 136.7, 138.8, 140.2, 170.1. HRMS calcd for  $\text{C}_{29}\text{H}_{21}\text{NNaO}_2$ : 438.1465  $[\text{M}+\text{Na}]^+$ , found: 438.1476.

**Ethyl 5-phenyl-10H-thieno[3,2-a]carbazole-4-carboxylate (3q):** Eluent: petroleum ether-ethyl acetate (10:1); white solid (141 mg, 76%); mp: 182-183 °C;  $^1\text{H}$  NMR (400 MHz,  $\text{CDCl}_3$ )  $\delta$ : 0.91 (t,  $J = 7.2$  Hz, 3H), 4.09 (q,  $J = 7.2$  Hz, 2H), 6.75 (d,  $J = 8.4$  Hz, 1H), 6.94 (td,  $J_1 = 8.0$  Hz,  $J_2 = 0.8$  Hz, 1H), 7.29 (td,  $J_1 = 8.0$  Hz,  $J_2 = 0.8$  Hz, 1H), 7.40 (d,  $J = 8.0$  Hz, 1H), 7.45-7.51 (m, 6H), 7.87 (d,  $J = 5.2$  Hz, 1H), 8.74 (br s, 1H).  $^{13}\text{C}$  NMR (150 MHz,  $\text{CDCl}_3$ )  $\delta$ : 13.7, 60.9, 111.0, 117.9, 119.7, 120.2, 122.2, 124.2, 125.4, 125.5, 125.6, 127.6, 128.3, 129.3, 135.0, 135.6, 137.5, 139.5, 139.9, 169.3. HRMS calcd for  $\text{C}_{23}\text{H}_{17}\text{NNaO}_2\text{S}$ : 394.0872  $[\text{M}+\text{Na}]^+$ , found: 394.0873.

**Ethyl 6-(4-(trifluoromethyl)phenyl)-11H-benzo[a]carbazole-5-carboxylate (3r):** Eluent: petroleum ether-ethyl acetate (10:1); white solid (149 mg, 69%); mp: 208-209 °C;  $^1\text{H}$  NMR (400 MHz,  $\text{CDCl}_3$ )  $\delta$ : 0.95 (t,  $J = 7.2$  Hz, 3H), 4.12 (q,  $J = 7.2$  Hz, 2H), 6.81 (d,  $J = 8.4$  Hz, 1H), 6.99-7.03 (m, 1H), 7.33-7.37 (m, 1H), 7.52 (d,



$J = 8.4$  Hz, 1H), 7.56 (dd,  $J_1 = 6.4$  Hz,  $J_2 = 3.2$  Hz, 2H), 7.66 (d,  $J = 7.6$  Hz, 2H), 7.79 (d,  $J = 8.0$  Hz, 2H), 8.14 (dd,  $J_1 = 6.4$  Hz,  $J_2 = 3.2$  Hz, 2H), 9.20 (br s, 1H).  $^{13}\text{C}$  NMR (150 MHz,  $\text{CDCl}_3$ )  $\delta$ : 13.5, 61.3, 111.2, 115.8, 120.2, 120.3, 120.8, 121.5, 123.5, 123.7, 124.2 (q,  $^1J_{\text{C-F}} = 270.45$  Hz), 125.2, 125.3 (q,  $^3J_{\text{C-F}} = 2.85$  Hz), 126.23, 126.25, 126.4, 126.8, 128.8, 130.0, 130.2 (q,  $^2J_{\text{C-F}} = 31.5$  Hz), 133.6, 135.8, 138.9, 169.5. HRMS calcd for  $\text{C}_{26}\text{H}_{19}\text{F}_3\text{NO}_2$ : 434.1362  $[\text{M}+\text{H}]^+$ , found: 434.1353.

**Ethyl 6-(4-fluorophenyl)-11H-benzo[*a*]carbazole-5-carboxylate (3s):** Eluent: petroleum ether-ethyl acetate (10:1); white solid (130 mg, 68%); mp: 182-183 °C;  $^1\text{H}$  NMR (400 MHz,  $\text{CDCl}_3$ )  $\delta$ : 1.02 (t,  $J = 7.2$  Hz, 3H), 4.17 (q,  $J = 7.2$  Hz, 2H), 6.86 (d,  $J = 8.0$  Hz, 1H), 6.98 (td,  $J_1 = 8.0$  Hz,  $J_2 = 0.8$  Hz, 1H), 7.18-7.22 (m, 2H), 7.30 (td,  $J_1 = 8.0$  Hz,  $J_2 = 1.2$  Hz, 1H), 7.43-7.52 (m, 5H), 8.06-8.10 (m, 2H), 9.30 (s, 1H).  $^{13}\text{C}$  NMR (150 MHz,  $\text{CDCl}_3$ )  $\delta$ : 13.9, 61.3, 111.2, 115.4 (d,  $^2J_{\text{C-F}} = 25.15$  Hz), 116.5, 120.10, 120.14, 120.8, 121.6, 123.7, 123.9, 125.1, 125.9, 126.2, 126.6, 128.8, 131.2 (d,  $^3J_{\text{C-F}} = 8.4$  Hz), 134.0, 135.1 (d,  $^4J_{\text{C-F}} = 3.3$  Hz), 135.7, 138.9, 162.7 (d,  $^1J_{\text{C-F}} = 245.85$  Hz), 170.0. HRMS calcd for  $\text{C}_{25}\text{H}_{18}\text{FNNO}_2$ : 406.1214  $[\text{M}+\text{Na}]^+$ , found: 406.1221.

**Ethyl 6-(4-chlorophenyl)-11H-benzo[*a*]carbazole-5-carboxylate (3t):** Eluent: petroleum ether-ethyl acetate (10:1); white solid (132 mg, 66%); mp: 203-204 °C;  $^1\text{H}$  NMR (400 MHz,  $\text{CDCl}_3$ )  $\delta$ : 1.03 (t,  $J = 7.2$  Hz, 3H), 4.16 (q,  $J = 7.2$  Hz, 2H), 6.90 (d,  $J = 8.4$  Hz, 1H), 6.99-7.02 (m, 1H), 7.30-7.34 (m, 1H), 7.44-7.54 (m, 7H), 8.10 (dd,  $J_1 = 8.0$  Hz,  $J_2 = 1.6$  Hz, 2H), 9.27 (s, 1H).  $^{13}\text{C}$  NMR (150 MHz,  $\text{CDCl}_3$ )  $\delta$ : 13.9, 61.3, 111.2, 116.2, 120.16, 120.18, 120.8, 121.6, 123.6, 123.9, 125.1, 126.0, 126.2, 126.7, 128.6, 128.8, 130.9, 133.8, 134.0, 135.8, 137.7, 138.9, 169.8. HRMS calcd for  $\text{C}_{25}\text{H}_{19}\text{ClNO}_2$ : 400.1099  $[\text{M}+\text{H}]^+$ , found: 400.1079.

**Ethyl 6-(4-bromophenyl)-11H-benzo[*a*]carbazole-5-carboxylate (3u):** Eluent: petroleum ether-ethyl acetate (10:1); white solid (160 mg, 72%); mp: 223-224 °C;  $^1\text{H}$  NMR (400 MHz,  $\text{CDCl}_3$ )  $\delta$ : 1.03 (t,  $J = 7.2$  Hz, 3H), 4.16 (q,  $J = 7.2$  Hz, 2H), 6.92 (d,  $J = 8.0$  Hz, 1H), 7.01 (td,  $J_1 = 7.6$  Hz,  $J_2 = 0.8$  Hz, 1H), 7.33 (td,  $J_1 = 8.0$  Hz,

$J_2 = 1.2$  Hz, 1H), 7.40 (dd,  $J_1 = 6.8$  Hz,  $J_2 = 2.0$  Hz, 2H), 7.48-7.54 (m, 3H), 7.65 (dd,  $J_1 = 6.8$  Hz,  $J_2 = 2.0$  Hz, 2H), 8.09-8.12 (m, 2H), 9.25 (br s, 1H).  $^{13}\text{C}$  NMR (150 MHz,  $\text{CDCl}_3$ )  $\delta$ : 13.8, 61.3, 111.2, 116.1, 120.16, 120.21, 120.8, 121.7, 122.2, 123.5, 123.8, 125.1, 126.0, 126.3, 126.7, 128.8, 131.2, 131.6, 133.8, 135.8, 138.2, 138.9, 169.8. HRMS calcd for  $\text{C}_{25}\text{H}_{18}\text{BrNNaO}_2$ : 466.0413  $[\text{M}+\text{Na}]^+$ , found: 466.0415.

**Ethyl 6-(*p*-tolyl)-11*H*-benzo[*a*]carbazole-5-carboxylate (3v):** Eluent: petroleum ether-ethyl acetate (10:1); white solid (138 mg, 73%); mp: 223-224 °C;  $^1\text{H}$  NMR (400 MHz,  $\text{CDCl}_3$ )  $\delta$ : 1.00 (t,  $J = 7.2$  Hz, 3H), 2.49 (s, 3H), 4.15 (q,  $J = 7.2$  Hz, 2H), 6.96-6.99 (m, 2H), 7.30-7.34 (m, 3H), 7.41-7.43 (d,  $J = 7.6$  Hz, 2H), 7.48-7.55 (m, 3H), 8.08-8.13 (m, 2H), 9.18 (br s, 1H).  $^{13}\text{C}$  NMR (150 MHz,  $\text{CDCl}_3$ )  $\delta$ : 13.8, 21.5, 61.1, 111.0, 116.7, 119.97, 120.02, 120.7, 122.0, 123.7, 124.2, 124.9, 125.7, 126.2, 126.5, 128.9, 129.0, 129.2, 135.4, 135.7, 136.0, 137.5, 138.9, 170.1. HRMS calcd for  $\text{C}_{26}\text{H}_{21}\text{NNaO}_2$ : 402.1465  $[\text{M}+\text{Na}]^+$ , found: 402.1446.

**Ethyl 6-(4-methoxyphenyl)-11*H*-benzo[*a*]carbazole-5-carboxylate (3w):** Eluent: petroleum ether-ethyl acetate (10:1); white solid (148 mg, 75%); mp: 216-217 °C;  $^1\text{H}$  NMR (400 MHz,  $\text{CDCl}_3$ )  $\delta$ : 1.04 (t,  $J = 7.2$  Hz, 3H), 3.91 (s, 3H), 4.17 (q,  $J = 7.2$  Hz, 2H), 6.99-7.00 (m, 2H), 7.04 (d,  $J = 8.4$  Hz, 2H), 7.30-7.34 (m, 1H), 7.45 (d,  $J = 8.8$  Hz, 2H), 7.48-7.55 (m, 3H), 8.07-8.13 (m, 2H), 9.19 (s, 1H).  $^{13}\text{C}$  NMR (150 MHz,  $\text{CDCl}_3$ )  $\delta$ : 13.9, 55.4, 61.1, 111.0, 113.8, 116.9, 120.0, 120.7, 121.9, 123.9, 124.2, 124.9, 125.7, 126.2, 126.5, 128.9, 130.6, 131.4, 134.9, 135.6, 138.9, 159.4, 170.2. HRMS calcd for  $\text{C}_{26}\text{H}_{22}\text{NO}_3$ : 396.1594  $[\text{M}+\text{H}]^+$ , found: 396.1596

**Ethyl 6-(thiophen-2-yl)-11*H*-benzo[*a*]carbazole-5-carboxylate (3x):** Eluent: petroleum ether-ethyl acetate (10:1); white solid (130 mg, 70%); mp: 198-199 °C;  $^1\text{H}$  NMR (400 MHz,  $\text{CDCl}_3$ )  $\delta$ : 1.12 (t,  $J = 7.2$  Hz, 3H), 4.25 (q,  $J = 7.2$  Hz, 2H), 7.01-7.06 (m, 2H), 7.20-7.23 (m, 2H), 7.31-7.35 (m, 1H), 7.39-7.53 (m, 3H), 7.53-5.54 (m, 1H), 7.99-8.01 (m, 1H), 8.05 (d,  $J = 8.0$  Hz, 1H), 9.22 (br s, 1H).  $^{13}\text{C}$  NMR (150 MHz,  $\text{CDCl}_3$ )  $\delta$ : 14.0, 61.5, 111.1, 117.4, 120.2, 120.4, 120.7, 121.8, 123.8, 125.1, 125.7, 126.2, 126.45, 125.49, 127.1, 127.2, 128.0, 128.5, 135.5, 138.9, 139.0, 169.9. HRMS calcd for  $\text{C}_{23}\text{H}_{18}\text{NO}_2\text{S}$ : 372.1053  $[\text{M}+\text{H}]^+$ , found: 372.1060.

**1-(6-Methyl-11H-benzo[*a*]carbazol-5-yl)ethanone (3y):** Eluent: petroleum ether-ethyl acetate (10:1); white solid (29 mg, 21%); mp: 165-166 °C; <sup>1</sup>H NMR (400 MHz, CDCl<sub>3</sub>) δ: 2.71 (s, 3H), 2.88 (s, 3H), 7.31 (t, *J* = 7.2 Hz, 1H), 7.42-7.53 (m, 3H), 7.59 (d, *J* = 8.0 Hz, 1H), 7.71-7.73 (m, 1H), 8.07-8.09 (m, 1H), 8.21 (d, *J* = 8.0 Hz, 1H), 9.01 (s, 1H). <sup>13</sup>C NMR (150 MHz, CDCl<sub>3</sub>) δ: 18.2, 34.0, 111.2, 117.2, 119.5, 120.3, 120.8, 122.2, 124.6, 124.8, 125.0, 125.1, 126.1, 127.5, 128.0, 131.7, 135.0, 138.8, 209.4. HRMS calcd for C<sub>19</sub>H<sub>16</sub>NO: 274.1226 [M+H]<sup>+</sup>, found: 274.1230.

## 2. Optimization studies on the formation of 5a

**Table 1.** Optimization studies on the formation of **5a**<sup>a</sup>

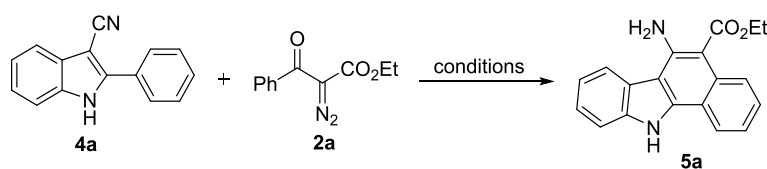

| Entry    | Catalyst                                 | Additive (equiv)                                      | Solvent                 | Yield (%) <sup>b</sup> |
|----------|------------------------------------------|-------------------------------------------------------|-------------------------|------------------------|
| 1        | [RhCp*Cl <sub>2</sub> ] <sub>2</sub>     | Cu(OAc) <sub>2</sub> (0.1)                            | CH <sub>3</sub> CN      | 32                     |
| 2        | [RhCp*Cl <sub>2</sub> ] <sub>2</sub>     | AgSbF <sub>6</sub> (0.2)                              | CH <sub>3</sub> CN      | 13                     |
| 3        | [RhCp*Cl <sub>2</sub> ] <sub>2</sub>     | Cu(OAc) <sub>2</sub> (0.1) + AgSbF <sub>6</sub> (0.2) | CH <sub>3</sub> CN      | 47                     |
| <b>4</b> | <b>[RhCp*Cl<sub>2</sub>]<sub>2</sub></b> | <b>AgOAc (0.2) + AgSbF<sub>6</sub> (0.2)</b>          | <b>CH<sub>3</sub>CN</b> | <b>68</b>              |
| 5        | [RhCp*Cl <sub>2</sub> ] <sub>2</sub>     | CsOAc (0.2) + AgSbF <sub>6</sub> (0.2)                | CH <sub>3</sub> CN      | 34                     |
| 6        | [RhCp*Cl <sub>2</sub> ] <sub>2</sub>     | AgOAc (0.1) + AgSbF <sub>6</sub> (0.1)                | CH <sub>3</sub> CN      | 45                     |
| 7        | [RhCp*Cl <sub>2</sub> ] <sub>2</sub>     | AgOAc (0.2) + AgSbF <sub>6</sub> (0.2)                | DCE                     | 12                     |
| 8        | [RhCp*Cl <sub>2</sub> ] <sub>2</sub>     | AgOAc (0.2) + AgSbF <sub>6</sub> (0.2)                | THF                     | 28                     |
| 9        | -                                        | AgOAc (0.2) + AgSbF <sub>6</sub> (0.2)                | CH <sub>3</sub> CN      | -                      |
| 10       | [RhCp*Cl <sub>2</sub> ] <sub>2</sub>     | -                                                     | CH <sub>3</sub> CN      | 19                     |
| 11       | [RhCp*Cl <sub>2</sub> ] <sub>2</sub>     | AgOAc (0.2)                                           | CH <sub>3</sub> CN      | 44                     |

<sup>a</sup> Conditions: 0.5 mmol of **4a**, 0.75 mmol of **2a**, 0.025 mmol of catalyst, sealed tube, 120 °C, 18 h. <sup>b</sup> Isolated yield.

### 3. General synthetic procedure and spectroscopic data of 5a-5h.

2-Aryl-1*H*-indole-3-carbonitrile (**4**, 0.5 mmol),  $\alpha$ -diazo carbonyl compound (**2**, 0.75 mmol), [RhCp\*Cl<sub>2</sub>]<sub>2</sub> (0.025 mmol), AgOAc (0.1 mmol), AgSbF<sub>6</sub> (0.1 mmol), and CH<sub>3</sub>CN (3 mL) were charged into a sealed tube. The reaction mixture was then stirred at 120 °C. Upon completion, it was cooled to room temperature, quenched with saturated brine (10 mL), and extracted with EtOAc (10 mL  $\times$  3). The combined organic phase was dried over anhydrous Na<sub>2</sub>SO<sub>4</sub>, and concentrated under reduced pressure. The residue was purified by silica gel chromatography using petroleum ether/ethyl acetate (10:1) as eluent to afford **5**.

**Ethyl 6-amino-11*H*-benzo[*a*]carbazole-5-carboxylate (5a):** Eluent: petroleum ether-ethyl acetate (10:1); white solid (103 mg, 68%); mp: 177-178 °C; <sup>1</sup>H NMR (600 MHz, CDCl<sub>3</sub>)  $\delta$ : 1.50 (t, *J* = 7.2 Hz, 3H), 4.53 (q, *J* = 7.2 Hz, 2H), 6.68 (br s, 2H), 7.27-7.32 (m, 2H), 7.39 (t, *J* = 7.2 Hz, 1H), 7.47 (t, *J* = 7.8 Hz, 1H), 7.54 (d, *J* = 7.8 Hz, 1H), 7.90 (d, *J* = 8.4 Hz, 1H), 7.97 (d, *J* = 7.8 Hz, 1H), 8.68 (d, *J* = 9.0 Hz, 1H), 9.07 (br s, 1H). <sup>13</sup>C NMR (150 MHz, CDCl<sub>3</sub>)  $\delta$ : 14.6, 60.5, 97.8, 108.0, 111.5, 116.4, 120.1, 120.6, 120.9, 122.1, 123.4, 124.4, 126.4, 127.1, 132.6, 138.2, 138.6, 148.8, 170.2. HRMS calcd for C<sub>19</sub>H<sub>16</sub>N<sub>2</sub>NaO<sub>2</sub>: 327.1104 [M+Na]<sup>+</sup>, found: 327.1105.

**Ethyl 6-amino-3-(trifluoromethyl)-11*H*-benzo[*a*]carbazole-5-carboxylate (5b):** Eluent: petroleum ether-ethyl acetate (10:1); white solid (128 mg, 69%); mp: 197-198 °C; <sup>1</sup>H NMR (600 MHz, CDCl<sub>3</sub>)  $\delta$ : 1.53 (t, *J* = 7.2 Hz, 3H), 4.52 (q, *J* = 7.2 Hz, 2H), 6.94 (br s, 2H), 7.36-7.39 (m, 1H), 7.47-7.49 (m, 2H), 7.60 (d, *J* = 7.8 Hz, 1H), 7.95 (d, *J* = 8.4 Hz, 1H), 8.00 (d, *J* = 8.4 Hz, 1H), 8.96 (br s, 1H), 9.10 (s, 1H). <sup>13</sup>C NMR (150 MHz, CDCl<sub>3</sub>)  $\delta$ : 14.3, 60.7, 97.6, 109.3, 111.7, 117.7, 117.8 (q, <sup>3</sup>*J*<sub>C-F</sub> = 3.3 Hz), 120.4, 121.1, 121.4, 123.1, 124.2 (q, <sup>3</sup>*J*<sub>C-F</sub> = 4.35 Hz), 124.8 (q, <sup>1</sup>*J*<sub>C-F</sub> = 270.3 Hz), 125.1, 128.5 (q, <sup>2</sup>*J*<sub>C-F</sub> = 31.65 Hz), 131.9, 137.7, 138.2, 150.0, 169.7. HRMS calcd for C<sub>20</sub>H<sub>15</sub>F<sub>3</sub>N<sub>2</sub>NaO<sub>2</sub>: 395.0978 [M+Na]<sup>+</sup>, found: 395.0985.

**Ethyl 6-amino-3-fluoro-11H-benzo[*a*]carbazole-5-carboxylate (5c):** Eluent: petroleum ether-ethyl acetate (10:1); white solid (103 mg, 64%); mp: 180-181 °C; <sup>1</sup>H NMR (600 MHz, CDCl<sub>3</sub>) δ: 1.52 (t, *J* = 7.2 Hz, 3H), 4.53 (q, *J* = 7.2 Hz, 2H), 6.93 (br s, 2H), 7.06-7.09 (m, 1H), 7.35 (t, *J* = 7.8 Hz, 1H), 7.43 (t, *J* = 7.8 Hz, 1H), 7.57 (t, *J* = 7.8 Hz, 1H), 7.87 (dd, *J*<sub>1</sub> = 8.4 Hz, *J*<sub>2</sub> = 6.0 Hz, 1H), 7.98 (d, *J* = 7.8 Hz, 1H), 8.47 (dd, *J*<sub>1</sub> = 13.8 Hz, *J*<sub>2</sub> = 2.4 Hz, 1H), 8.91 (br s, 1H). <sup>13</sup>C NMR (150 MHz, CDCl<sub>3</sub>) δ: 14.6, 60.6, 97.0 (d, <sup>3</sup>*J*<sub>C-F</sub> = 4.35 Hz), 107.5, 111.1 (d, <sup>2</sup>*J*<sub>C-F</sub> = 24 Hz), 111.5, 111.6 (d, <sup>2</sup>*J*<sub>C-F</sub> = 25.2 Hz), 113.2, 120.0, 121.2, 122.4 (d, <sup>3</sup>*J*<sub>C-F</sub> = 9.9 Hz), 123.4, 124.5, 134.5, 138.0, 138.6, 150.2, 162.1 (d, <sup>1</sup>*J*<sub>C-F</sub> = 241.8 Hz), 169.9. HRMS calcd for C<sub>19</sub>H<sub>16</sub>FN<sub>2</sub>O<sub>2</sub>: 323.1190 [M+H]<sup>+</sup>, found: 323.1210.

**Ethyl 6-amino-3-chloro-11H-benzo[*a*]carbazole-5-carboxylate (5d):** Eluent: petroleum ether-ethyl acetate (10:1); white solid (106 mg, 63%); mp: 218-219 °C; <sup>1</sup>H NMR (600 MHz, DMSO-*d*<sub>6</sub>) δ: 1.43 (t, *J* = 7.2 Hz, 3H), 4.46 (q, *J* = 7.2 Hz, 2H), 7.31 (t, *J* = 7.8 Hz, 1H), 7.397-7.402 (m, 3H), 7.46 (t, *J* = 7.8 Hz, 1H), 7.68 (d, *J* = 7.8 Hz, 1H), 8.38 (d, *J* = 8.4 Hz, 1H), 8.41 (d, *J* = 7.8 Hz, 1H), 8.66 (d, *J* = 1.8 Hz, 1H), 12.56 (s, 1H). <sup>13</sup>C NMR (150 MHz, DMSO-*d*<sub>6</sub>) δ: 14.8, 60.6, 95.2, 107.5, 112.1, 115.3, 120.8, 121.4, 122.1, 122.9, 124.4, 124.9, 125.0, 132.3, 133.8, 138.97, 139.00, 150.0, 169.3. HRMS calcd for C<sub>19</sub>H<sub>16</sub>ClN<sub>2</sub>O<sub>2</sub>: 339.0895 [M+H]<sup>+</sup>, found: 339.0901.

**Ethyl 6-amino-3-bromo-11H-benzo[*a*]carbazole-5-carboxylate (5e):** Eluent: petroleum ether-ethyl acetate (10:1); white solid (126 mg, 66%); mp: 209-210 °C; <sup>1</sup>H NMR (600 MHz, DMSO-*d*<sub>6</sub>) δ: 1.43 (t, *J* = 7.2 Hz, 3H), 4.45 (q, *J* = 7.2 Hz, 2H), 7.31 (t, *J* = 7.2 Hz, 1H), 7.39 (s, 2H), 7.46 (t, *J* = 7.8 Hz, 1H), 7.51 (dd, *J*<sub>1</sub> = 8.4 Hz, *J*<sub>2</sub> = 1.2 Hz, 1H), 7.67 (d, *J* = 7.8 Hz, 1H), 8.31 (d, *J* = 8.4 Hz, 1H), 8.41 (d, *J* = 7.8 Hz, 1H), 8.82 (d, *J* = 1.2 Hz, 1H), 12.56 (s, 1H). <sup>13</sup>C NMR (150 MHz, DMSO-*d*<sub>6</sub>) δ: 14.8, 60.6, 95.1, 107.6, 112.1, 115.5, 120.8, 121.2, 121.4, 122.9, 124.5, 124.7, 124.9, 128.1, 134.1, 138.98, 139.00, 149.8, 169.3. HRMS calcd for C<sub>19</sub>H<sub>16</sub>BrN<sub>2</sub>O<sub>2</sub>: 383.0390 [M+H]<sup>+</sup>, found: 383.0392.

**Ethyl 6-amino-8-(trifluoromethyl)-11H-benzo[*a*]carbazole-5-carboxylate (5f):** Eluent: petroleum ether-ethyl acetate (10:1); white solid (139 mg, 75%); mp: 218-219 °C; <sup>1</sup>H NMR (600 MHz, DMSO-*d*<sub>6</sub>) δ: 1.42 (t, *J* = 7.2 Hz, 3H), 4.46 (q, *J* = 7.2 Hz, 2H), 7.26 (s, 2H), 7.40 (t, *J* = 7.8 Hz, 1H), 7.53 (t, *J* = 7.8 Hz, 1H), 7.75 (d, *J* = 9.0 Hz, 1H), 7.85 (d, *J* = 8.4 Hz, 1H), 8.41 (d, *J* = 7.8 Hz, 1H), 8.53 (d, *J* = 9.0 Hz, 1H), 8.83 (s, 1H), 12.88 (s, 1H). <sup>13</sup>C NMR (150 MHz, DMSO-*d*<sub>6</sub>) δ: 14.8, 60.5, 97.7, 107.7, 112.5, 116.6, 119.1 (q, <sup>3</sup>*J*<sub>C-F</sub> = 3.3 Hz), 121.2, 121.3 (q, <sup>2</sup>*J*<sub>C-F</sub> = 31.8 Hz), 122.4, 122.6, 122.7, 126.00 (q, <sup>1</sup>*J*<sub>C-F</sub> = 269.1 Hz), 126.01, 127.8, 132.9, 140.5, 140.8, 148.1, 169.7. HRMS calcd for C<sub>20</sub>H<sub>16</sub>F<sub>3</sub>N<sub>2</sub>O<sub>2</sub>: 373.1158 [M+H]<sup>+</sup>, found: 373.1160.

**Ethyl 6-amino-8-fluoro-11H-benzo[*a*]carbazole-5-carboxylate (5g):** Eluent: petroleum ether-ethyl acetate (10:1); white solid (105 mg, 65%); mp: 202-203 °C; <sup>1</sup>H NMR (600 MHz, CDCl<sub>3</sub>) δ: 1.51 (t, *J* = 7.2 Hz, 3H), 4.54 (q, *J* = 7.2 Hz, 2H), 6.62 (br s, 2H), 7.17-7.20 (m, 1H), 7.35 (t, *J* = 7.2 Hz, 1H), 7.49-7.53 (m, 2H), 7.69 (d, *J* = 9.6 Hz, 1H), 7.92 (d, *J* = 8.4 Hz, 1H), 8.69 (d, *J* = 9.0 Hz, 1H), 8.91 (br s, 1H). <sup>13</sup>C NMR (150 MHz, DMSO-*d*<sub>6</sub>) δ: 14.8, 60.4, 96.4, 107.0 (d, <sup>2</sup>*J*<sub>C-F</sub> = 25.05 Hz), 107.4 (d, <sup>4</sup>*J*<sub>C-F</sub> = 3.3 Hz), 112.3 (d, <sup>2</sup>*J*<sub>C-F</sub> = 26.25 Hz), 112.7 (d, <sup>3</sup>*J*<sub>C-F</sub> = 9.75 Hz), 116.8, 122.2, 122.4, 123.3 (d, <sup>3</sup>*J*<sub>C-F</sub> = 10.95 Hz), 126.0, 127.6, 132.8, 135.5, 140.6, 148.5, 157.8 (d, <sup>1</sup>*J*<sub>C-F</sub> = 231.9 Hz), 169.8. HRMS calcd for C<sub>19</sub>H<sub>15</sub>FN<sub>2</sub>NaO<sub>2</sub>: 345.1010 [M+Na]<sup>+</sup>, found: 345.1030.

**Ethyl 5-amino-10H-thieno[2,3-*a*]carbazole-4-carboxylate (5h):** Eluent: petroleum ether-ethyl acetate (10:1); white solid (113 mg, 73%); mp: 191-192 °C; <sup>1</sup>H NMR (600 MHz, CDCl<sub>3</sub>) δ: 1.51 (t, *J* = 7.2 Hz, 3H), 4.49 (q, *J* = 7.2 Hz, 2H), 6.89 (br s, 2H), 7.32 (t, *J* = 7.8 Hz, 1H), 7.40 (t, *J* = 7.8 Hz, 1H), 7.45 (d, *J* = 5.4 Hz, 1H), 7.49 (d, *J* = 7.8 Hz, 1H), 7.99 (d, *J* = 7.8 Hz, 1H), 8.17 (d, *J* = 5.4 Hz, 1H), 8.51 (br s, 1H). <sup>13</sup>C NMR (150 MHz, CDCl<sub>3</sub>) δ: 14.6, 60.3, 98.2, 107.9, 111.2, 114.3, 120.1, 121.0, 123.7, 124.4, 124.8, 127.8, 137.1, 138.4, 139.4, 149.1, 169.5. HRMS calcd for C<sub>17</sub>H<sub>15</sub>N<sub>2</sub>O<sub>2</sub>S: 311.0849 [M+H]<sup>+</sup>, found: 311.0864.

## 4. Synthesis of 2-bromo-11*H*-benzo[*a*]carbazole-5-carboxylic acid (8)

### 4.1 Synthetic procedure and spectroscopic data of 5i

2-(3-Bromophenyl)-1*H*-indole-3-carbonitrile (**4i**, 0.5 mmol), ethyl 2-diazo-3-oxo-3-phenylpropanoate (**2a**, 0.75 mmol), [RhCp\*Cl<sub>2</sub>]<sub>2</sub> (0.025 mmol), AgOAc (0.1 mmol), AgSbF<sub>6</sub> (0.1 mmol), and CH<sub>3</sub>CN (3 mL) were charged into a sealed tube. The reaction mixture was then stirred at 120 °C. Upon completion, it was cooled to room temperature, quenched with saturated brine (10 mL), and extracted with EtOAc (10 mL × 3). The combined organic phase was dried over anhydrous Na<sub>2</sub>SO<sub>4</sub>, and concentrated under reduced pressure. The residue was purified by silica gel chromatography using petroleum ether/ethyl acetate (10:1) as eluent to afford **5i**.

**Ethyl 6-amino-2-bromo-11*H*-benzo[*a*]carbazole-5-carboxylate (5i):** Eluent: petroleum ether-ethyl acetate (10:1); white solid (130 mg, 68%); mp: 167-168 °C; <sup>1</sup>H NMR (400 MHz, DMSO-*d*<sub>6</sub>) δ: 1.40 (t, *J* = 7.2 Hz, 3H), 4.43 (q, *J* = 7.2 Hz, 2H), 7.28-7.33 (m, 3H), 7.45 (t, *J* = 7.6 Hz, 1H), 7.56 (dd, *J*<sub>1</sub> = 8.8 Hz, *J*<sub>2</sub> = 2.0 Hz, 1H), 7.67 (d, *J* = 8.0 Hz, 1H), 8.41 (d, *J* = 8.0 Hz, 1H), 8.49 (d, *J* = 9.2 Hz, 1H), 8.61 (d, *J* = 2.4 Hz, 1H), 12.54 (s, 1H). <sup>13</sup>C NMR (100 MHz, DMSO-*d*<sub>6</sub>) δ: 14.3, 60.0, 95.6, 107.6, 111.6, 114.1, 117.8, 120.3, 121.0, 122.4, 124.0, 124.5, 127.8, 129.2, 130.9, 137.6, 138.5, 148.6, 169.0. HRMS calcd for C<sub>19</sub>H<sub>16</sub>BrN<sub>2</sub>O<sub>2</sub>: 383.0390 [M+H]<sup>+</sup>, found: 383.0395.

### 4.2 Synthetic procedure and spectroscopic data of 7

To a flask containing ethyl 6-amino-2-bromo-11*H*-benzo[*a*]carbazole-5-carboxylate (**5i**, 77 mg, 0.2 mmol), DMSO (0.2 mL) and diluted HCl (2M, 2 mL) was added an aqueous solution of NaNO<sub>2</sub> (30% w/w in water, 0.07 mL) dropwisely at 0 °C with stirring. The resulting mixture was stirred at 0 °C for 0.5 h. Then, H<sub>3</sub>PO<sub>2</sub> (50% w/w in water, 0.06 mL) was added in a drop-wise manner. It was then stirred at room temperature for 3 h. Upon completion as monitored by TLC, it was quenched with aqueous solution of NaHCO<sub>3</sub>, and extracted with ethyl acetate (5 mL × 3). The combined organic phases were washed with brine, dried over anhydrous

Na<sub>2</sub>SO<sub>4</sub>, and concentrated under vacuum. The residue was purified by column chromatography on silica gel using petroleum ether-ethyl acetate (10:1) as the eluent to give **7**.

**Ethyl 2-bromo-11H-benzo[*a*]carbazole-5-carboxylate (7):** Eluent: petroleum ether-ethyl acetate (10:1); yellow solid (39 mg, 53%); mp: 258-259 °C; <sup>1</sup>H NMR (600 MHz, DMSO-*d*<sub>6</sub>) δ: 1.43 (t, *J* = 7.2 Hz, 3H), 4.42 (q, *J* = 7.2 Hz, 2H), 7.30 (t, *J* = 7.8 Hz, 1H), 7.48 (t, *J* = 7.8 Hz, 1H), 7.68 (d, *J* = 8.4 Hz, 1H), 7.40 (d, *J* = 9.6 Hz, 1H), 8.25 (d, *J* = 7.8 Hz, 1H), 8.44 (s, 1H), 8.98 (s, 1H), 9.01 (d, *J* = 9.6 Hz, 1H), 12.61 (s, 1H). <sup>13</sup>C NMR (150 MHz, DMSO-*d*<sub>6</sub>) δ: 14.8, 61.0, 112.3, 117.2, 117.6, 119.5, 120.6, 120.8, 123.0, 123.6, 125.1, 126.17, 126.22, 128.8, 129.2, 129.8, 137.7, 139.8, 167.3. HRMS calcd for C<sub>19</sub>H<sub>15</sub>BrNO<sub>2</sub>: 368.0281 [M+H]<sup>+</sup>, found: 368.0285.

#### 4.3 Synthetic procedure and spectroscopic data of **8**

To a flask containing ethyl 2-bromo-11H-benzo[*a*]carbazole-5-carboxylate (**7**, 73 mg, 0.2 mmol) were added methanol (10 mL) and an aqueous solution of NaOH (2M, 0.5 mL). It was stirred under reflux for 3 h, and then cooled to room temperature. To the resulting mixture was added an aqueous solution of HCl (1M) dropwisely until the pH value was about 5. The mixture was then extracted with EtOAc (10 mL × 3). The combined organic phase was dried over anhydrous Na<sub>2</sub>SO<sub>4</sub>, and concentrated under reduced pressure. The residue was purified by silica gel chromatography using petroleum ether/ethyl acetate (2:1) as eluent to give **8**.

**2-Bromo-11H-benzo[*a*]carbazole-5-carboxylic acid (8)<sup>6</sup>:** Eluent: petroleum ether-ethyl acetate (2:1); white solid (63 mg, 93%); mp: 260-261 °C; <sup>1</sup>H NMR (400 MHz, DMSO-*d*<sub>6</sub>) δ: 7.3 (t, *J* = 7.6 Hz, 1H), 7.49 (t, *J* = 8.0 Hz, 1H), 7.69 (d, *J* = 8.0 Hz, 1H), 7.79 (dd, *J*<sub>1</sub> = 9.6 Hz, *J*<sub>2</sub> = 2.0 Hz, 1H), 8.30 (d, *J* = 8.4 Hz, 1H), 8.88 (d, *J* = 1.6 Hz, 1H), 9.09 (s, 1H), 9.20 (d, *J* = 9.2 Hz, 1H), 12.63 (s, 1H), 12.88 (br s, 1H). <sup>13</sup>C NMR (100 MHz, DMSO-*d*<sub>6</sub>) δ: 14.3, 60.0, 95.6, 107.6, 111.6, 114.1, 117.8, 120.3, 121.0, 122.4, 124.0, 124.5, 127.8, 129.2, 130.9, 137.6, 138.5, 148.6, 169.0. HRMS calcd for C<sub>17</sub>H<sub>9</sub>BrNO<sub>2</sub>: 337.9822 [M-H]<sup>-</sup>, found: 337.9826.



### III. Mechanism studies

#### 1. A control experiment

1-Methyl-2-phenyl-1*H*-indole (**6**, 0.5 mmol), ethyl 2-diazo-3-oxo-3-phenylpropanoate (**2a**, 0.75 mmol), [RhCp\*Cl<sub>2</sub>]<sub>2</sub> (0.025 mmol), Cu(OAc)<sub>2</sub> (0.1 mmol), and CH<sub>3</sub>CN (3 mL) were charged into a sealed tube. The mixture was then stirred at 120 °C for 18 h. From the resulting mixture, 93% of **6** was recovered.

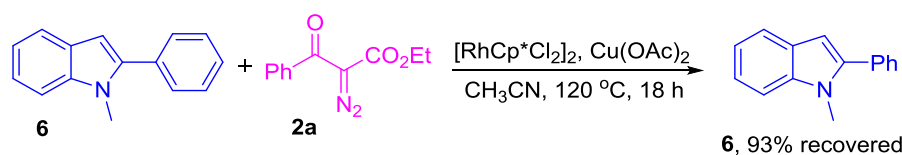

**Scheme 1.** A control experiment

#### 2. The intramolecular KIE experiment

2-(Phenyl-2-*d*)-1*H*-indole (**1a-d**<sub>1</sub>, 0.5 mmol), ethyl 2-diazo-3-oxo-3-phenylpropanoate (**2a**, 0.75 mmol), [RhCp\*Cl<sub>2</sub>]<sub>2</sub> (0.025 mmol), Cu(OAc)<sub>2</sub> (0.05 mmol), and CH<sub>3</sub>CN (3 mL) were charged into a sealed tube. The mixture was then stirred at 120 °C for 4 h. Afterwards, it was cooled to room temperature, quenched with saturated brine (10 mL), and extracted with EtOAc (10 mL × 3). The combined organic phase was dried over anhydrous Na<sub>2</sub>SO<sub>4</sub> and concentrated under reduced pressure. The residue was purified by silica gel chromatography using petroleum ether/ethyl acetate (10:1) as eluent to afford a mixture of **3a** and **3a-d**<sub>1</sub>. Upon analyzing the corresponding <sup>1</sup>H NMR spectrum as shown in Fig 1, the ratio of **3a** and **3a-d**<sub>1</sub> in the resulting mixture was determined as 0.65:0.35. Accordingly, the intramolecular KIE (*k*<sub>H</sub>/*k*<sub>D</sub>) was calculated as 1.86.

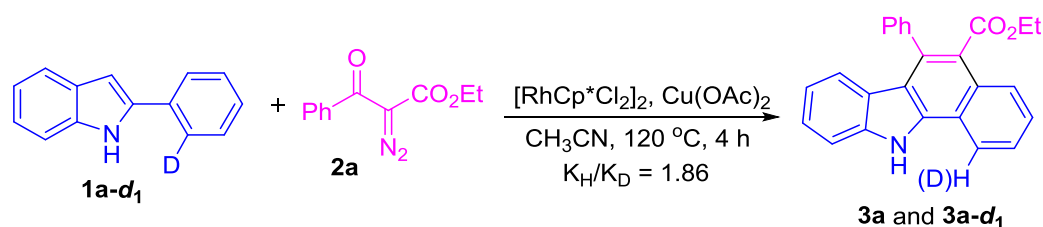

**Scheme 2.** The intramolecular KIE experiment

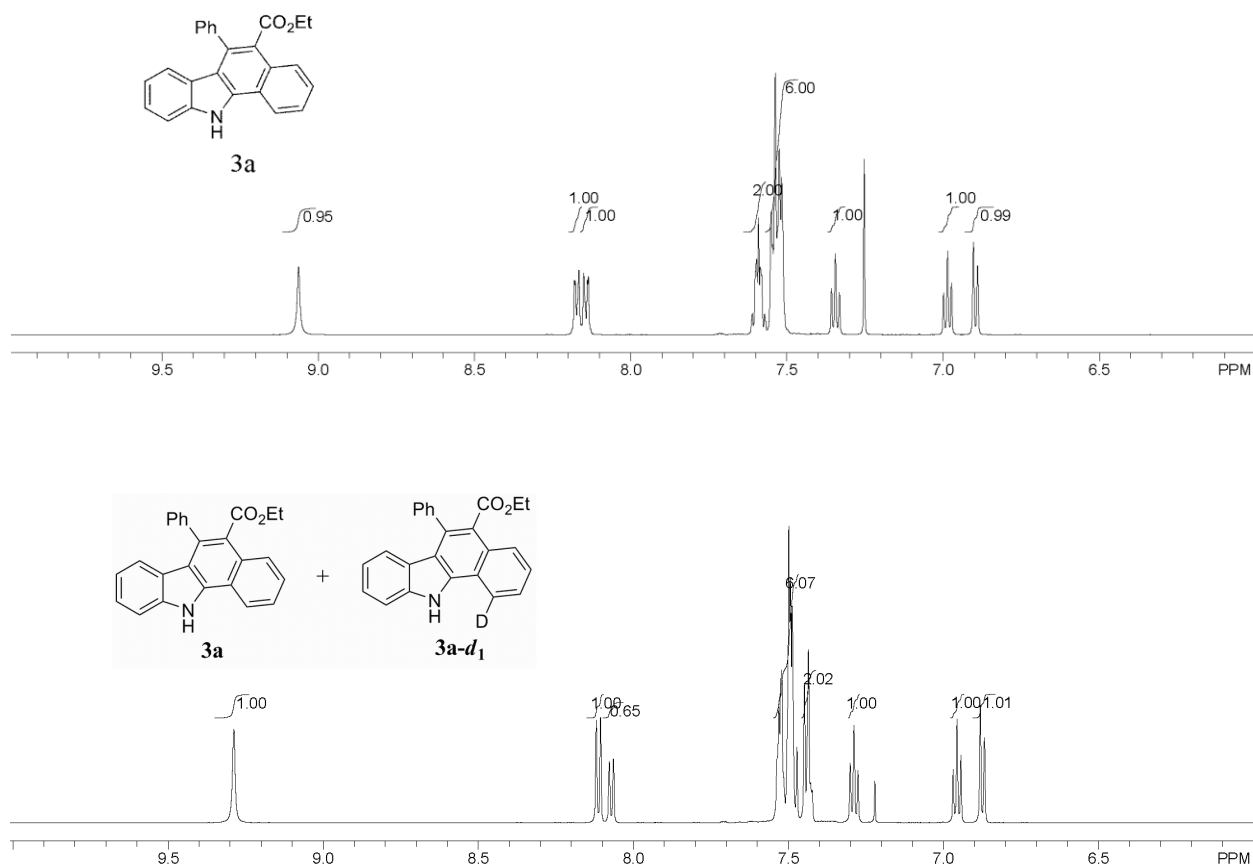

**Fig 1.** The  $^1\text{H}$  NMR spectrum of the products obtained from the intramolecular KIE experiment

### 3. The intermolecular KIE experiments

2-Phenyl-1*H*-indole (**1a**, 0.25 mmol), 2-phenyl-*d*<sub>5</sub>-1*H*-indole (**1a-d**<sub>5</sub>, 0.25 mmol), ethyl 2-diazo-3-oxo-3-phenylpropanoate (**2a**, 0.5 mmol),  $[\text{RhCp}^*\text{Cl}_2]_2$  (0.025 mmol),  $\text{Cu}(\text{OAc})_2$  (0.05 mmol), and  $\text{CH}_3\text{CN}$  (3 mL) were charged into a sealed tube. The mixture was then stirred at 120 °C for 4 h. Afterwards, it was cooled to room temperature, quenched with saturated brine (10 mL), and extracted with EtOAc (10 mL  $\times$  3). The combined organic phase was dried over anhydrous  $\text{Na}_2\text{SO}_4$  and concentrated under reduced pressure. The residue was purified by silica gel chromatography using petroleum ether/ethyl acetate (10:1) as eluent to afford a mixture of **3a** and **3a-d**<sub>4</sub>. Upon analyzing the corresponding  $^1\text{H}$  NMR spectrum as shown in Fig 2, the ratio of **3a** and **3a-d**<sub>4</sub> was determined as 1.41:0.59. Accordingly, the intermolecular KIE ( $K_{\text{H}}/K_{\text{D}}$ ) was calculated as 2.39.

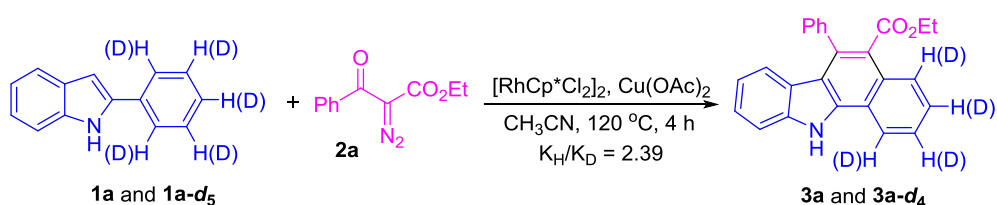

**Scheme 3.** The intermolecular KIE experiment

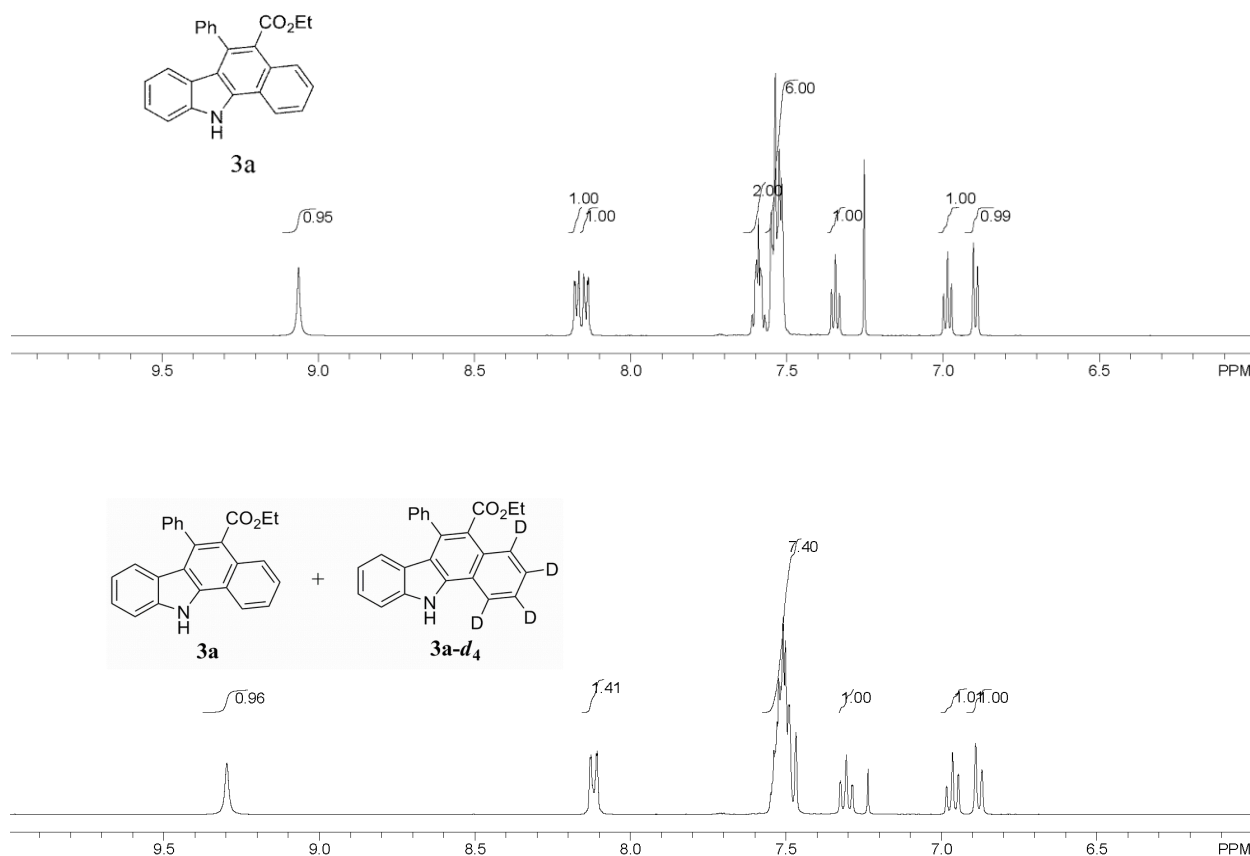

**Fig 2.** The <sup>1</sup>H NMR spectrum of the products obtained from the intermolecular KIE experiment

#### 4. Identification of benzoic acid from the reaction mixture of 4a with 2a by GC-MS

3-Cyano-2-phenylindole (**4a**, 0.5 mmol), ethyl 2-diazo-3-oxo-3-phenylpropanoate (**2a**, 0.75 mmol), [RhCp\*Cl<sub>2</sub>]<sub>2</sub> (0.025 mmol), AgOAc (0.1 mmol), AgSbF<sub>6</sub> (0.1 mmol), and CH<sub>3</sub>CN (3 mL) were charged into a sealed tube. The mixture was then stirred at 120 °C for 8 h. Afterwards, it was cooled to room temperature, and filtered. A GC-MS study of the resulting mixture thus obtained showed that benzoic acid was formed.

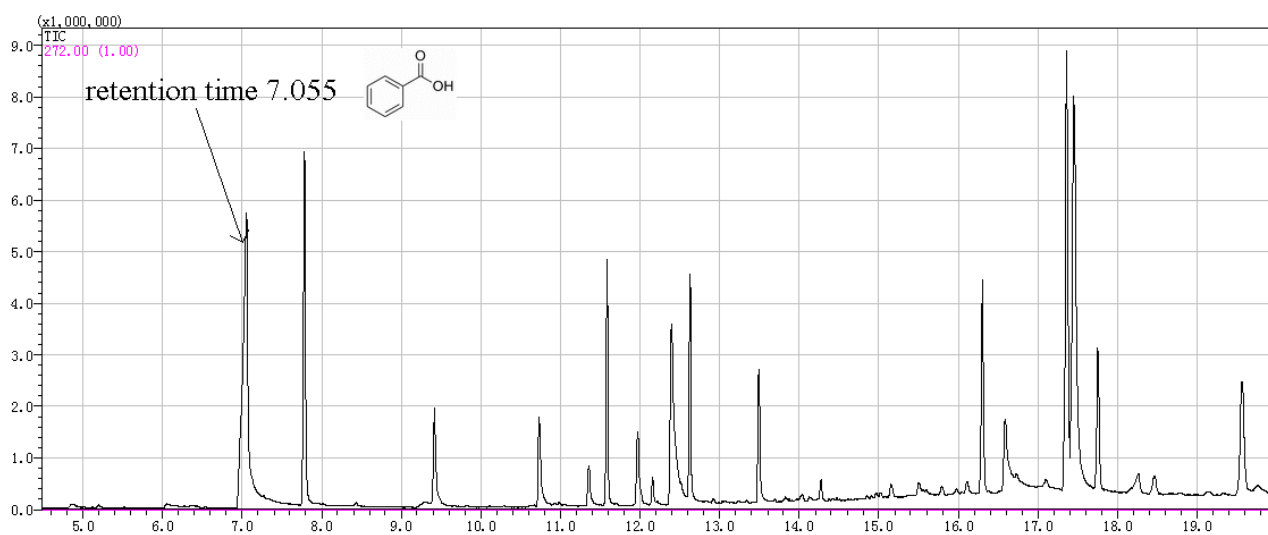

**Fig 3.** GC spectrum of the resulting mixture from the reaction of **4a** with **2a**

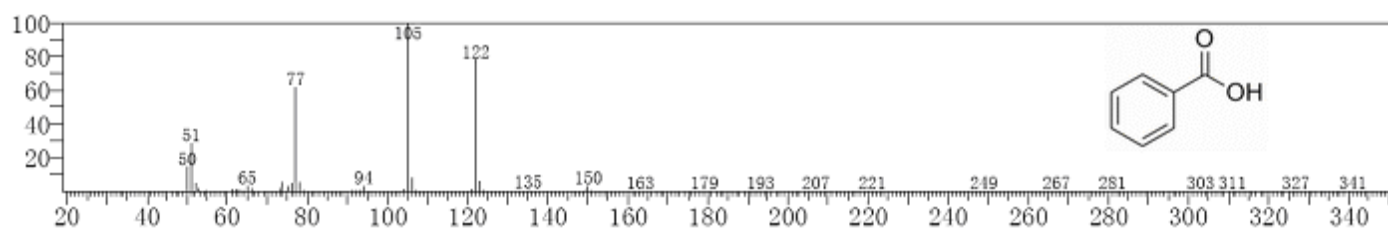

**Fig 4.** MS spectrum of the compound with a retention time of 7.055

# IV. Copies of $^1\text{H}$ and $^{13}\text{C}$ NMR spectra of 3a-3y

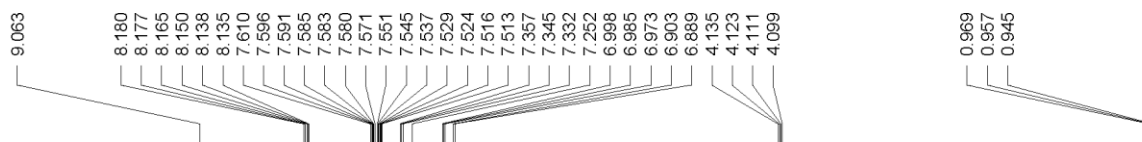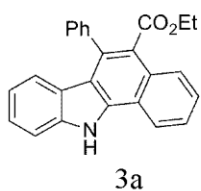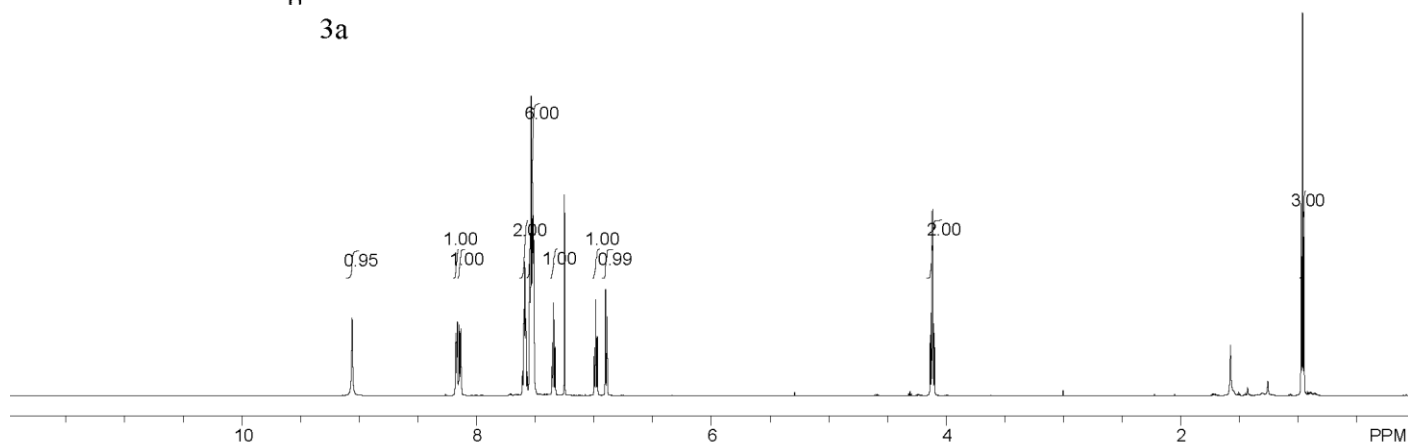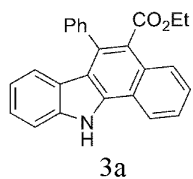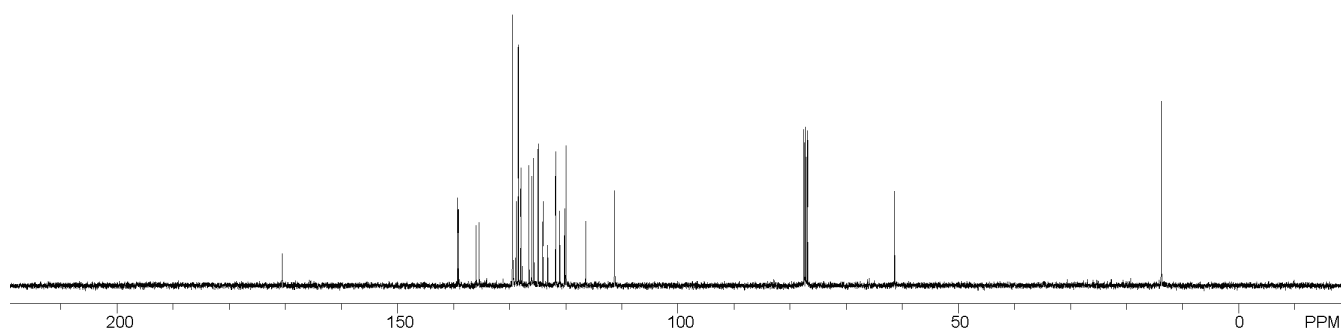

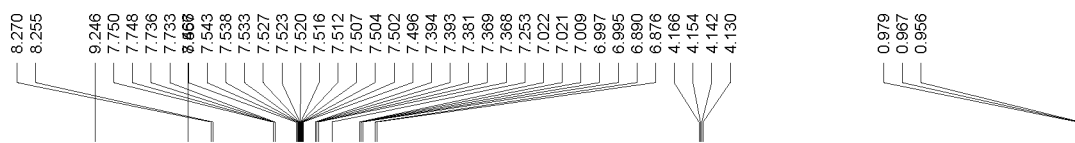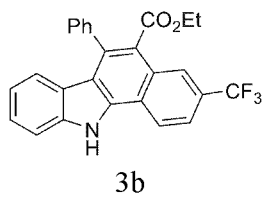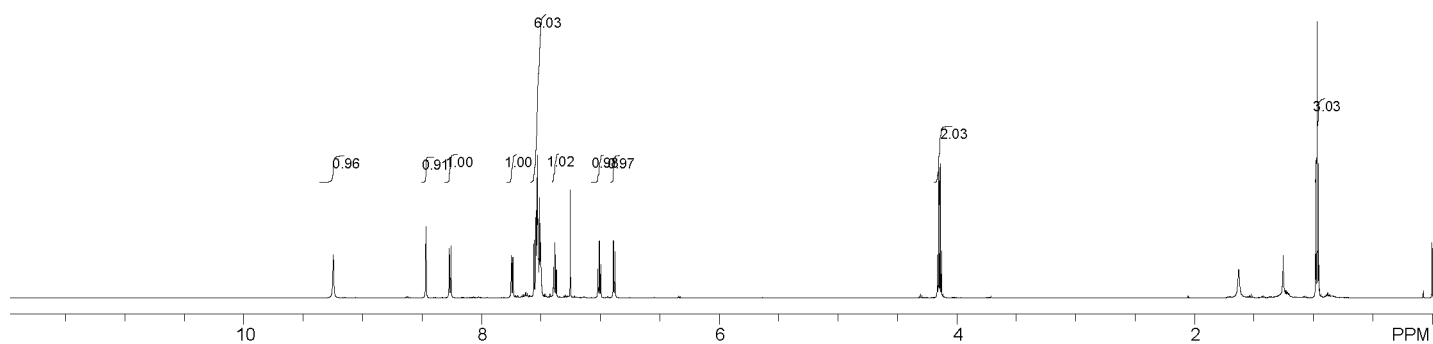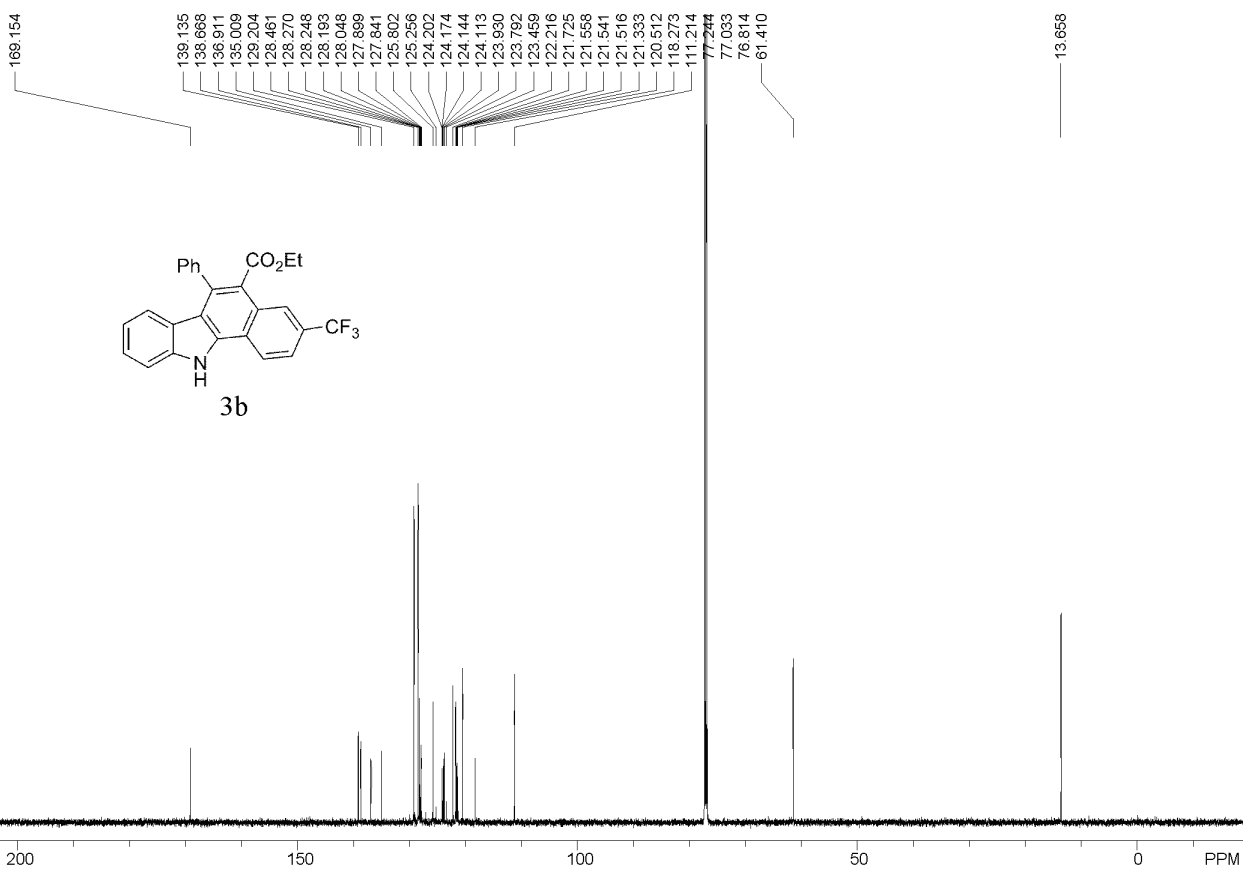

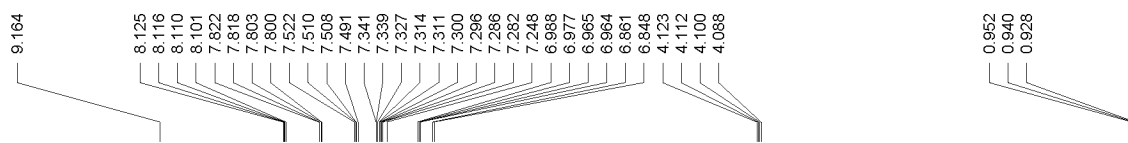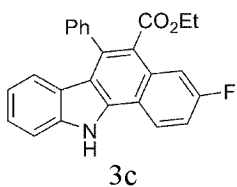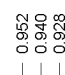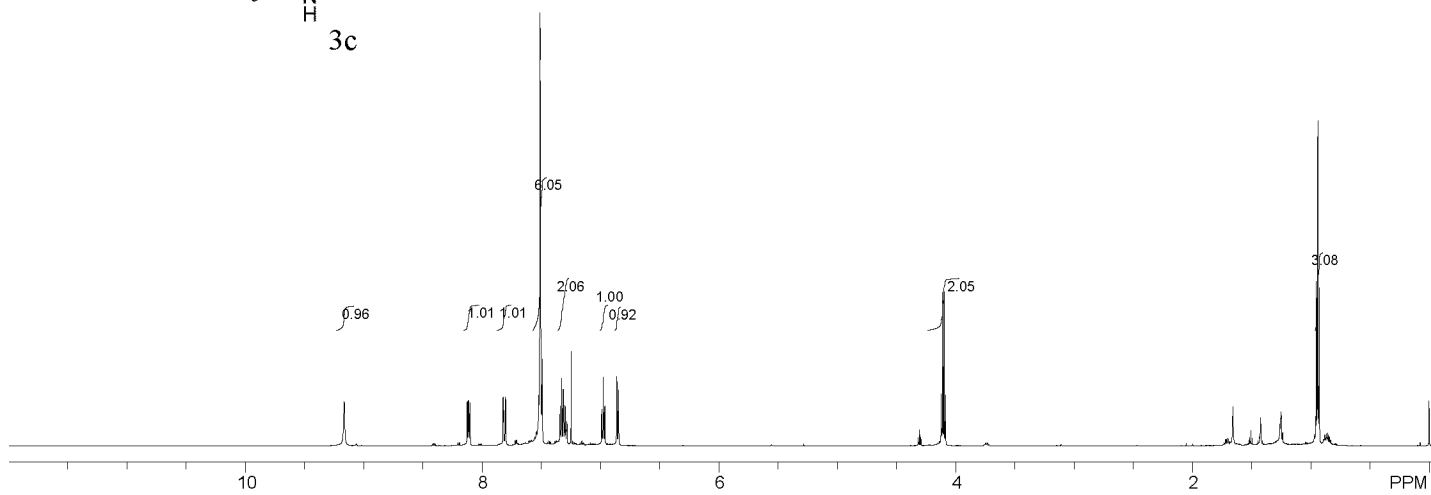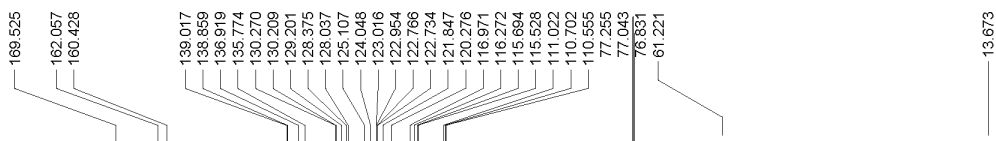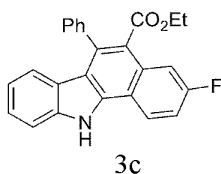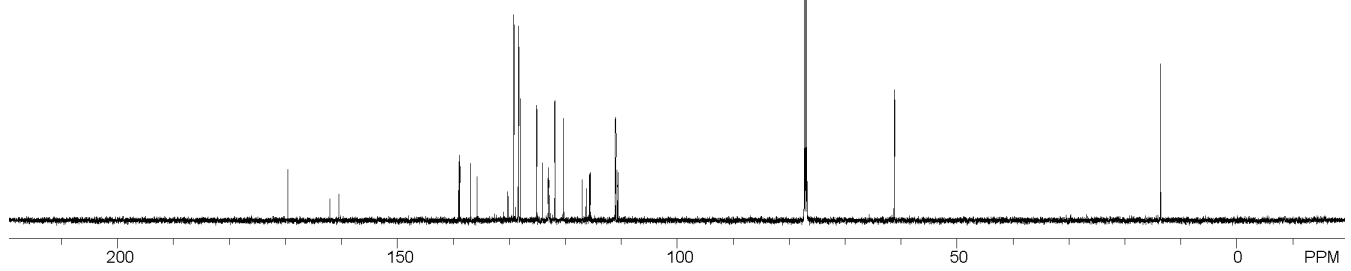

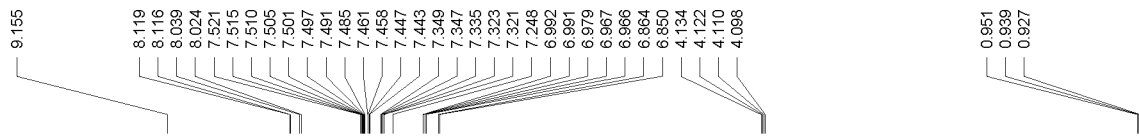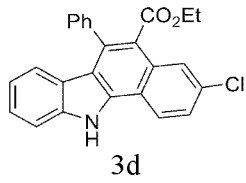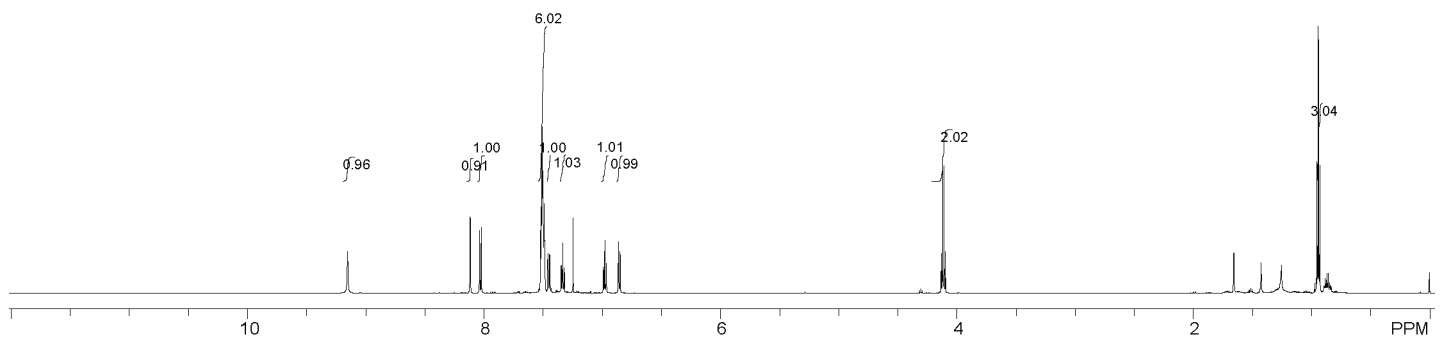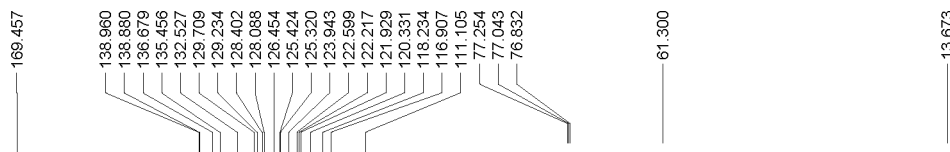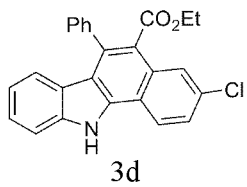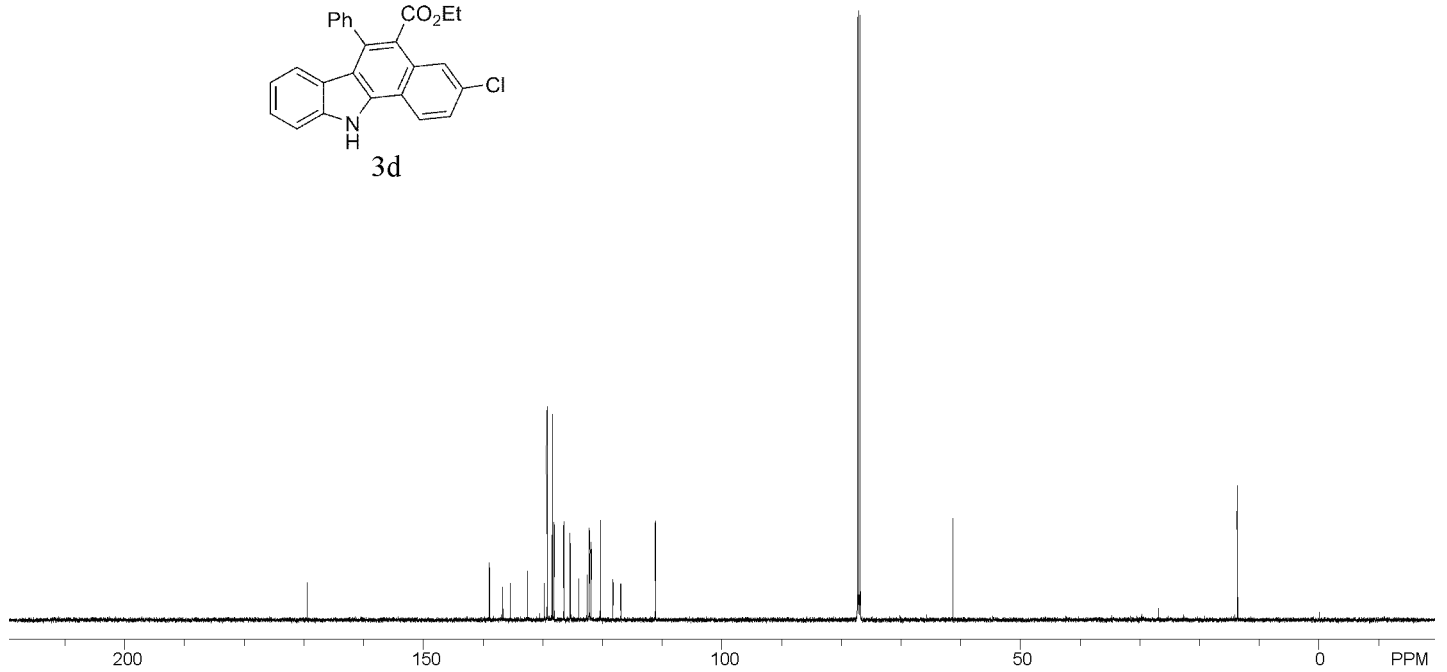



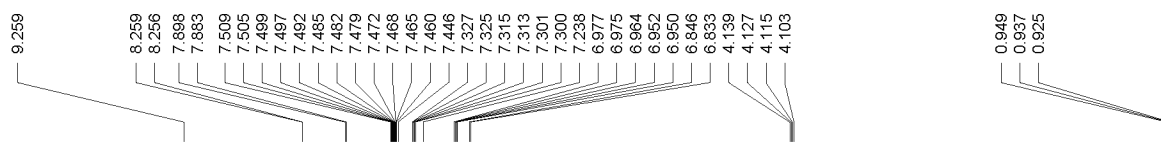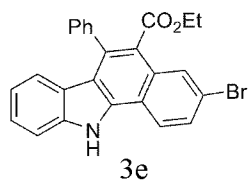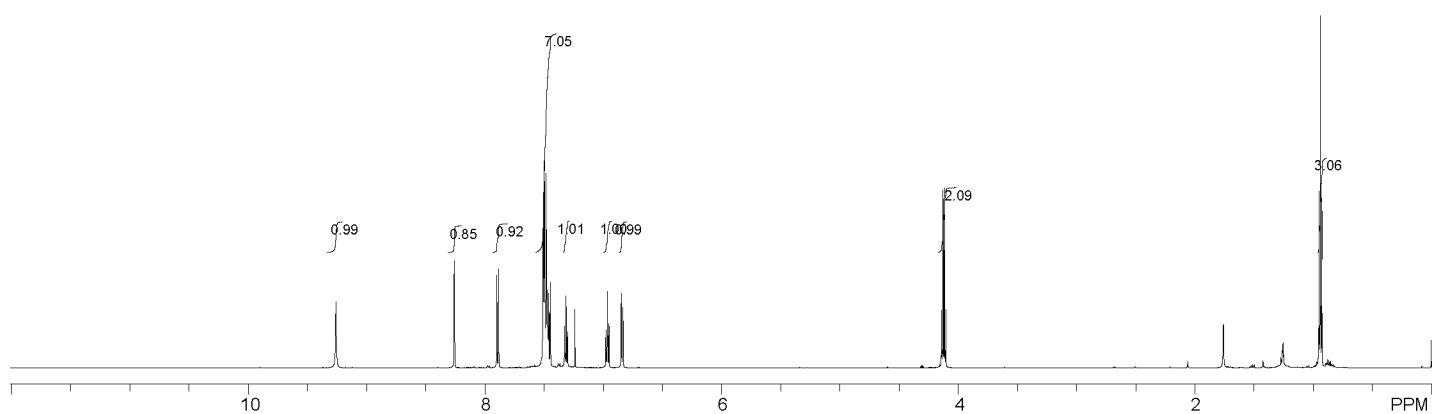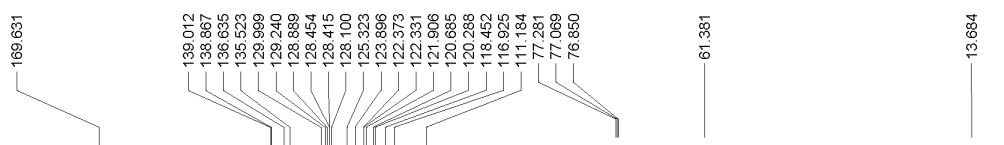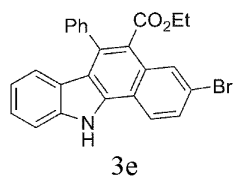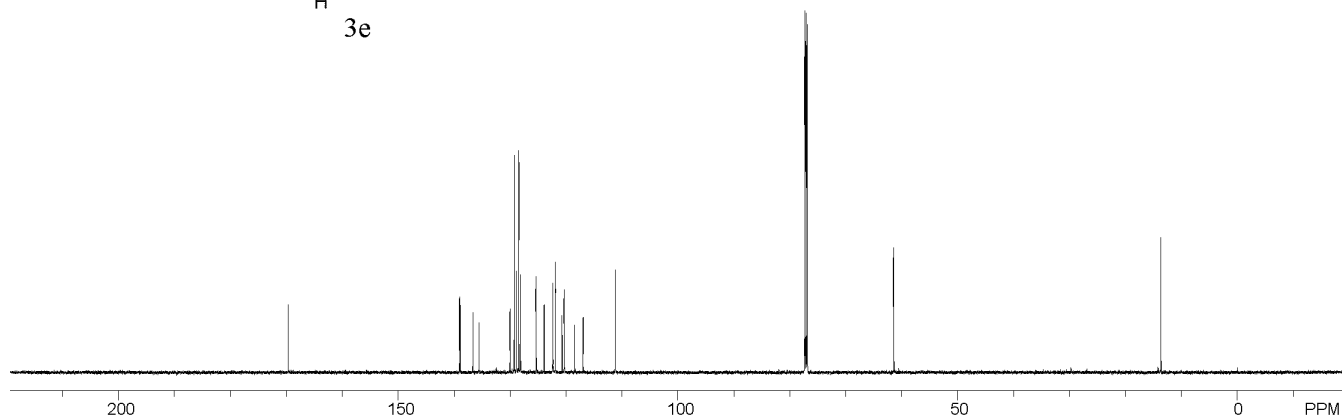

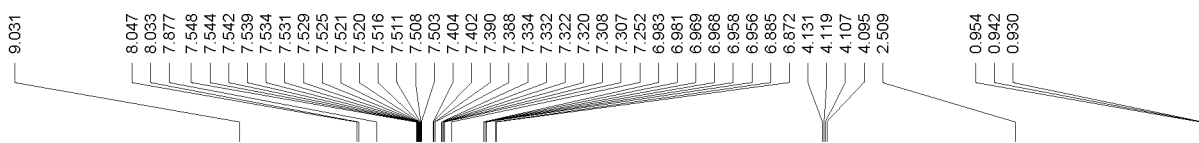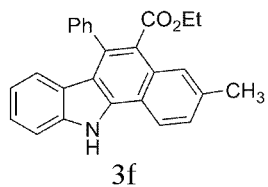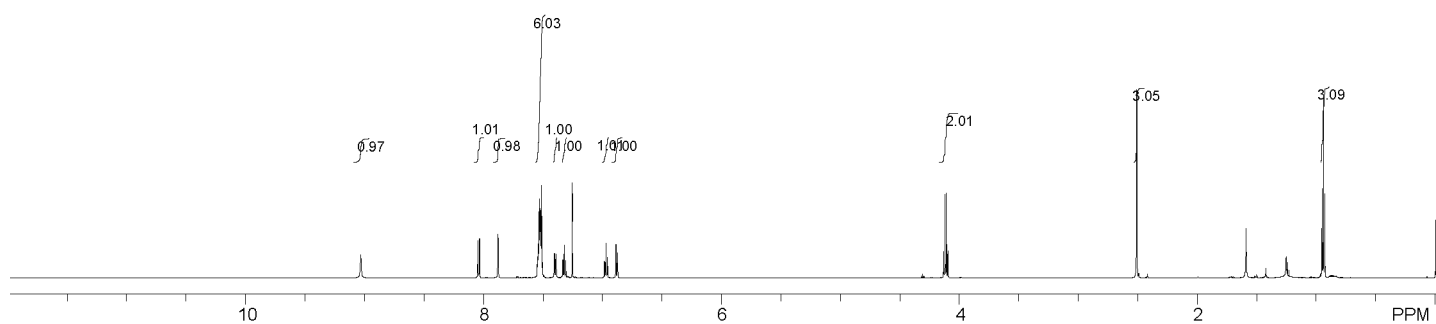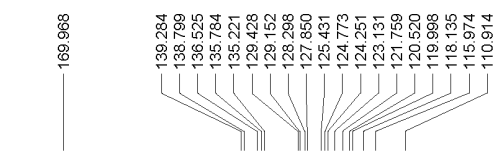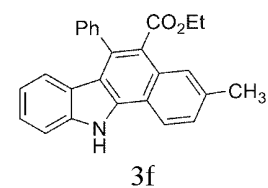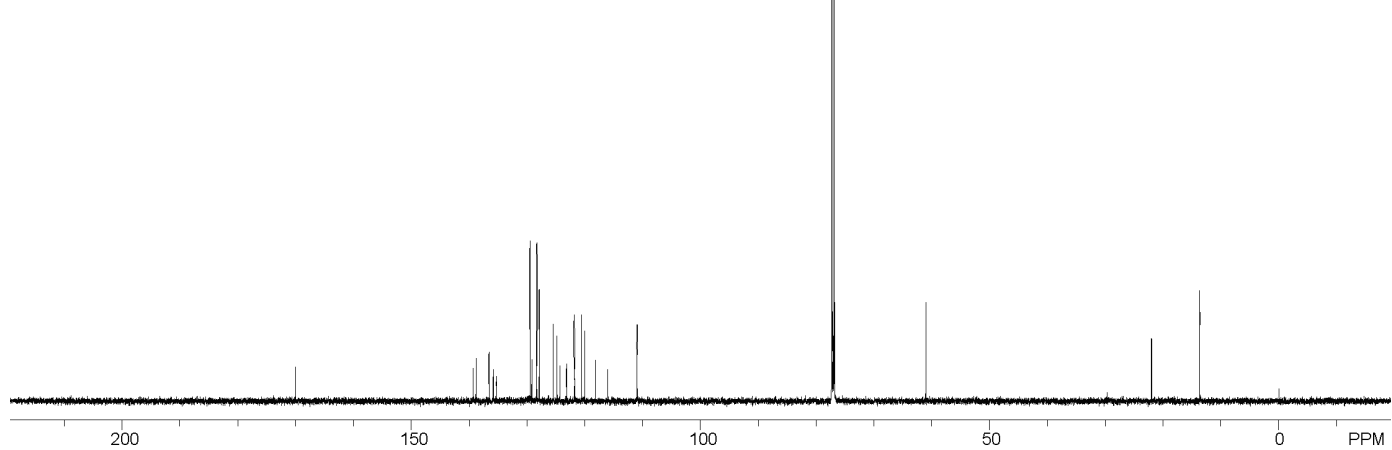

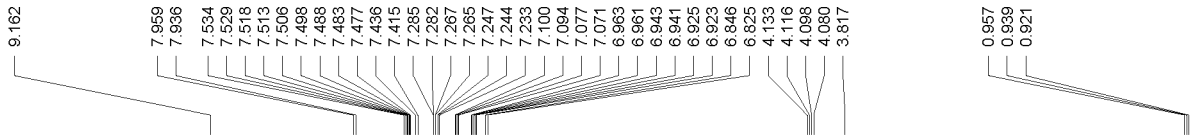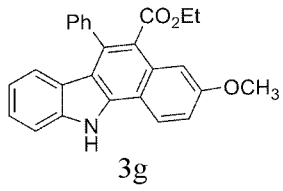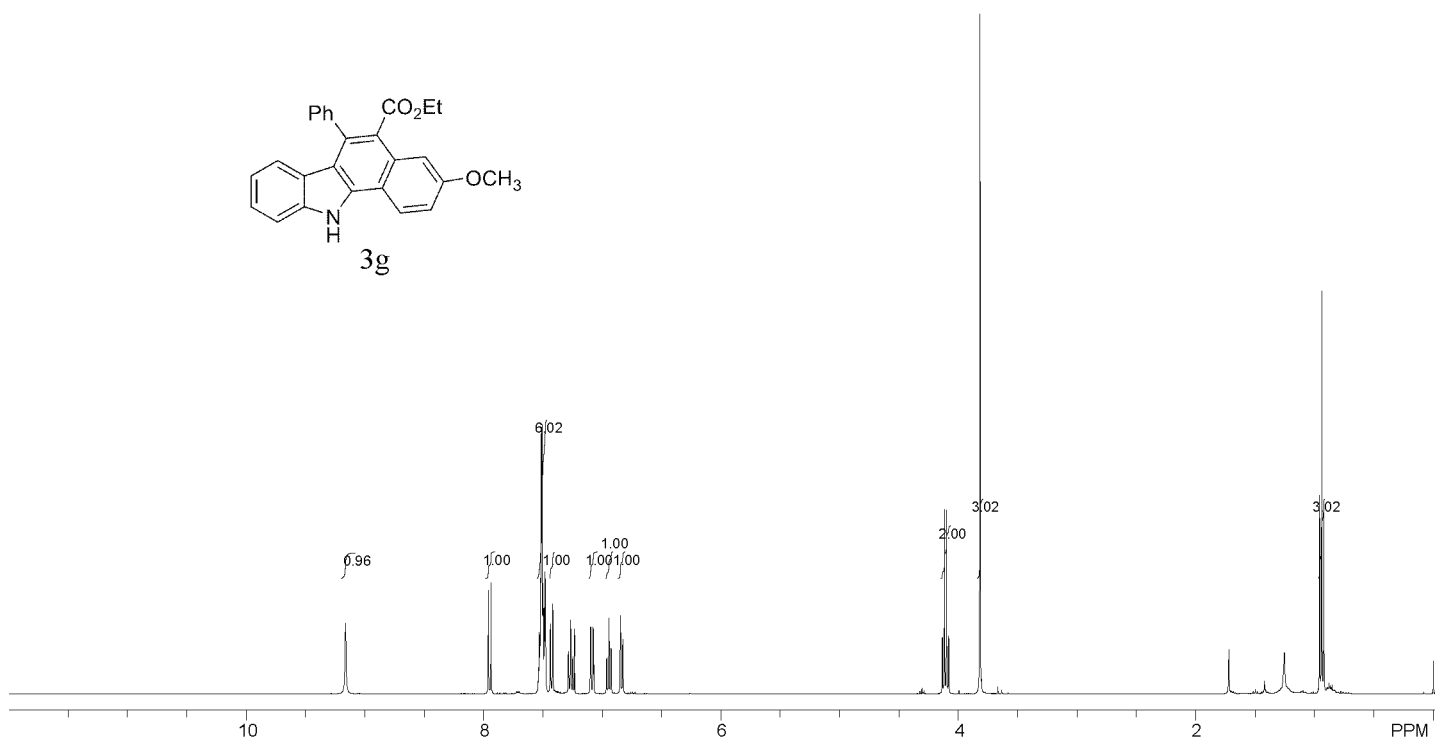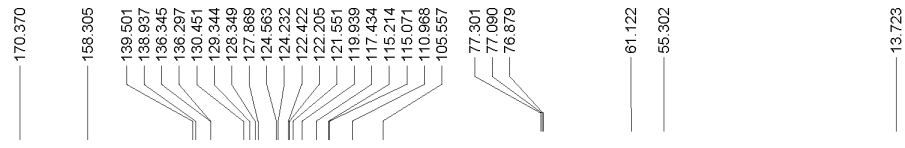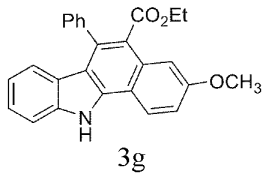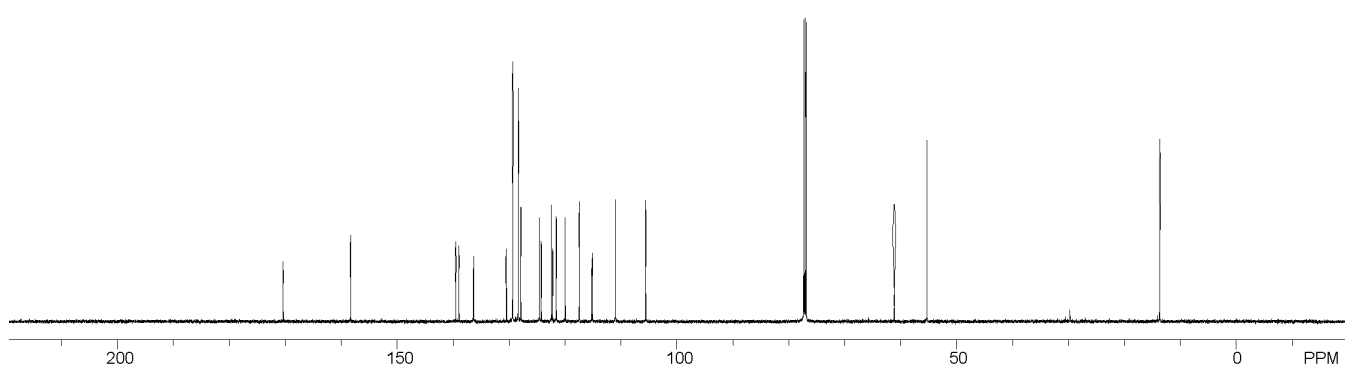

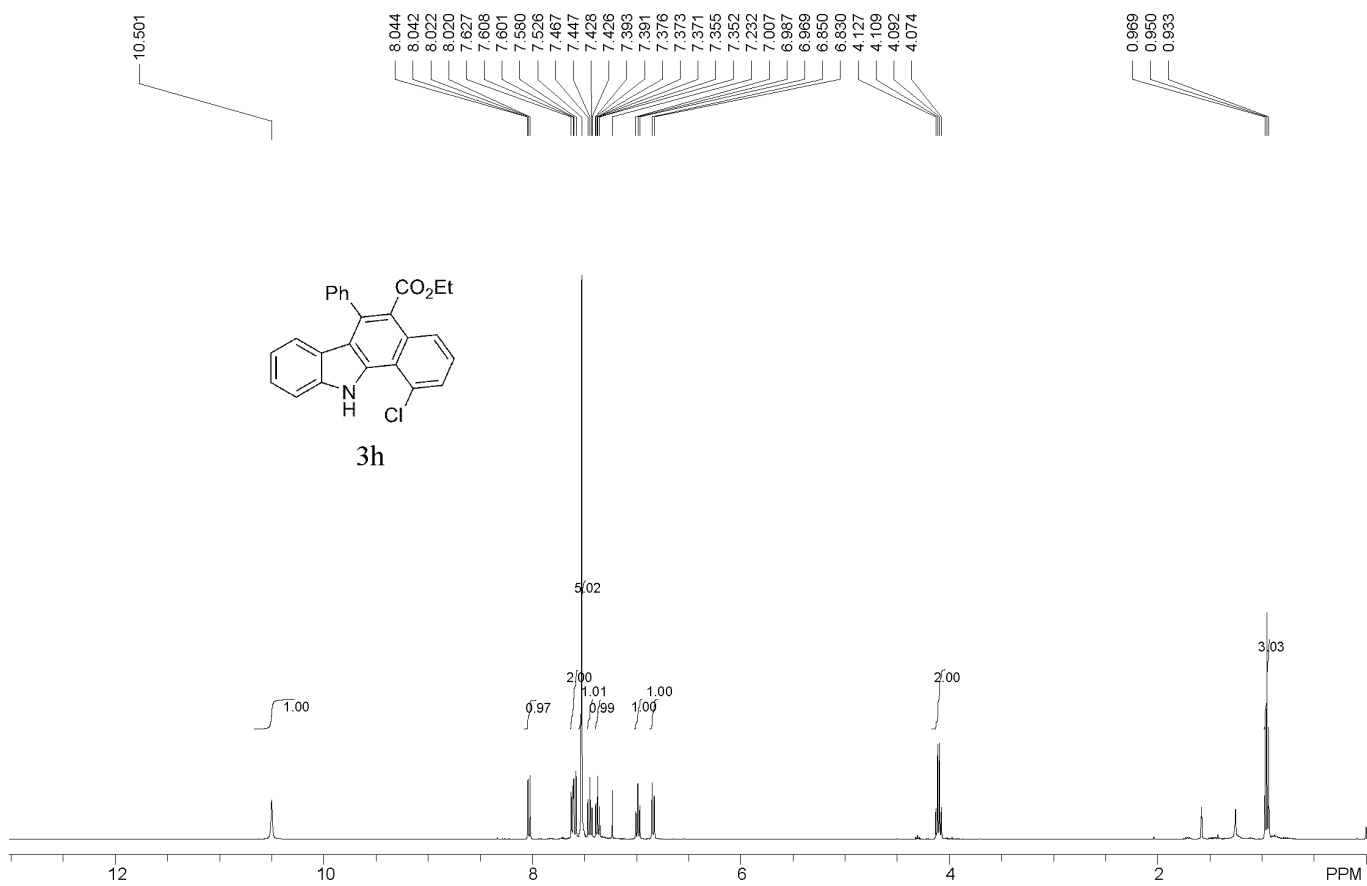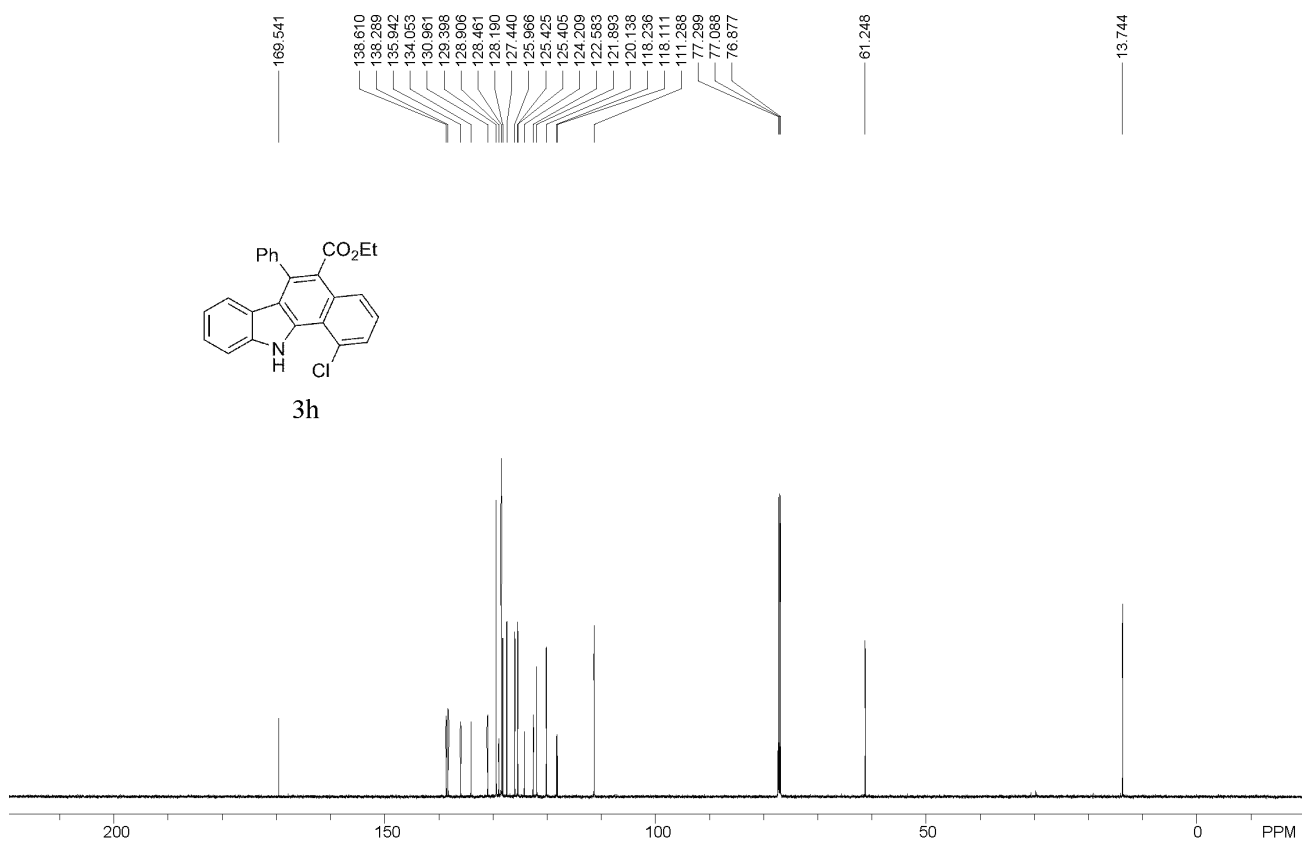

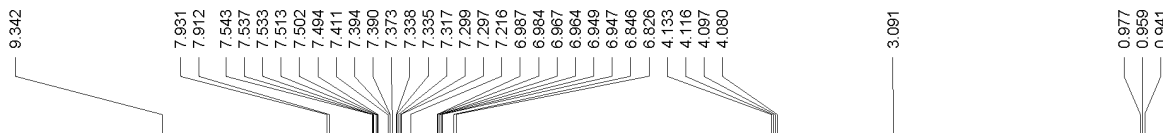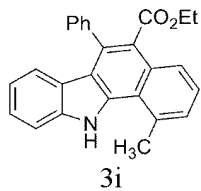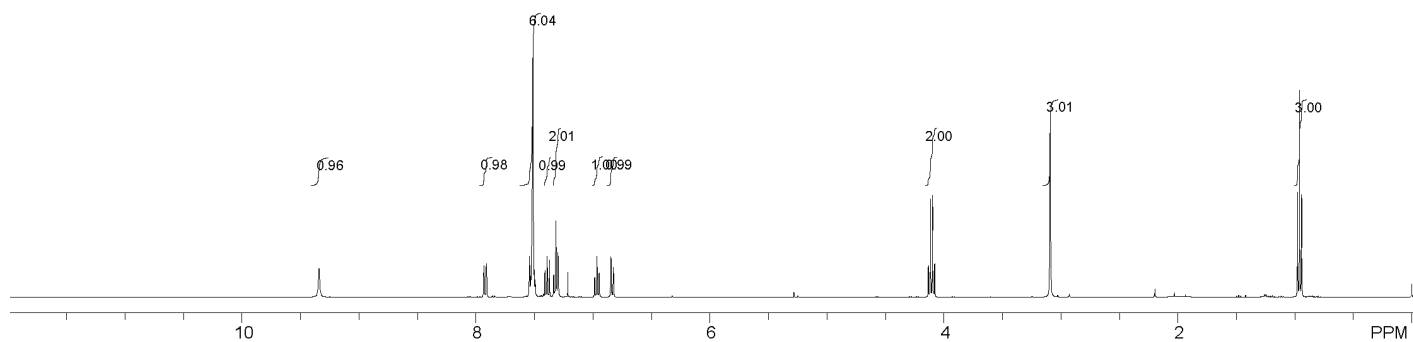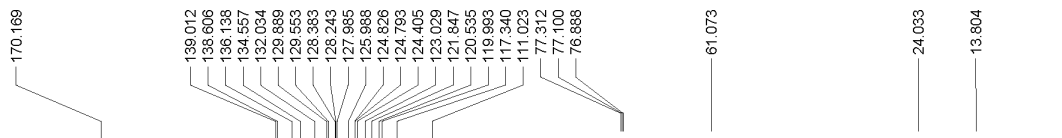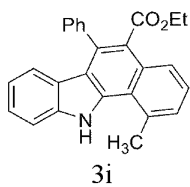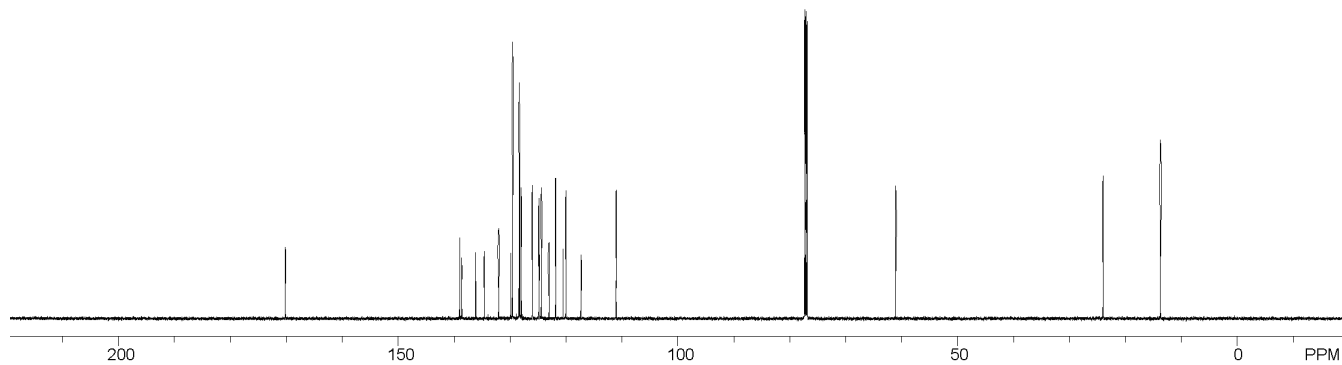

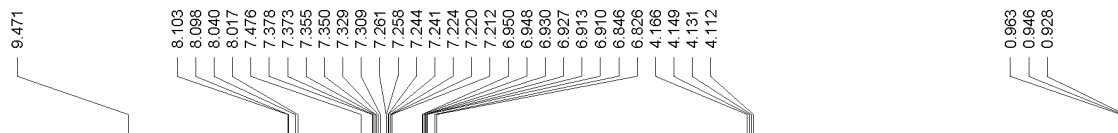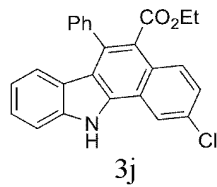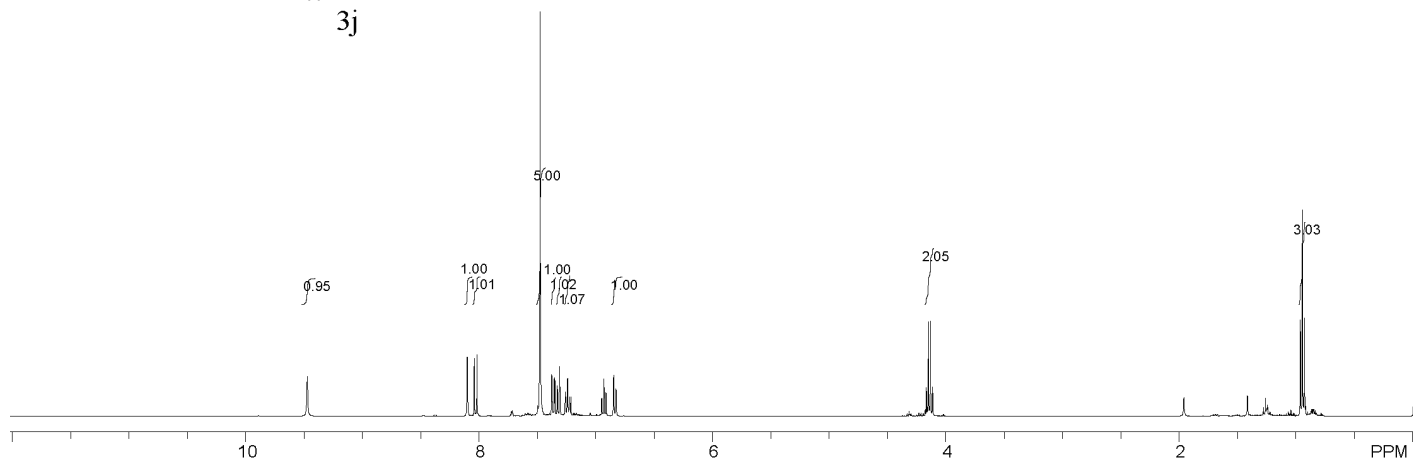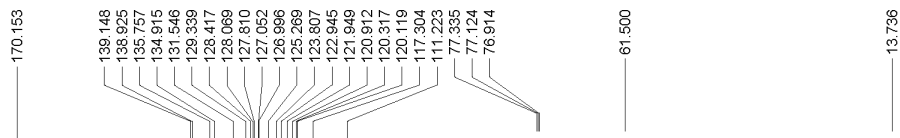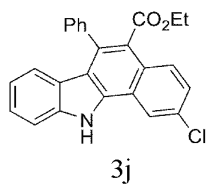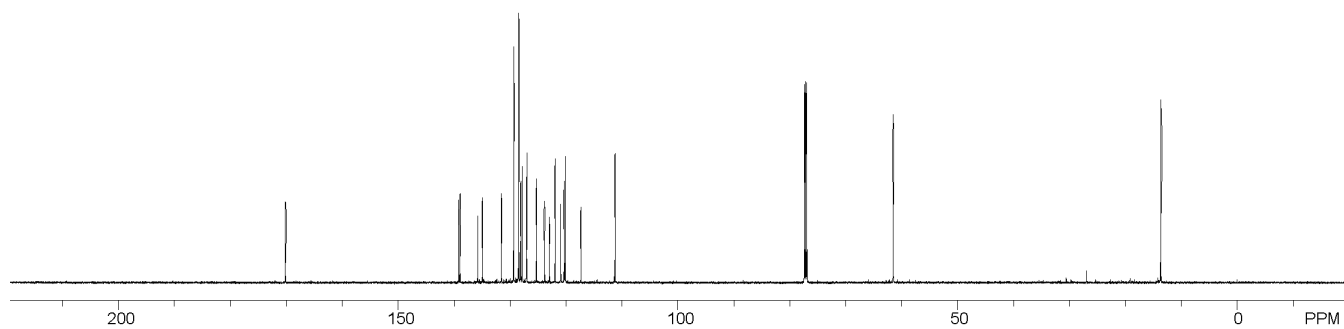

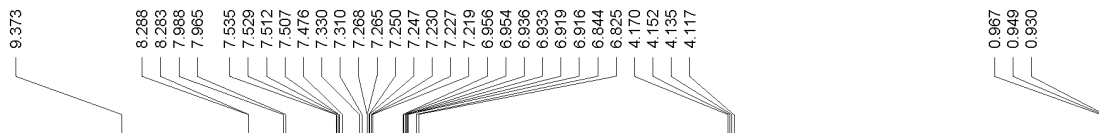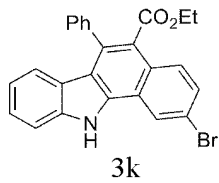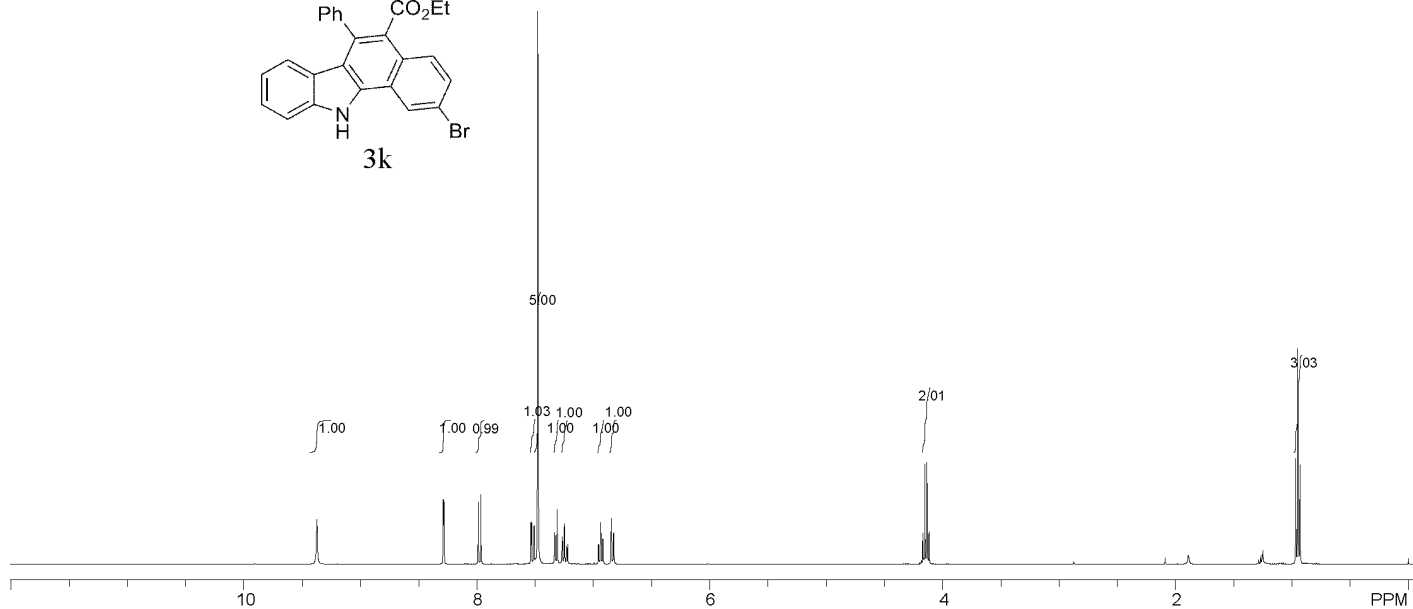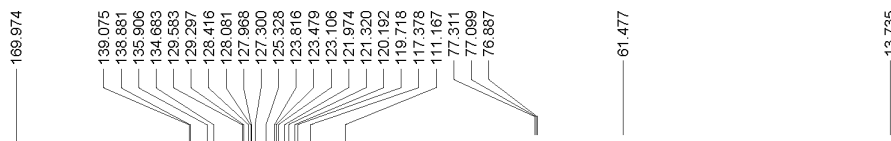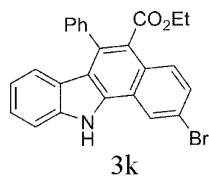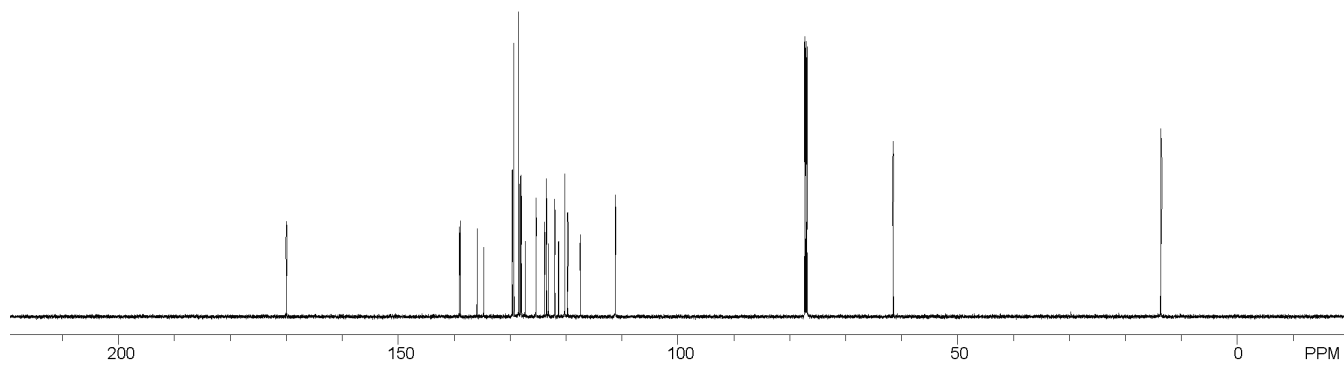

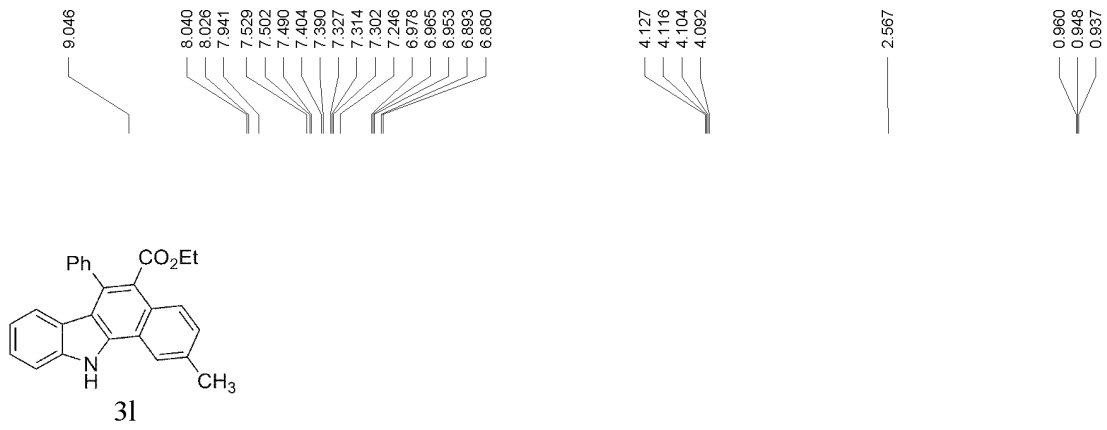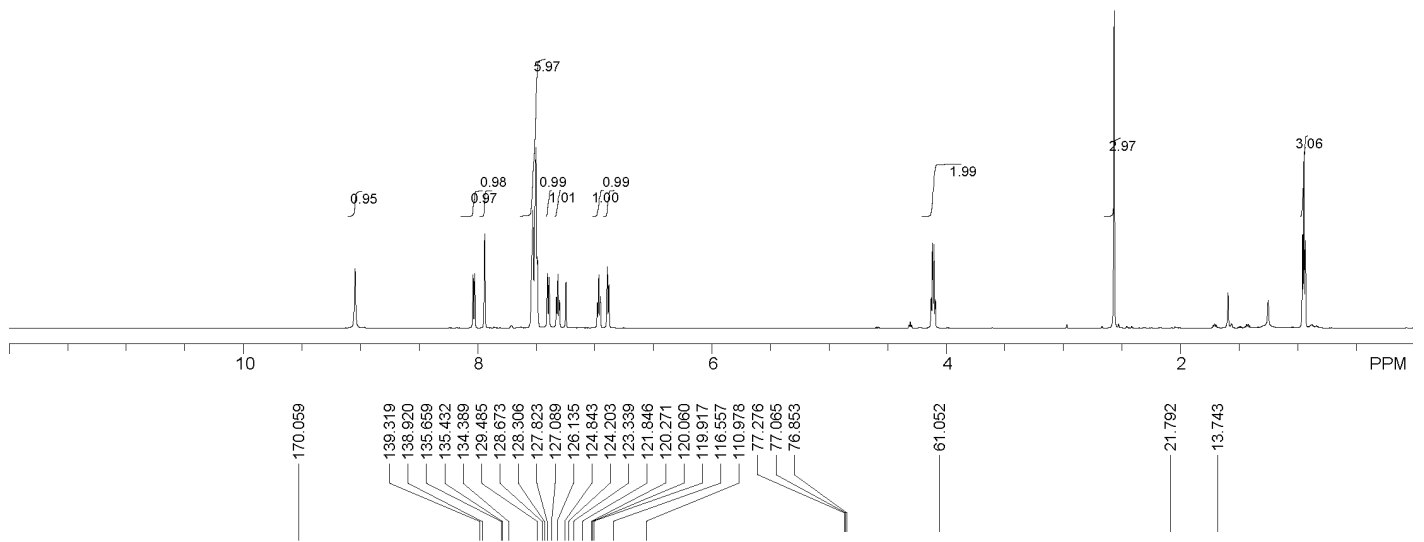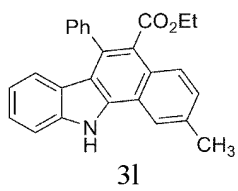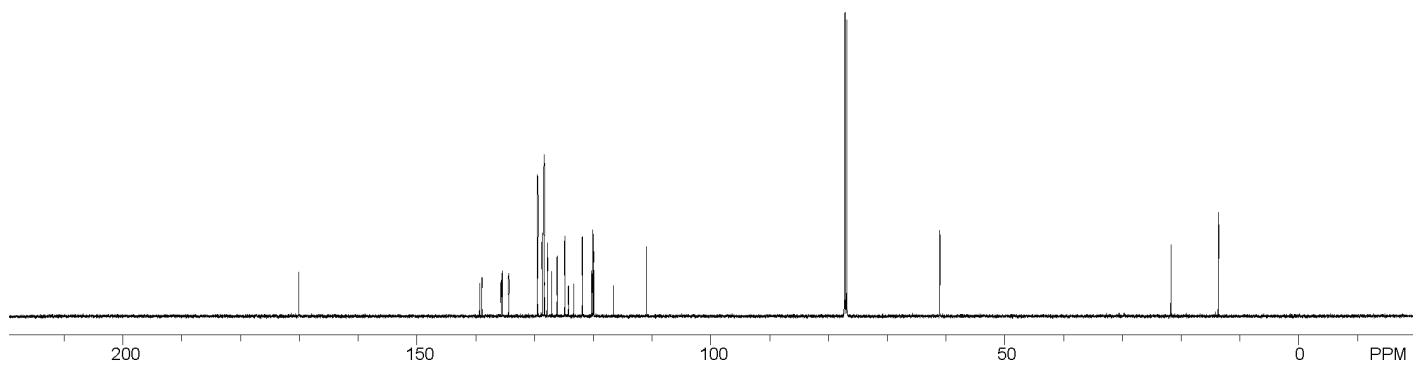



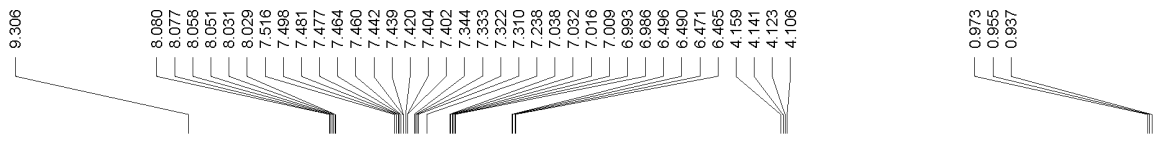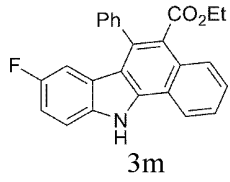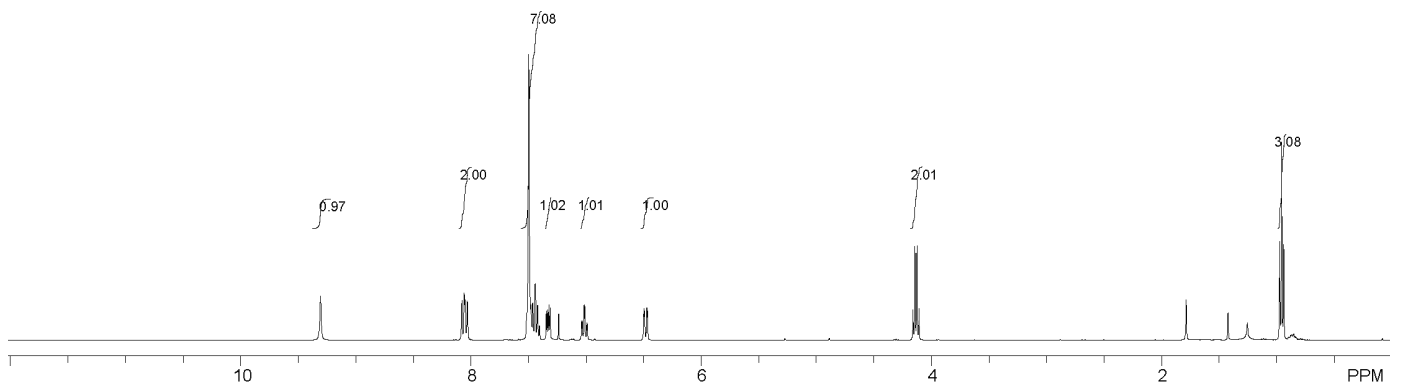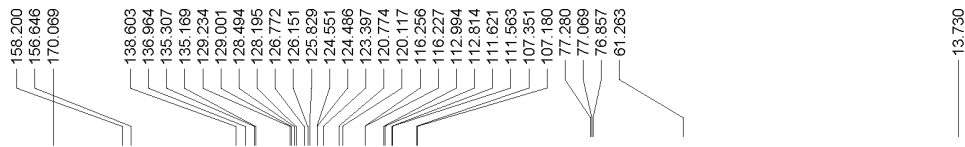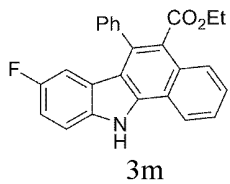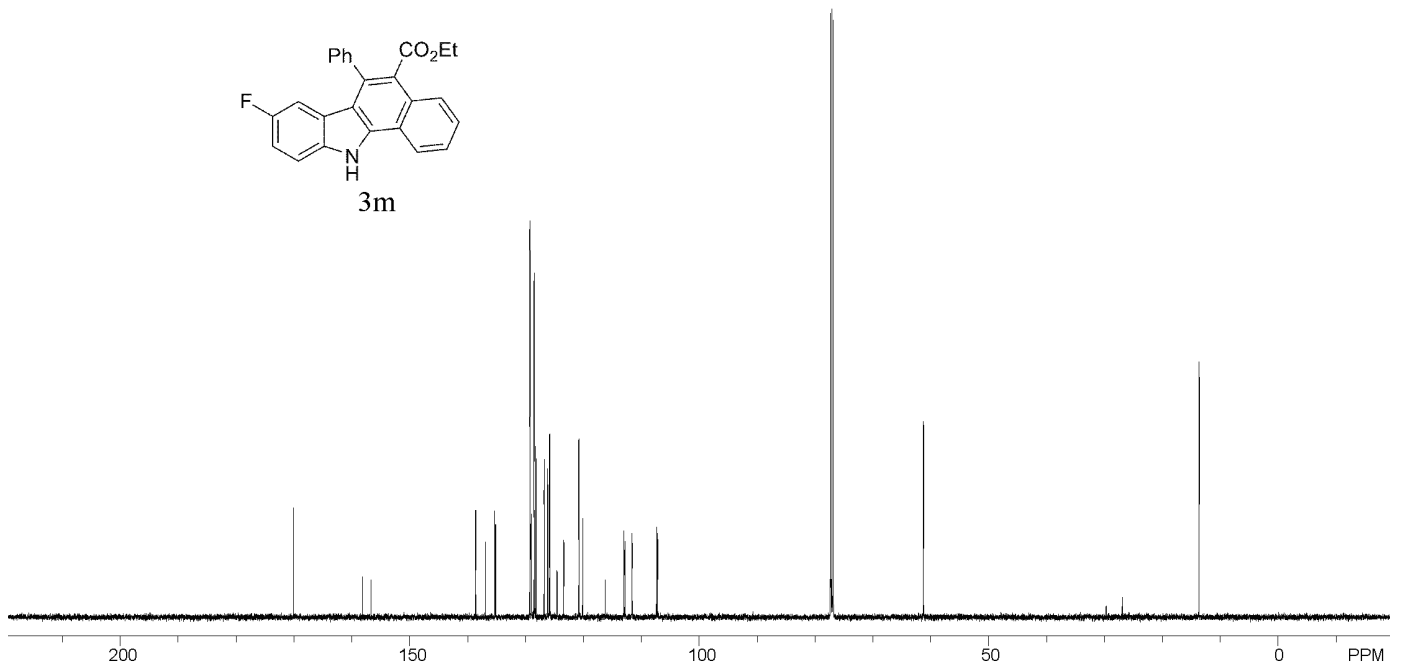

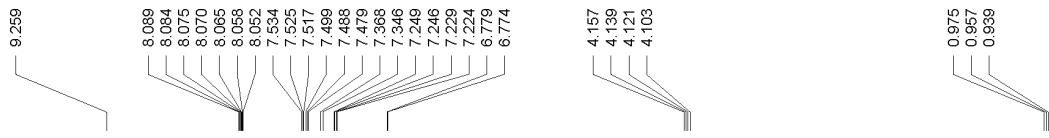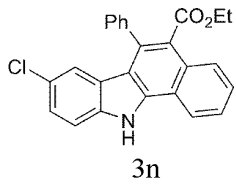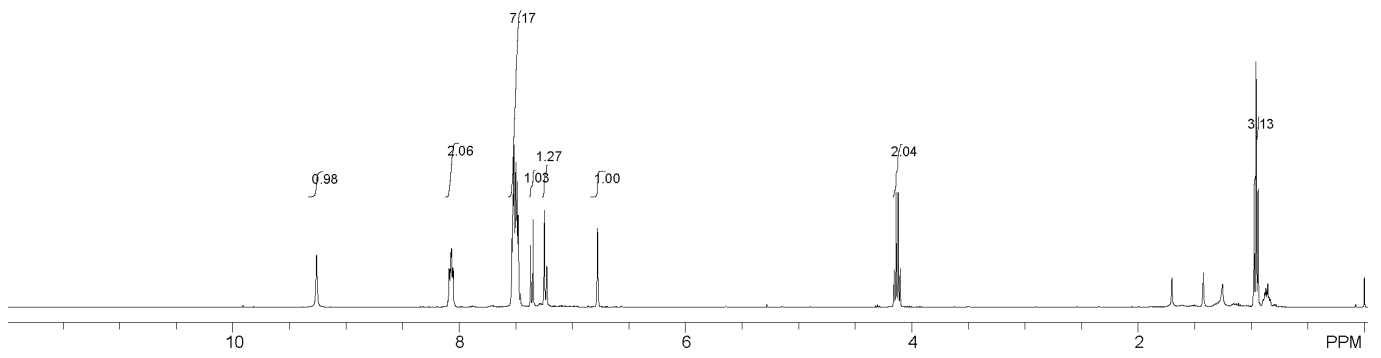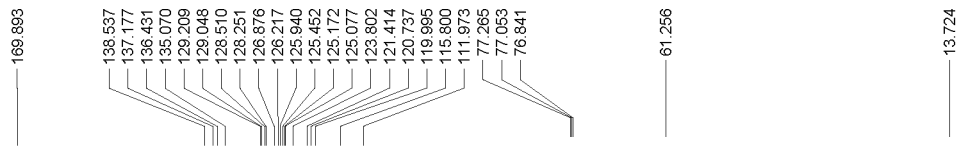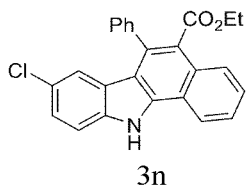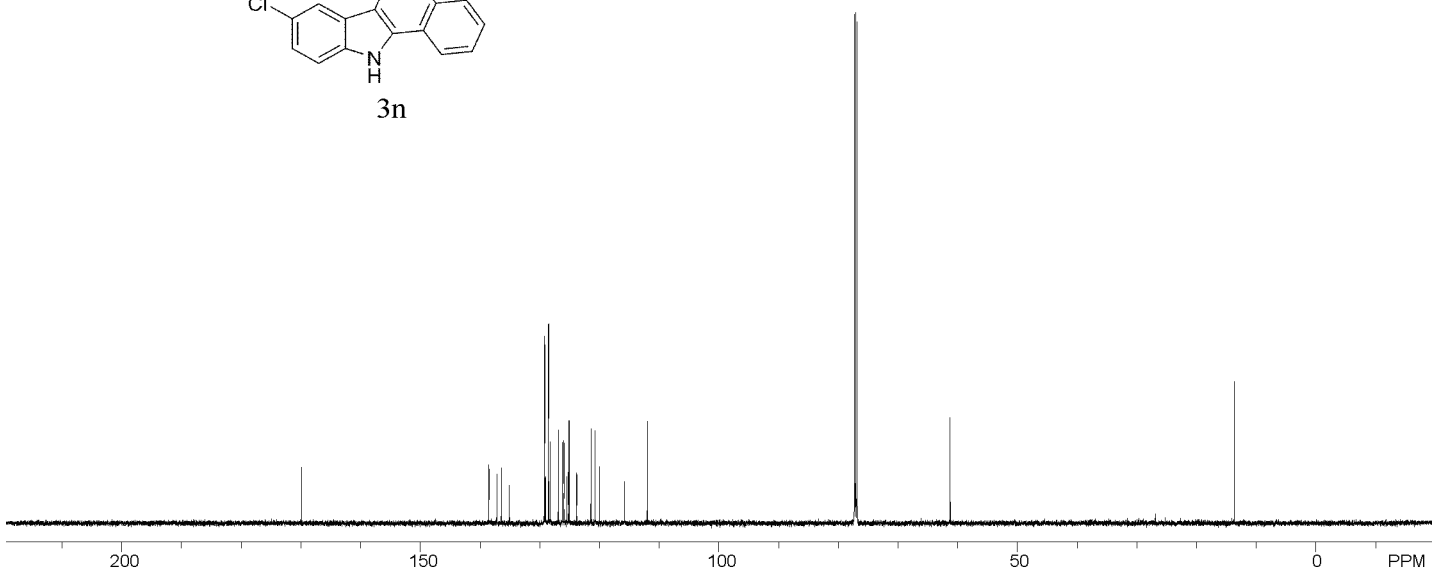

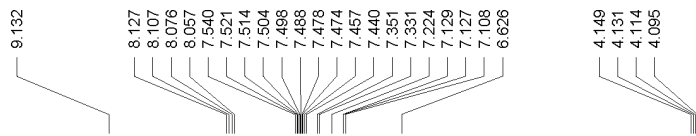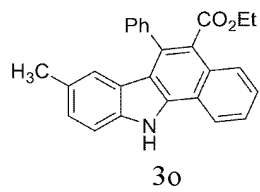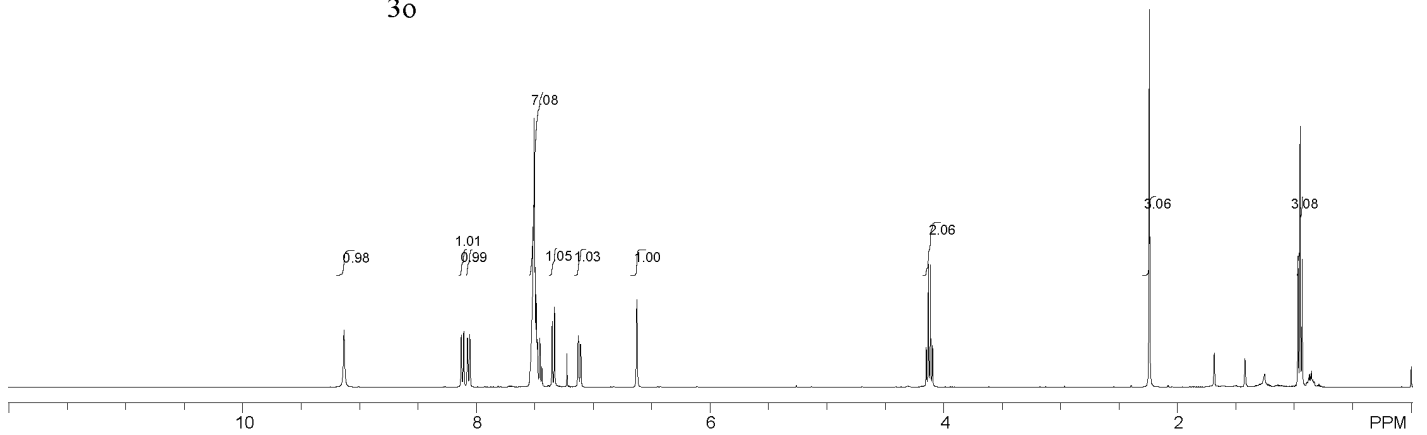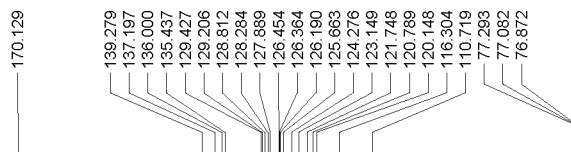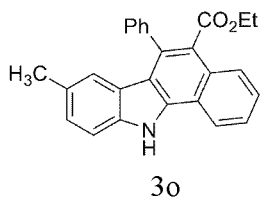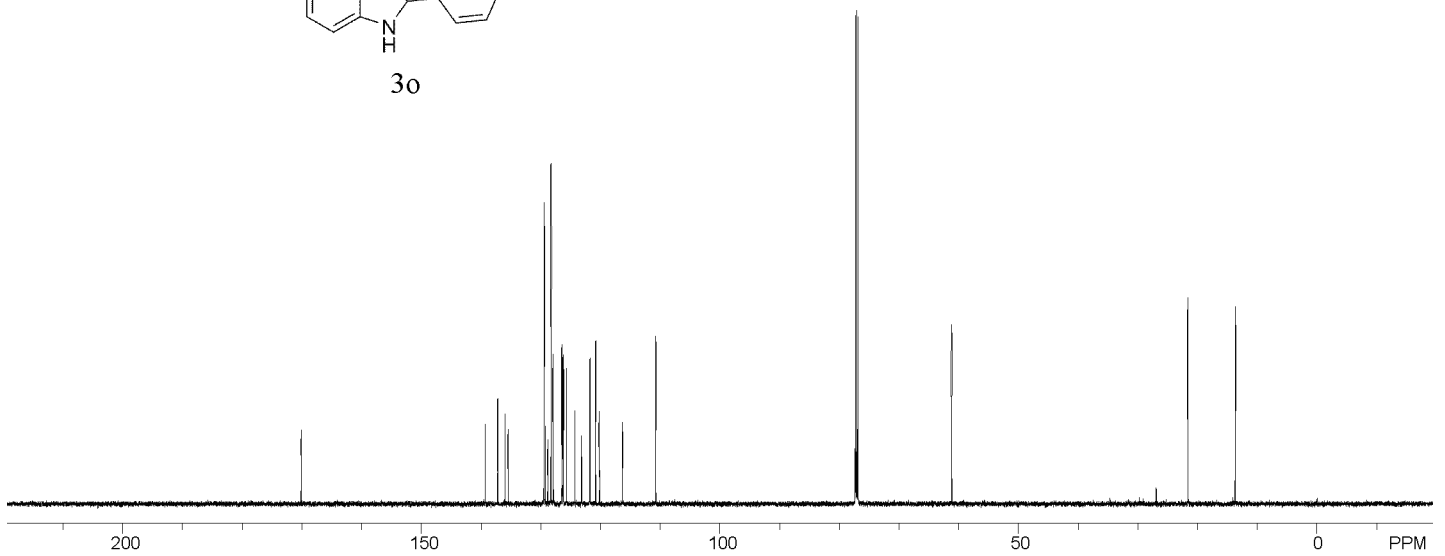

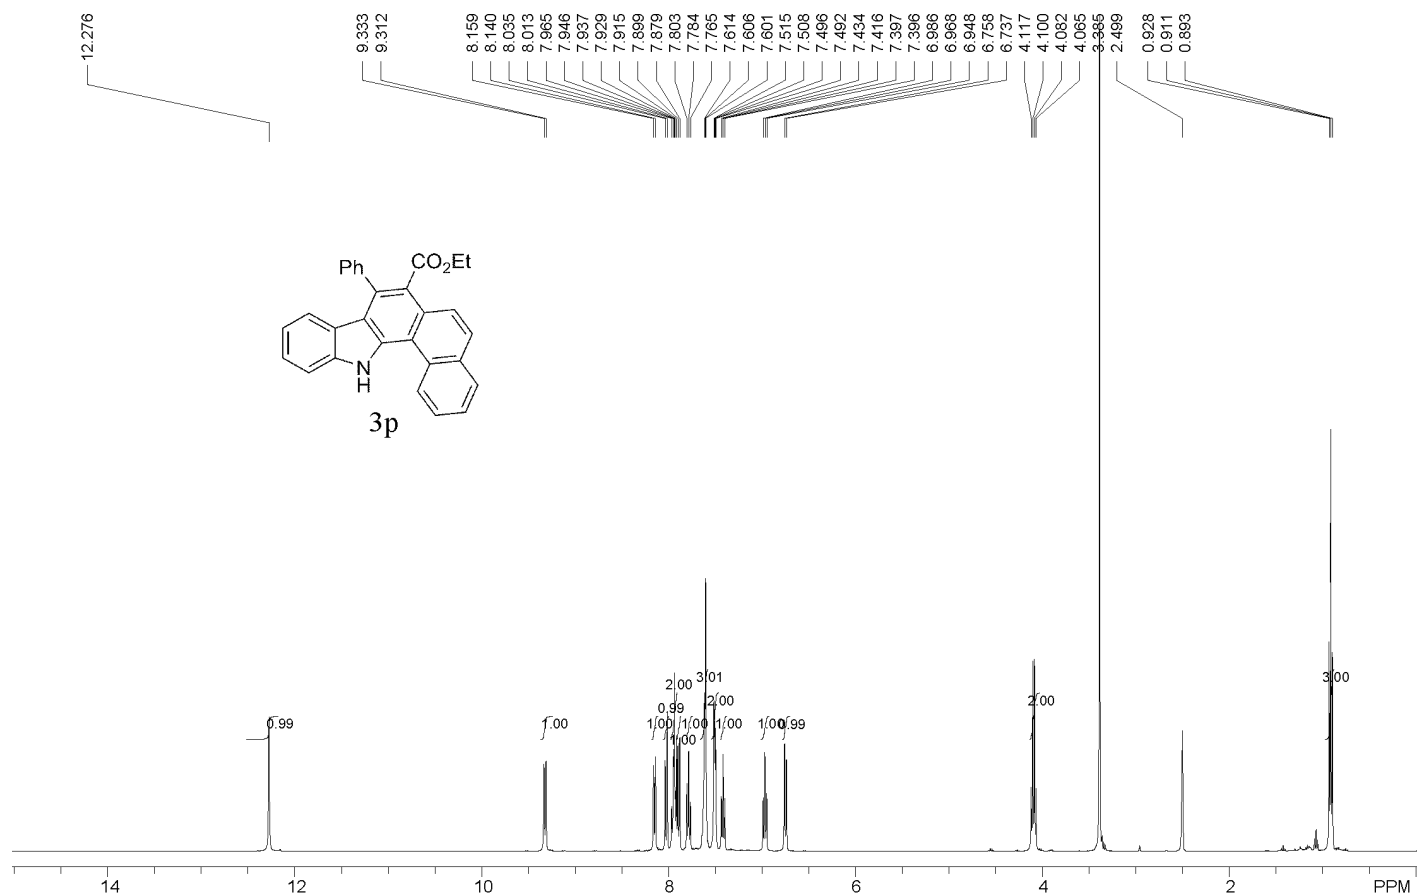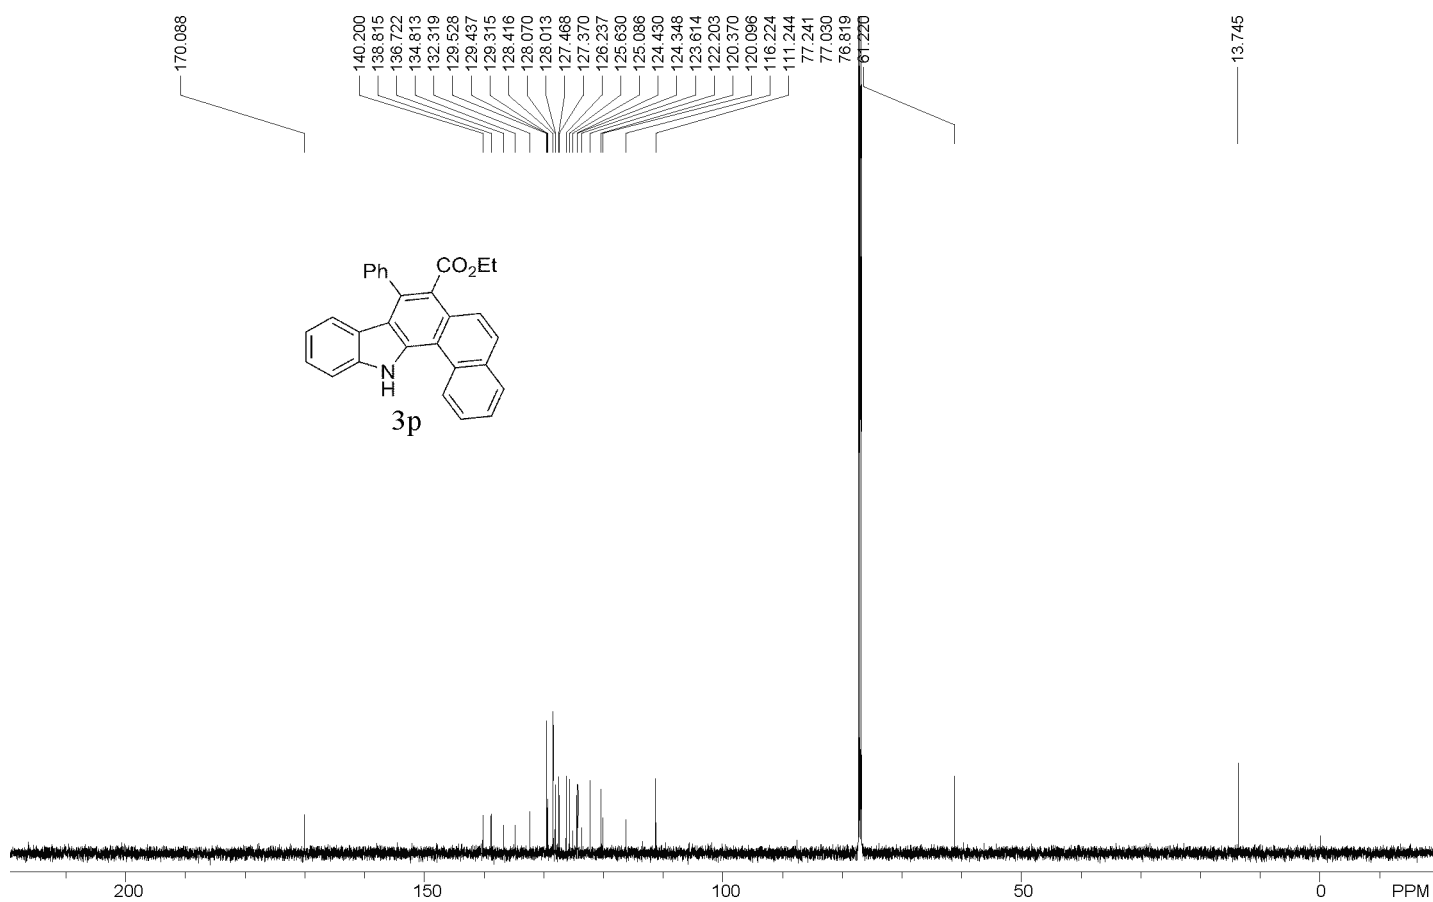

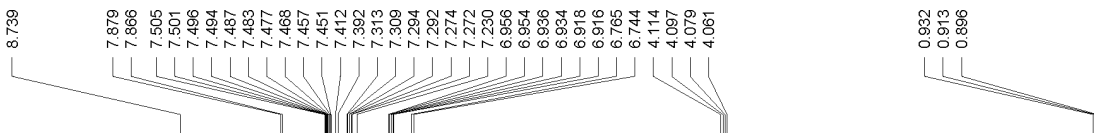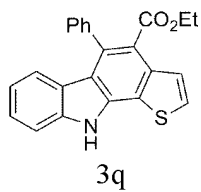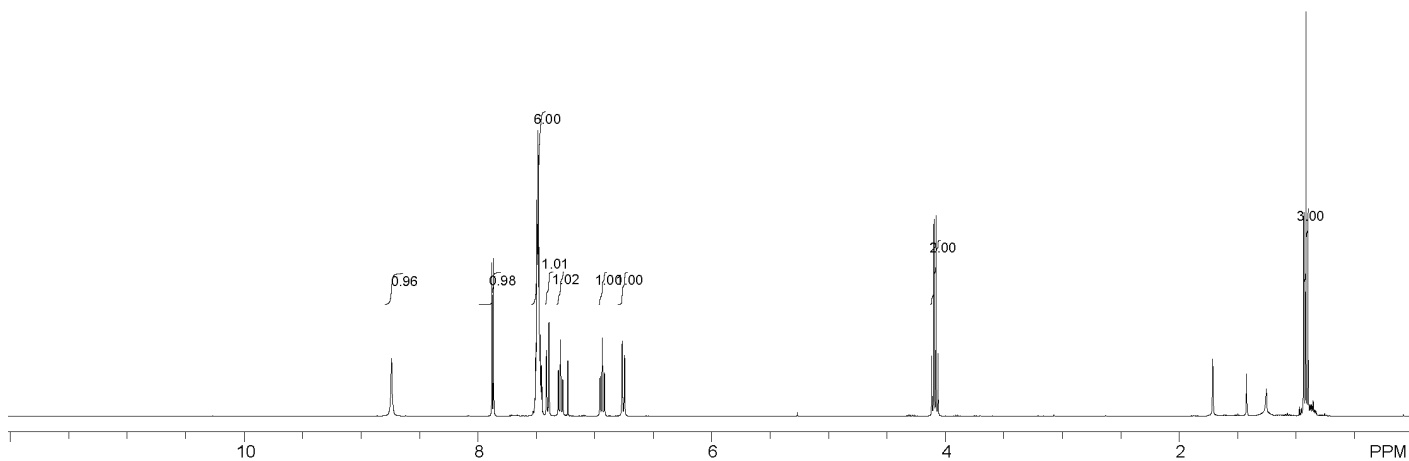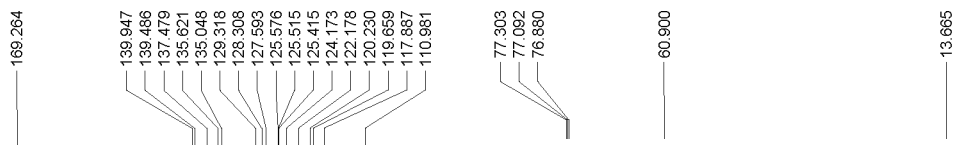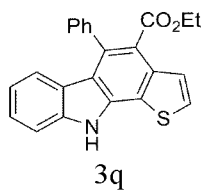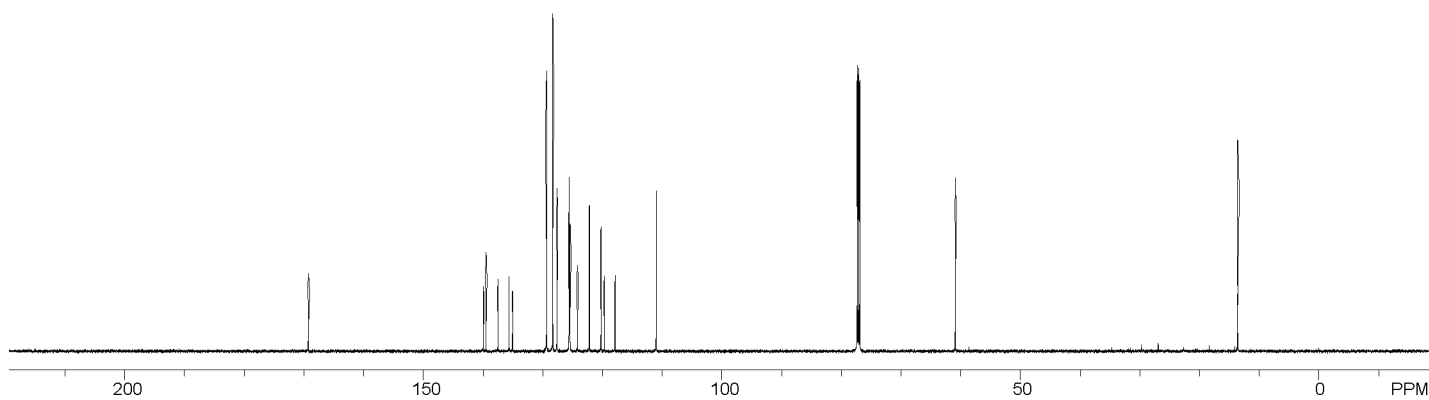

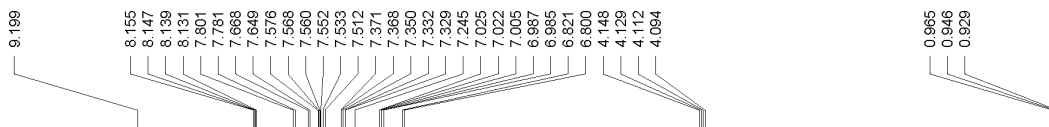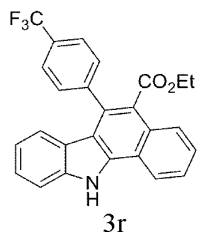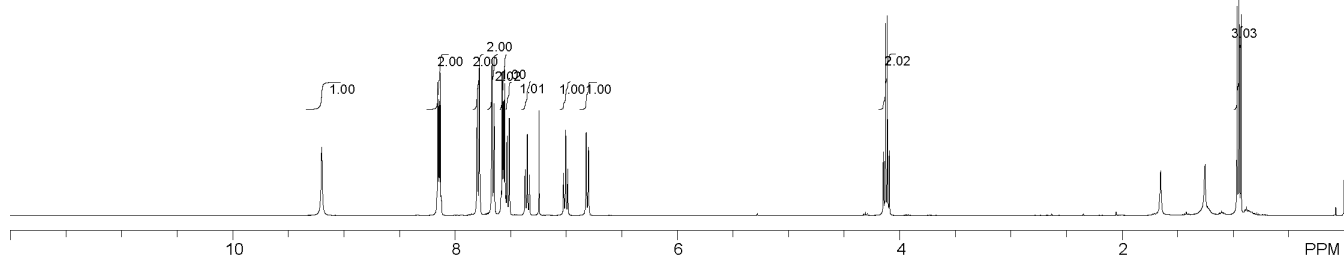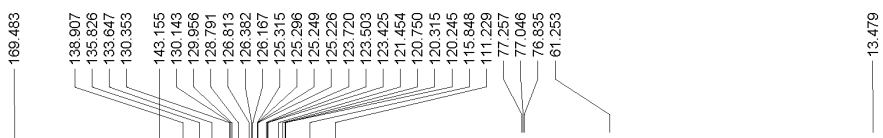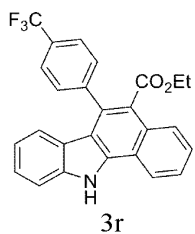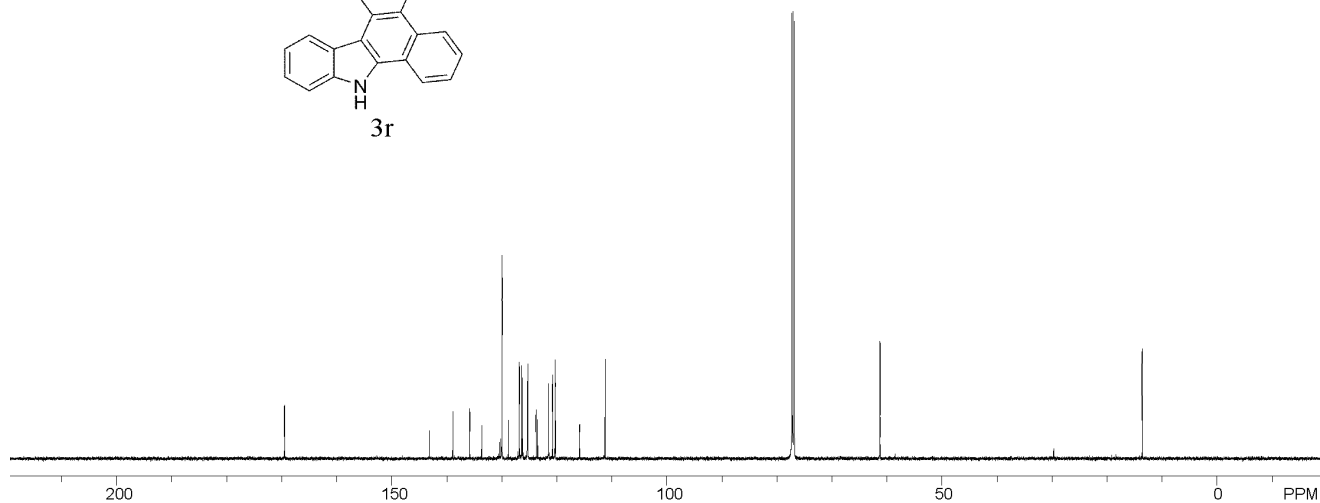

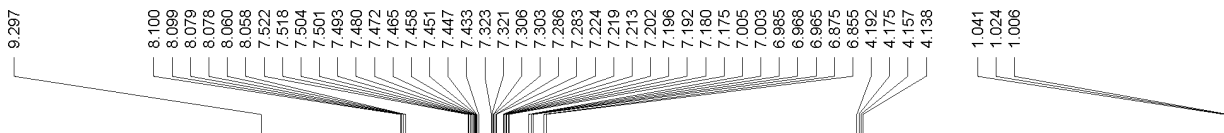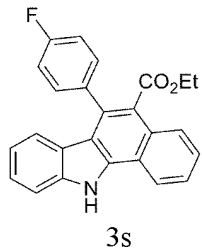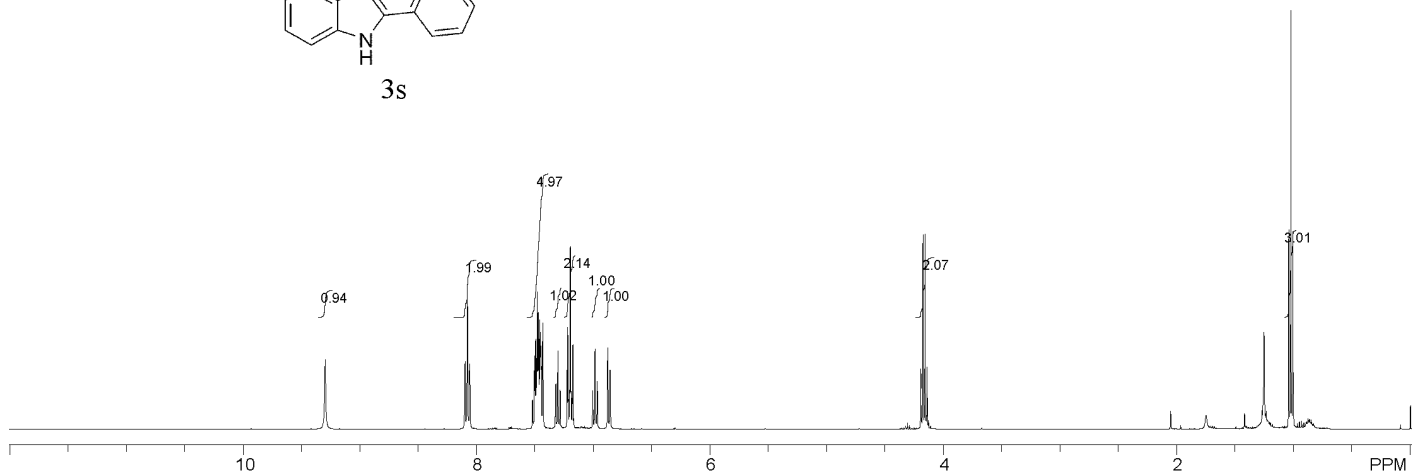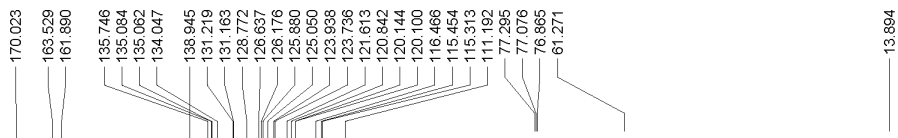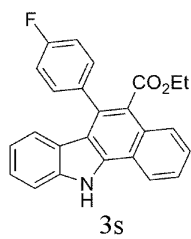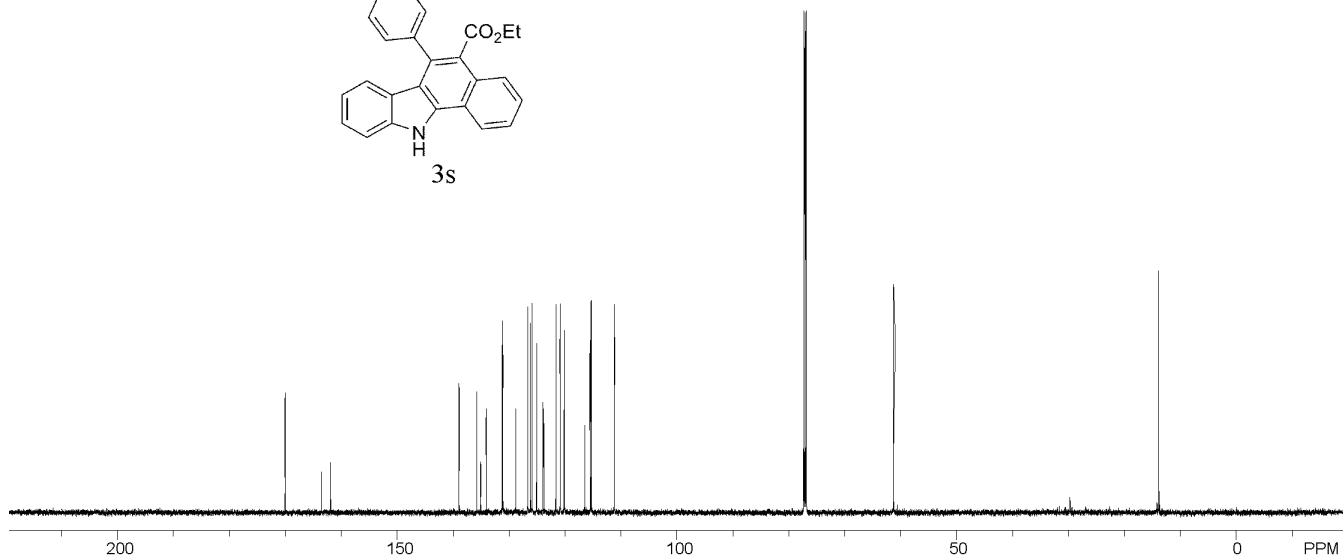

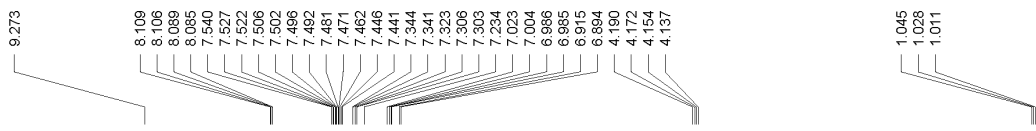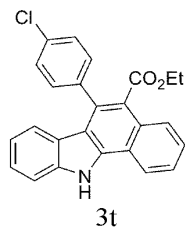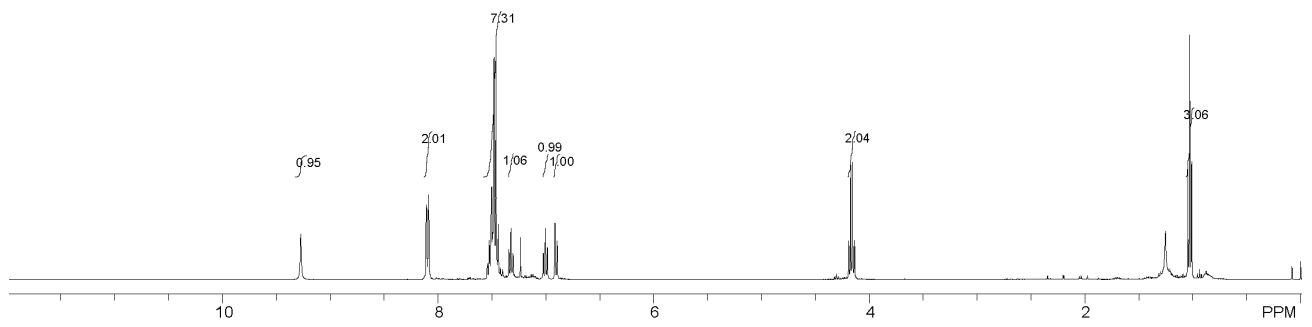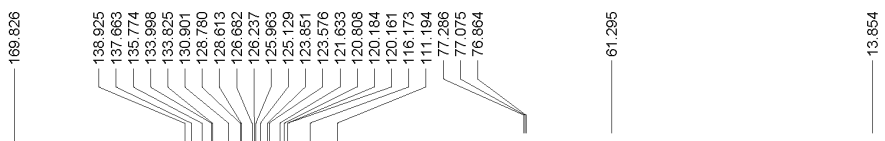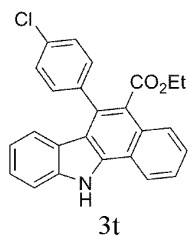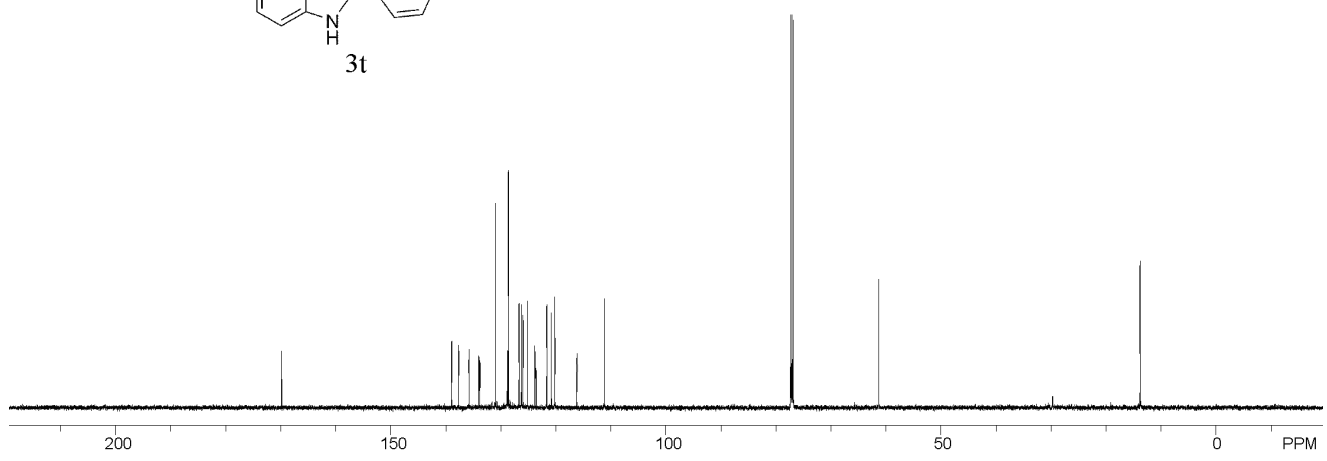



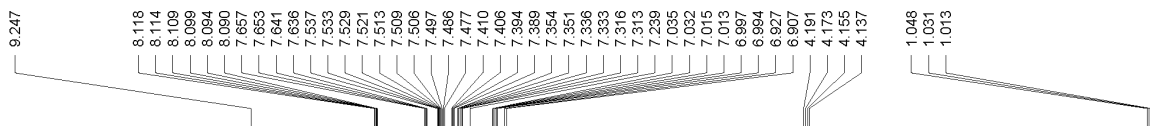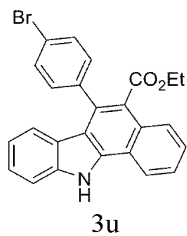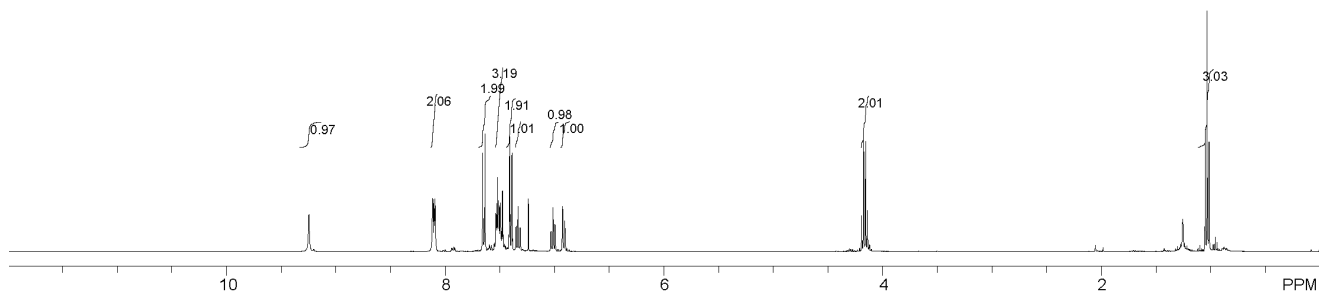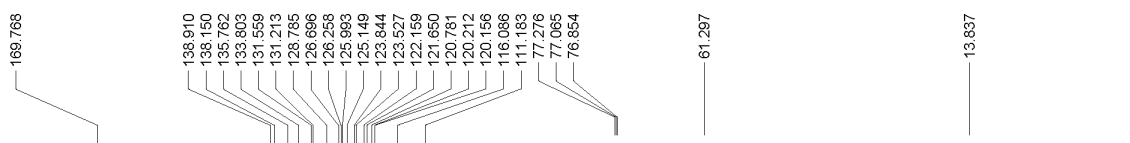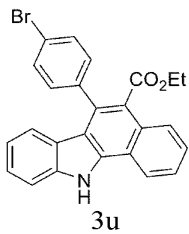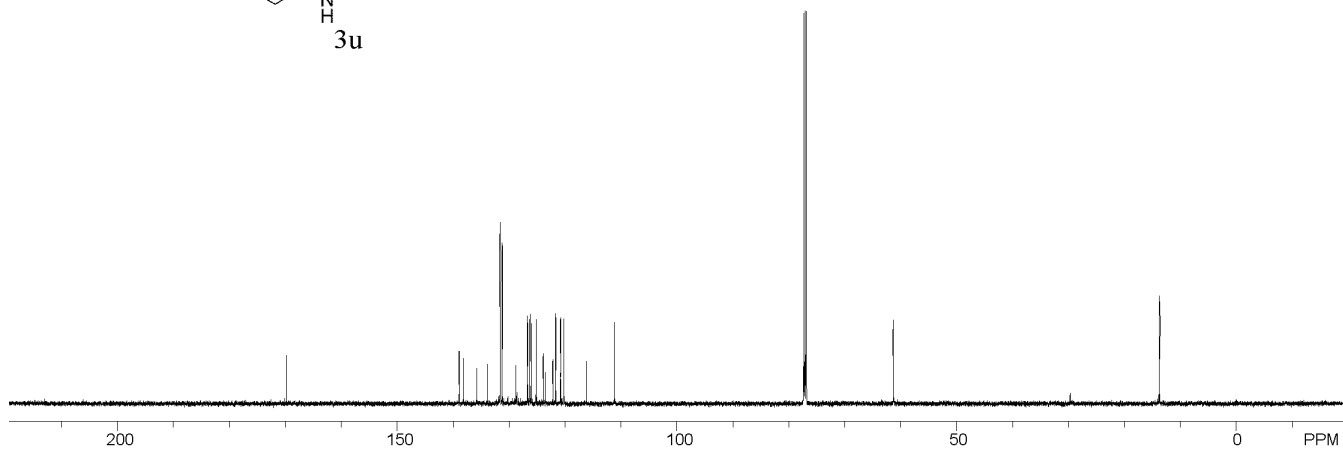

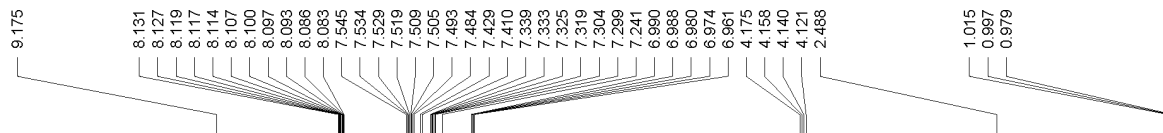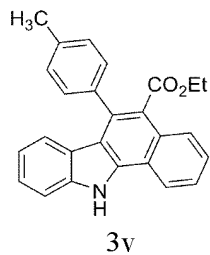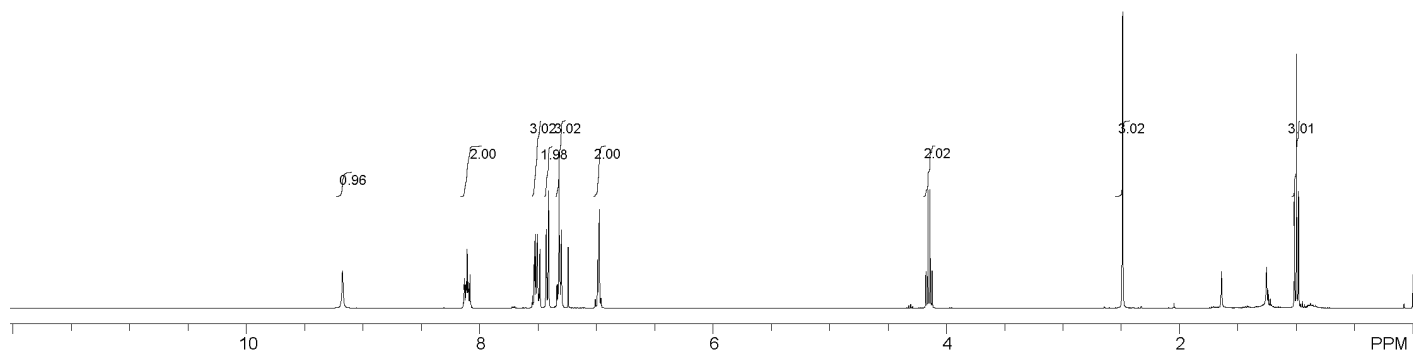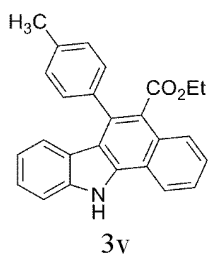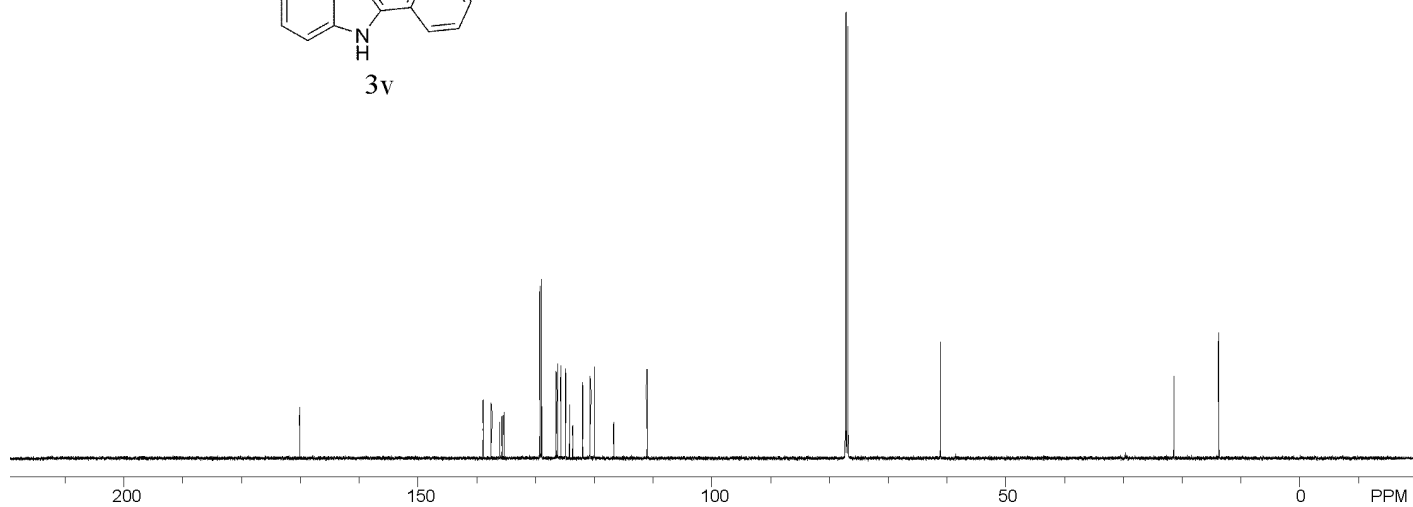

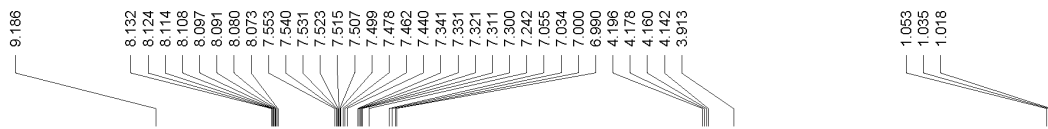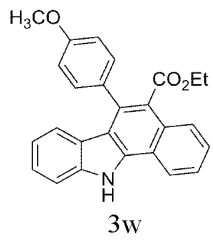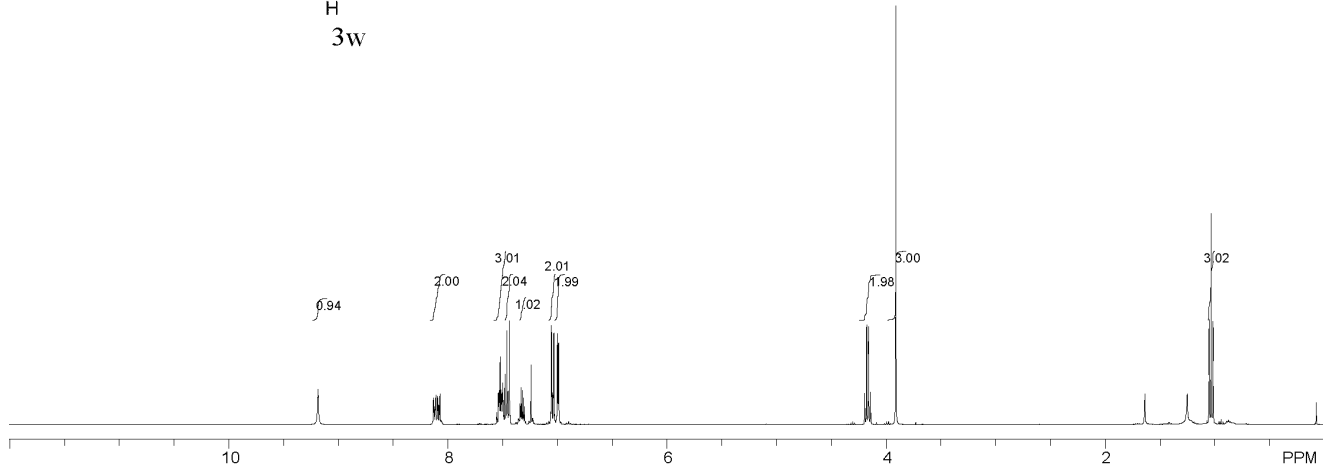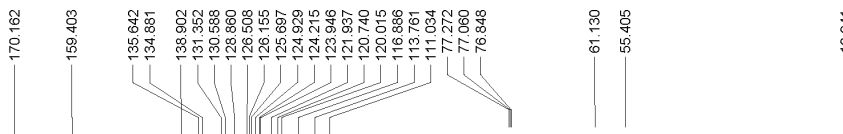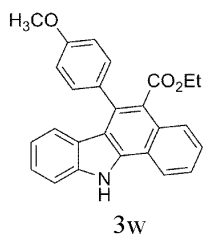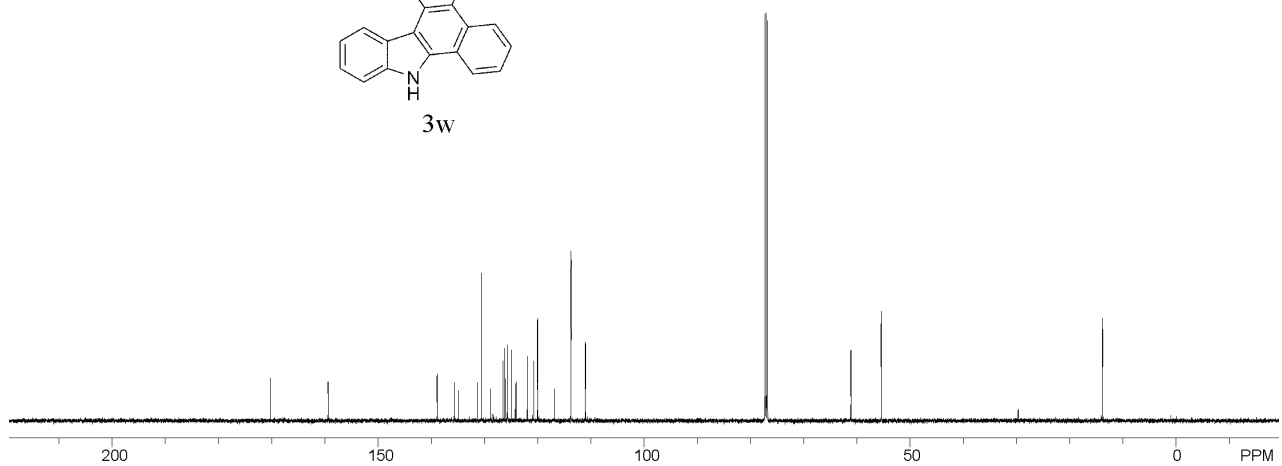

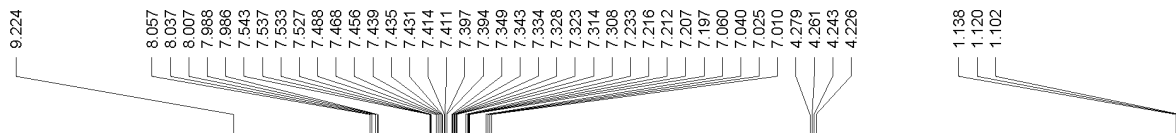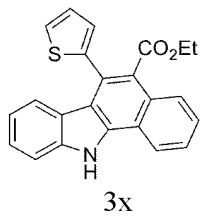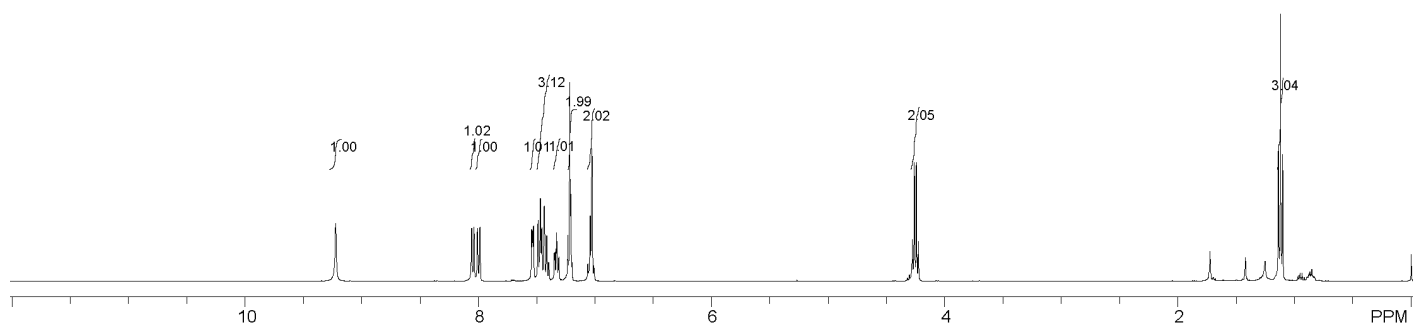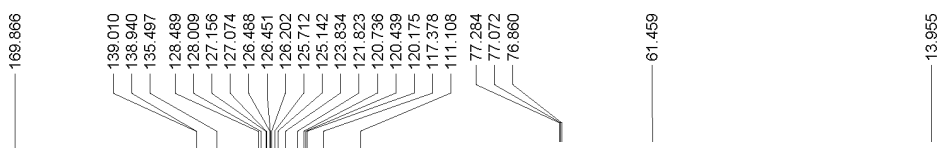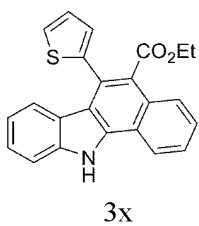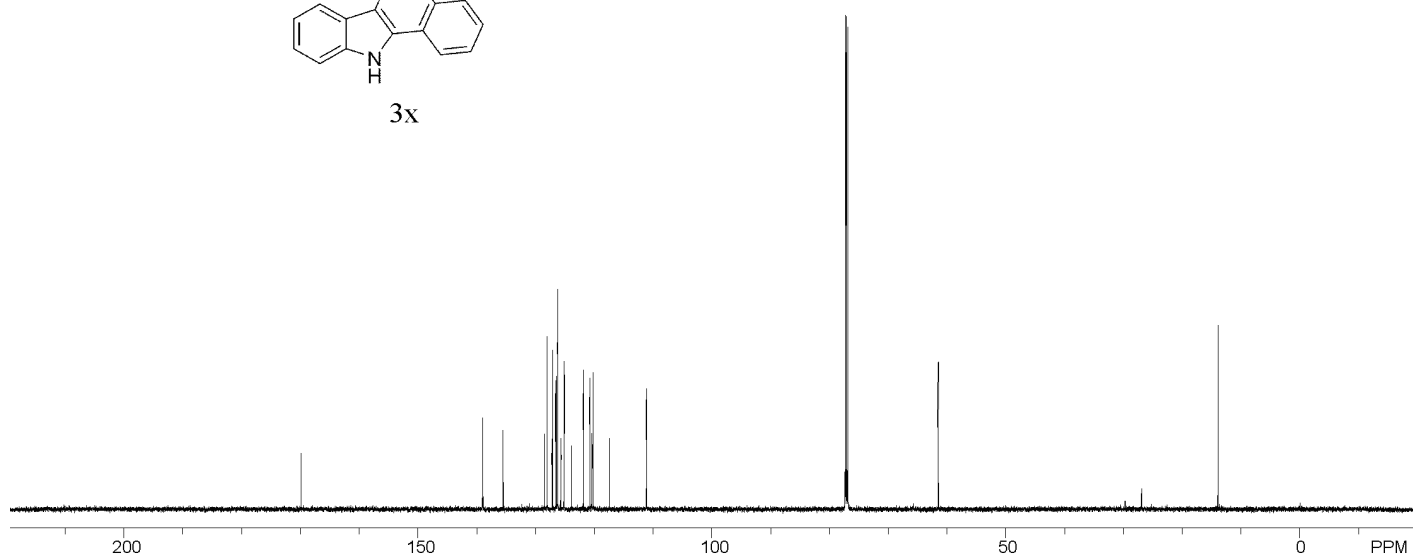

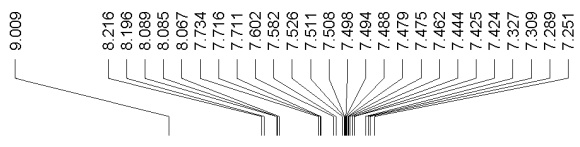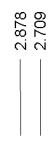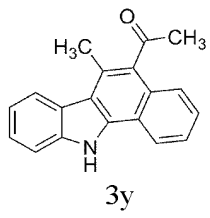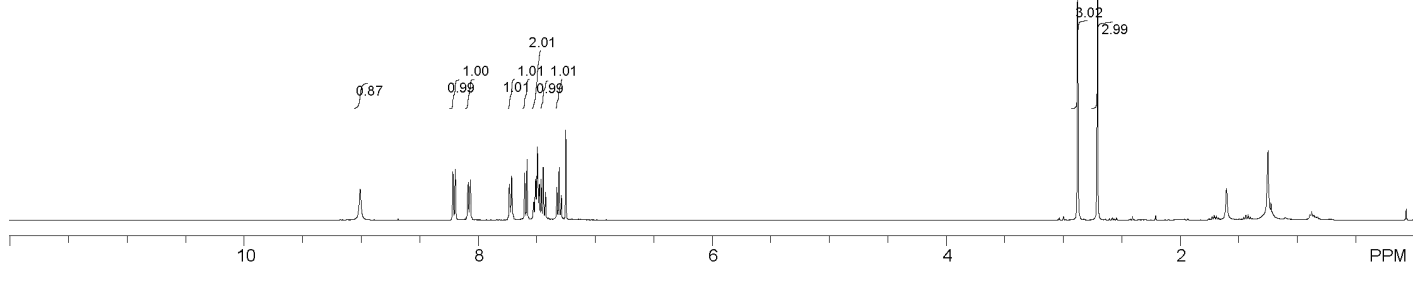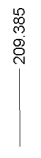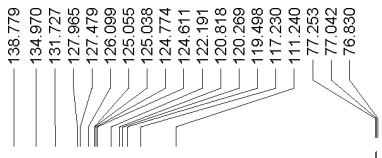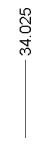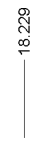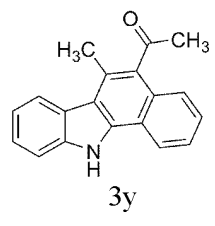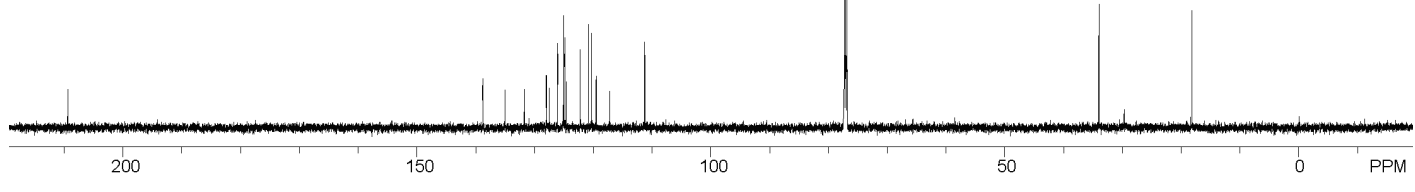

# V. Copies of $^1\text{H}$ and $^{13}\text{C}$ NMR spectra of 5a-5h

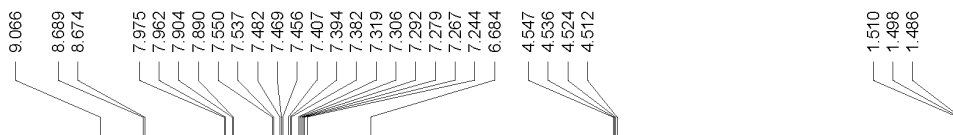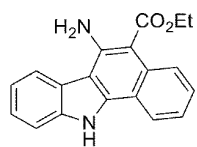

5a

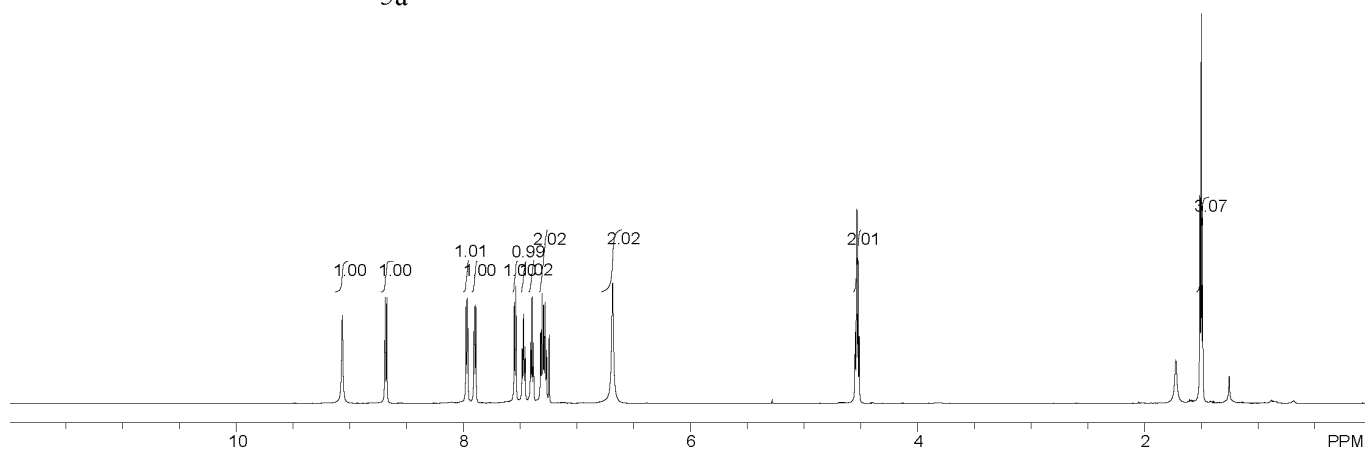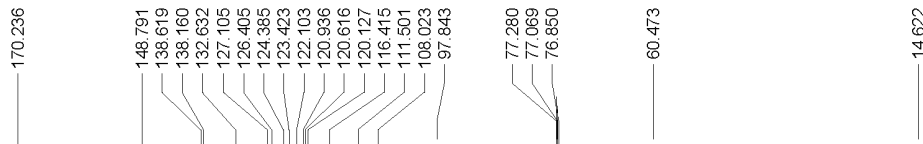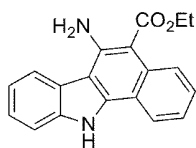

5a

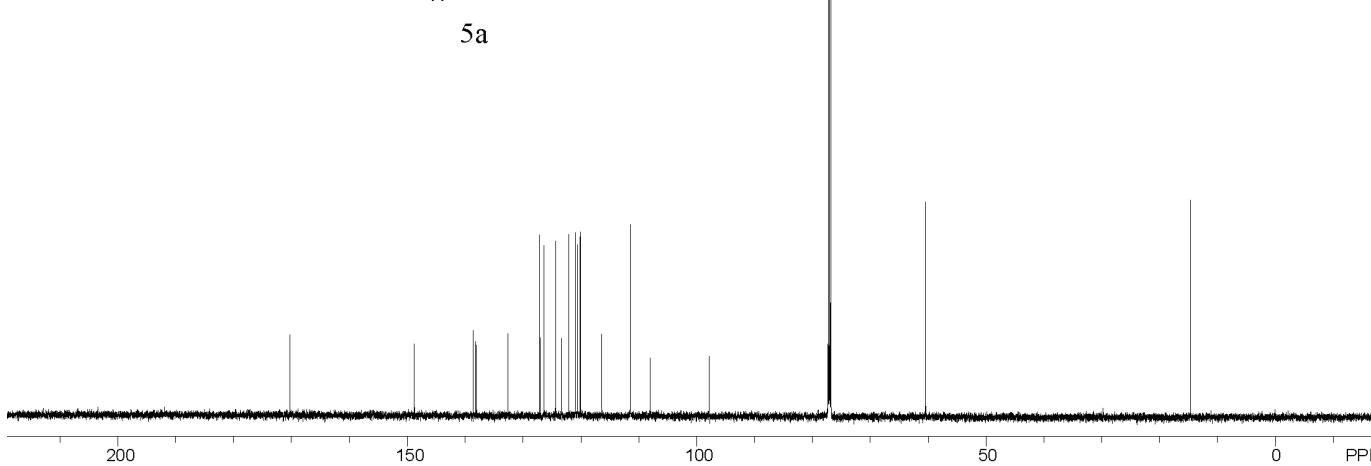

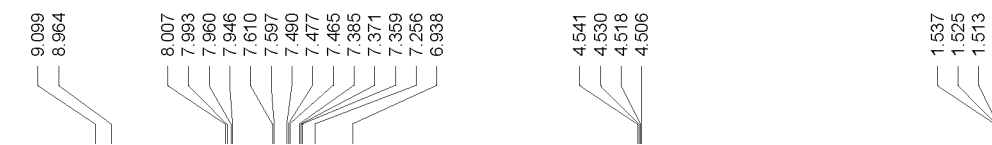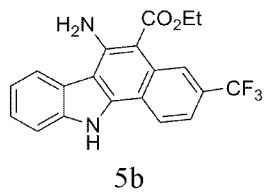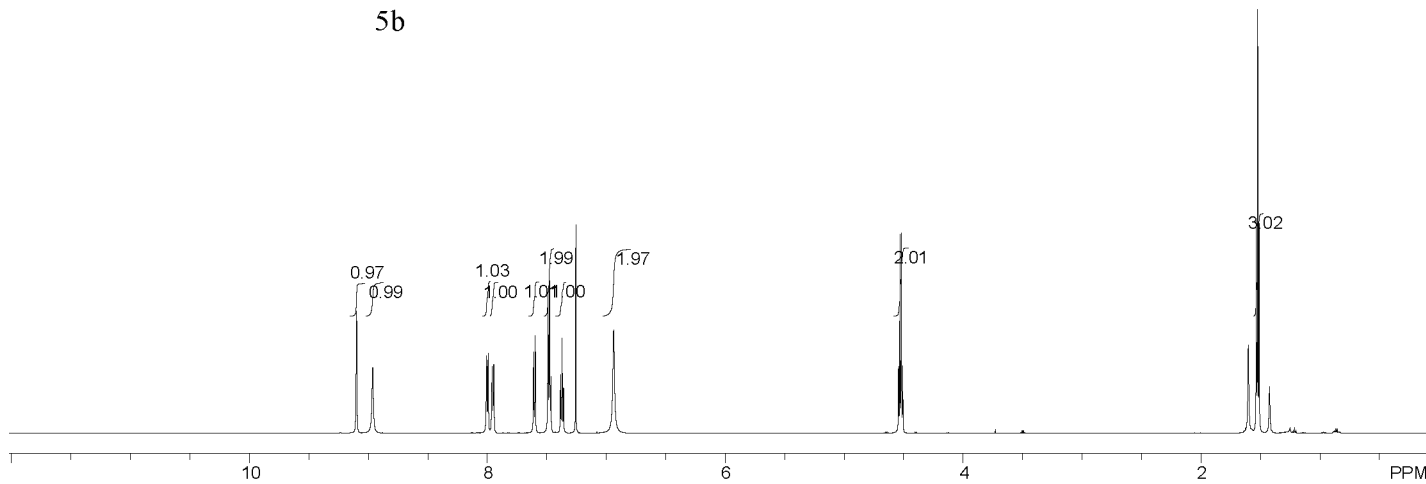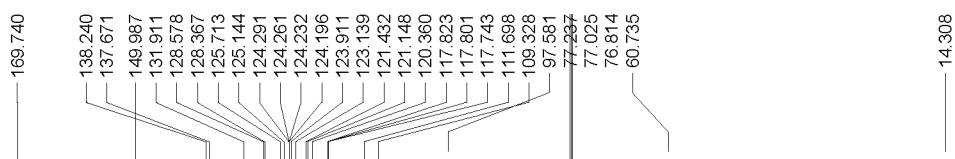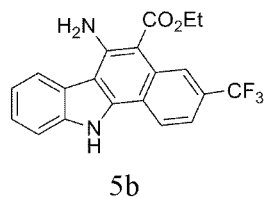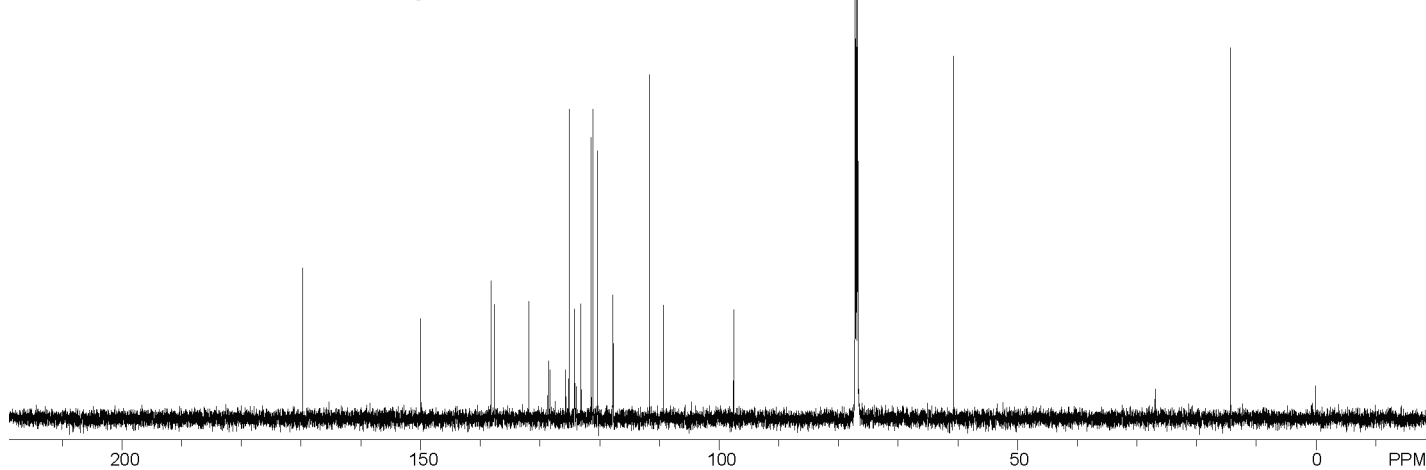

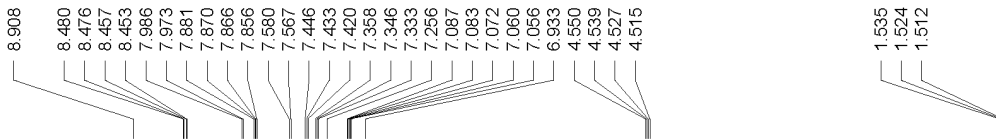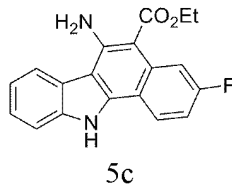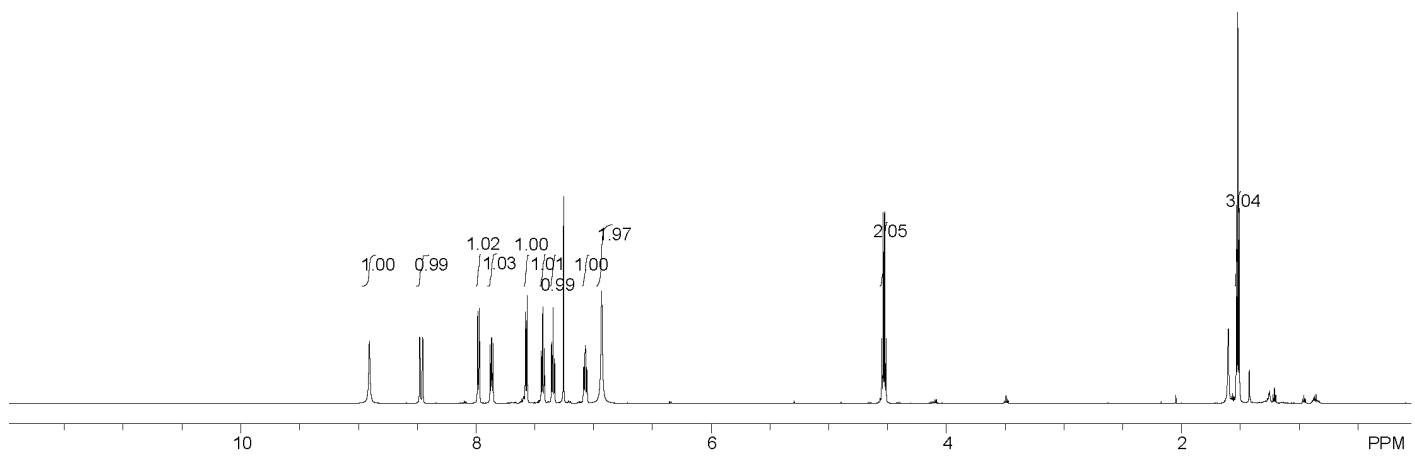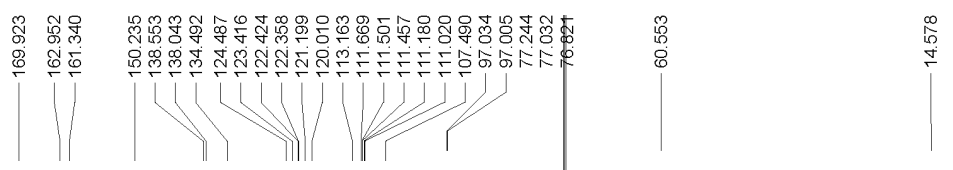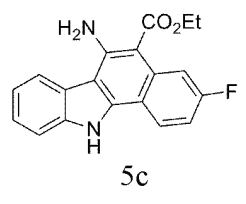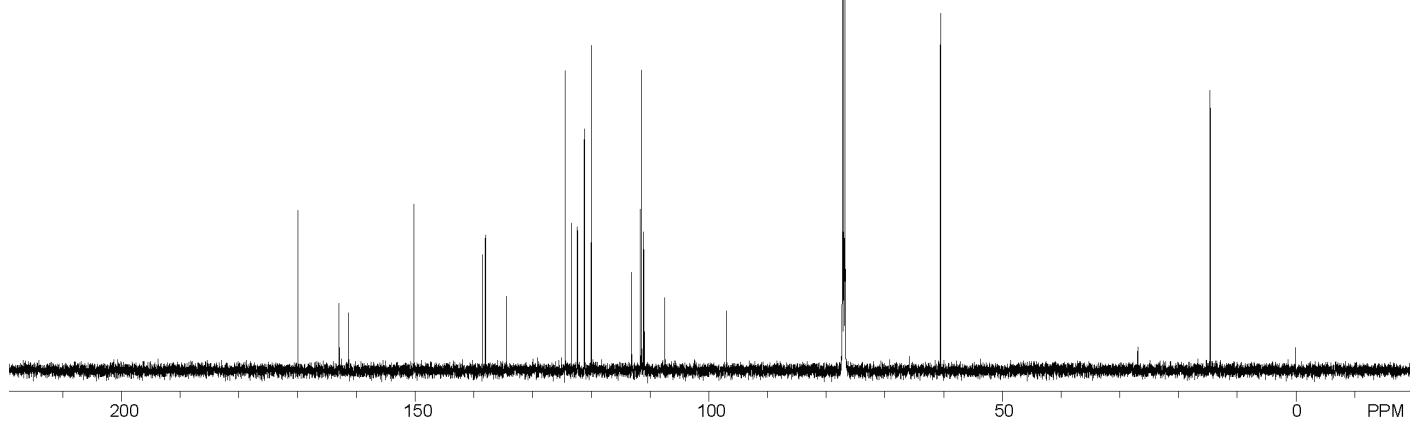



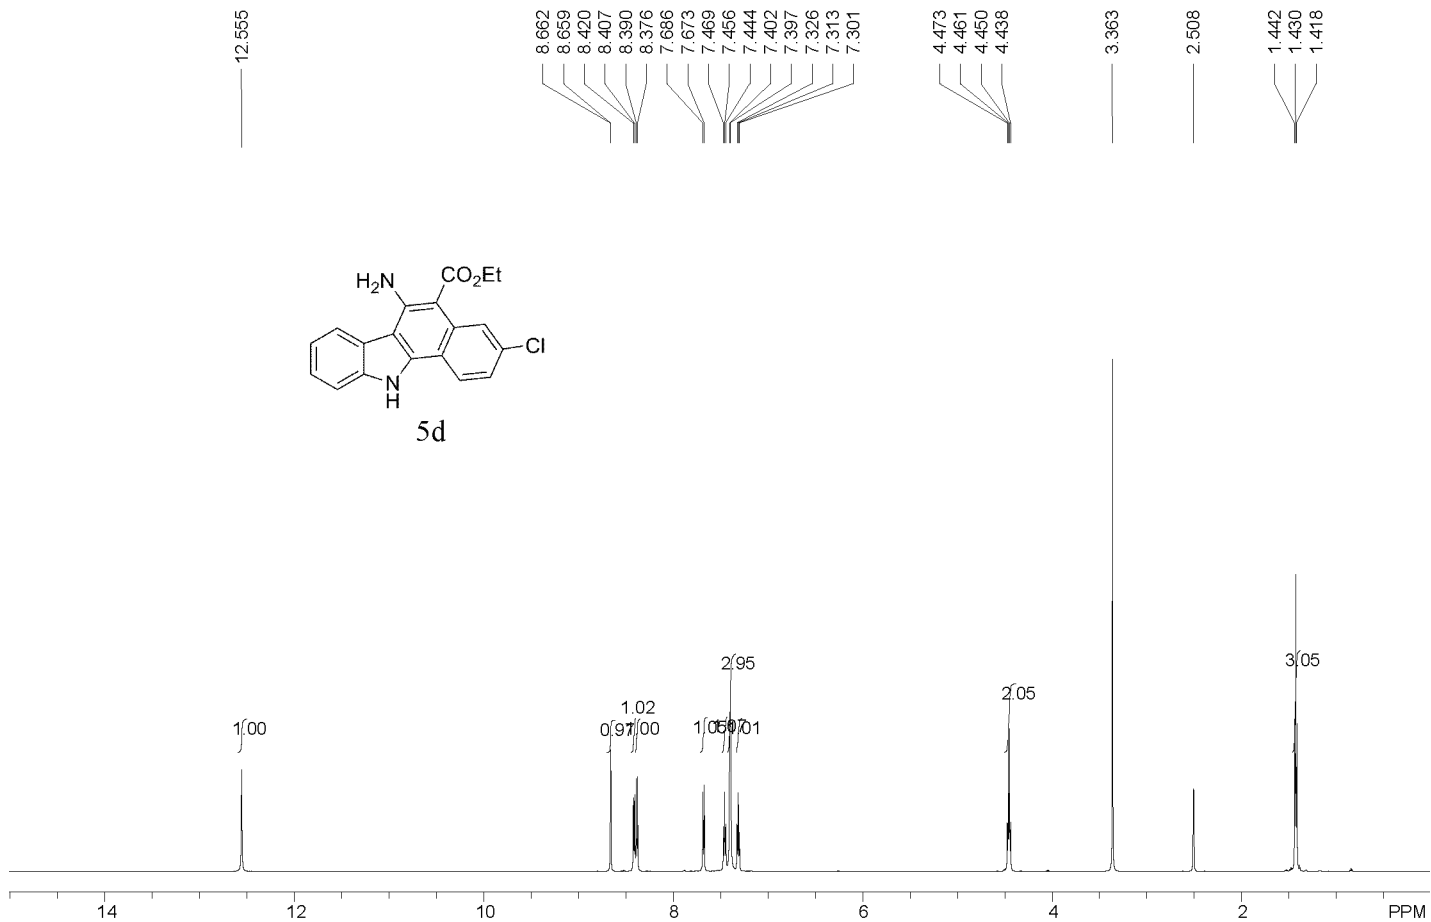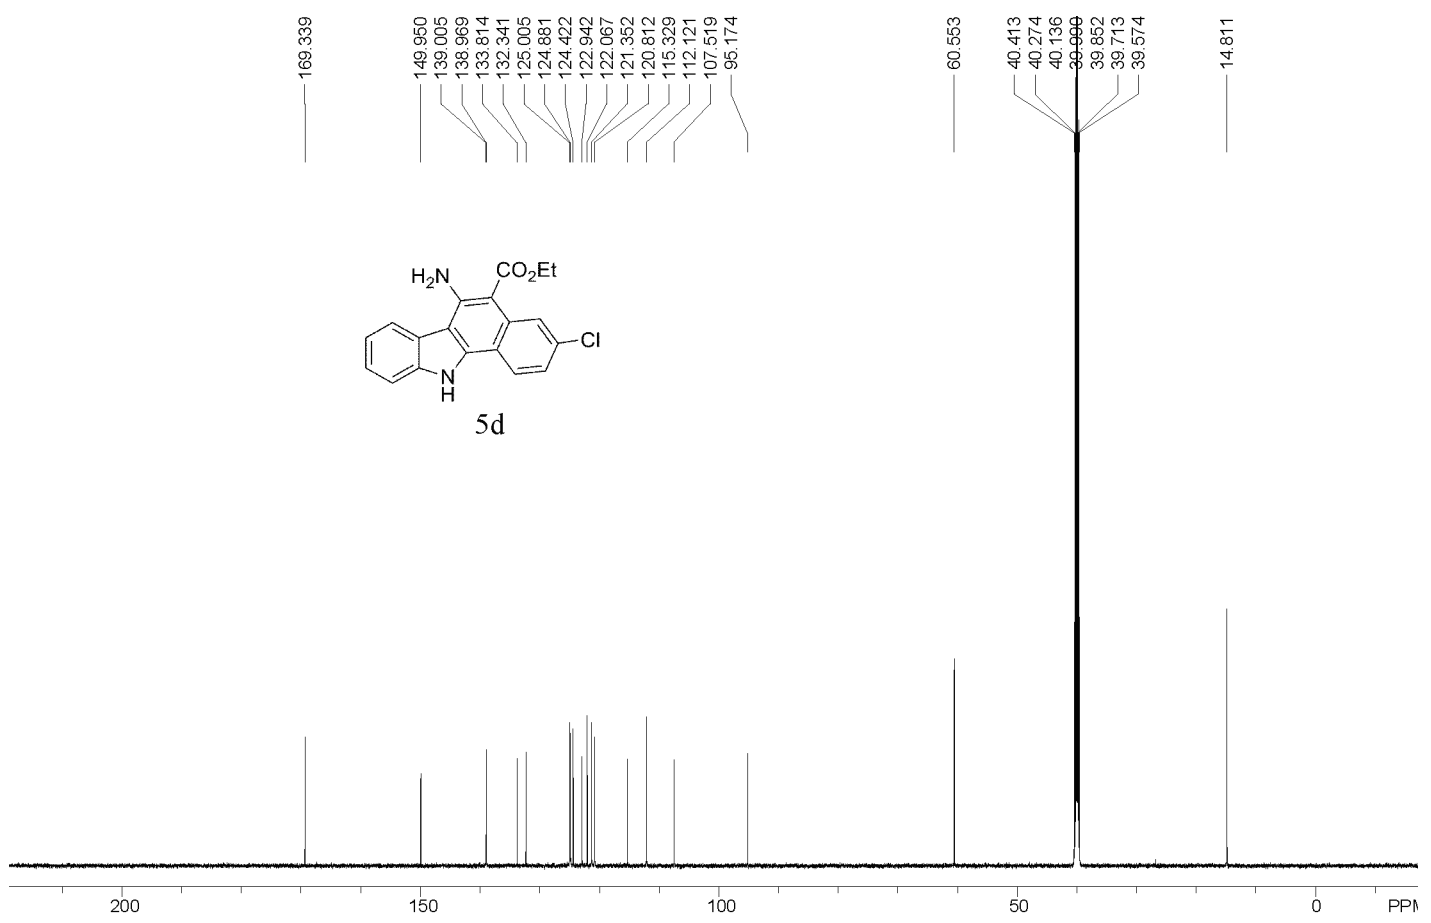

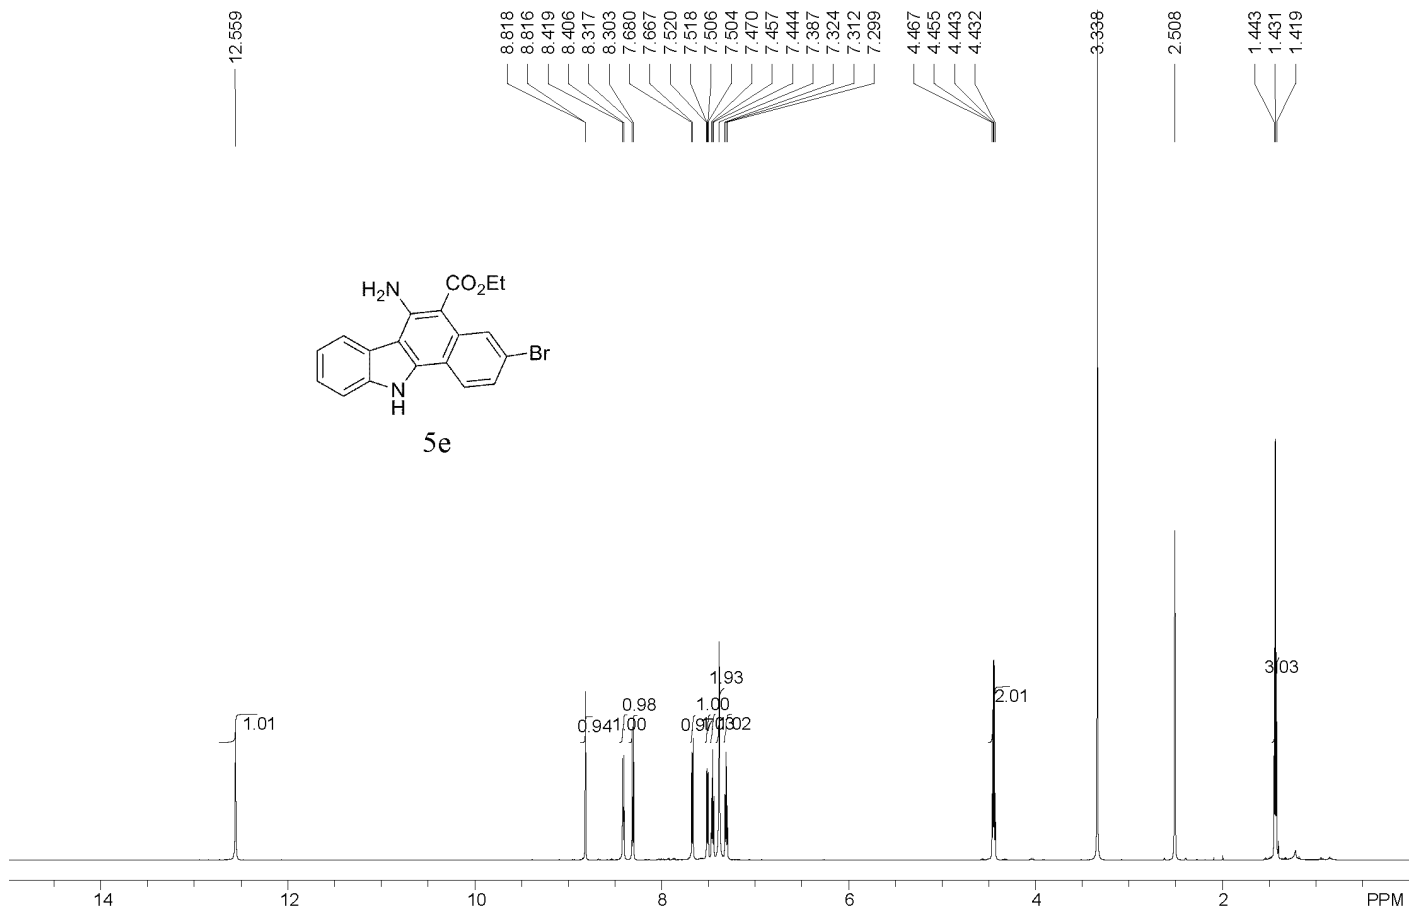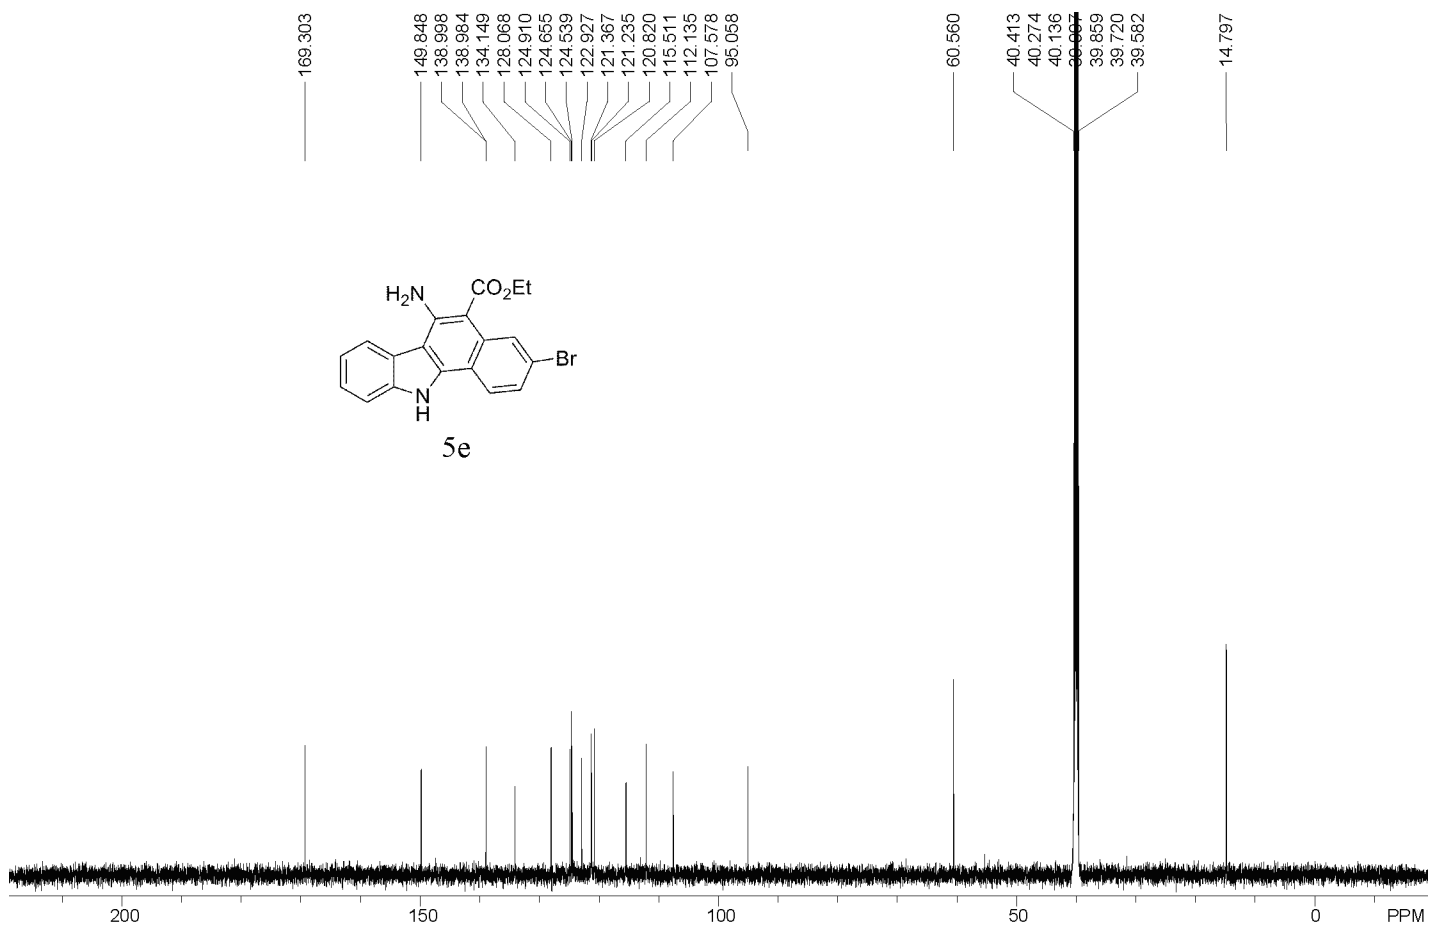

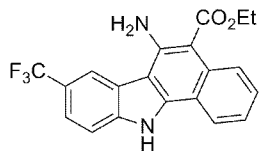

5f

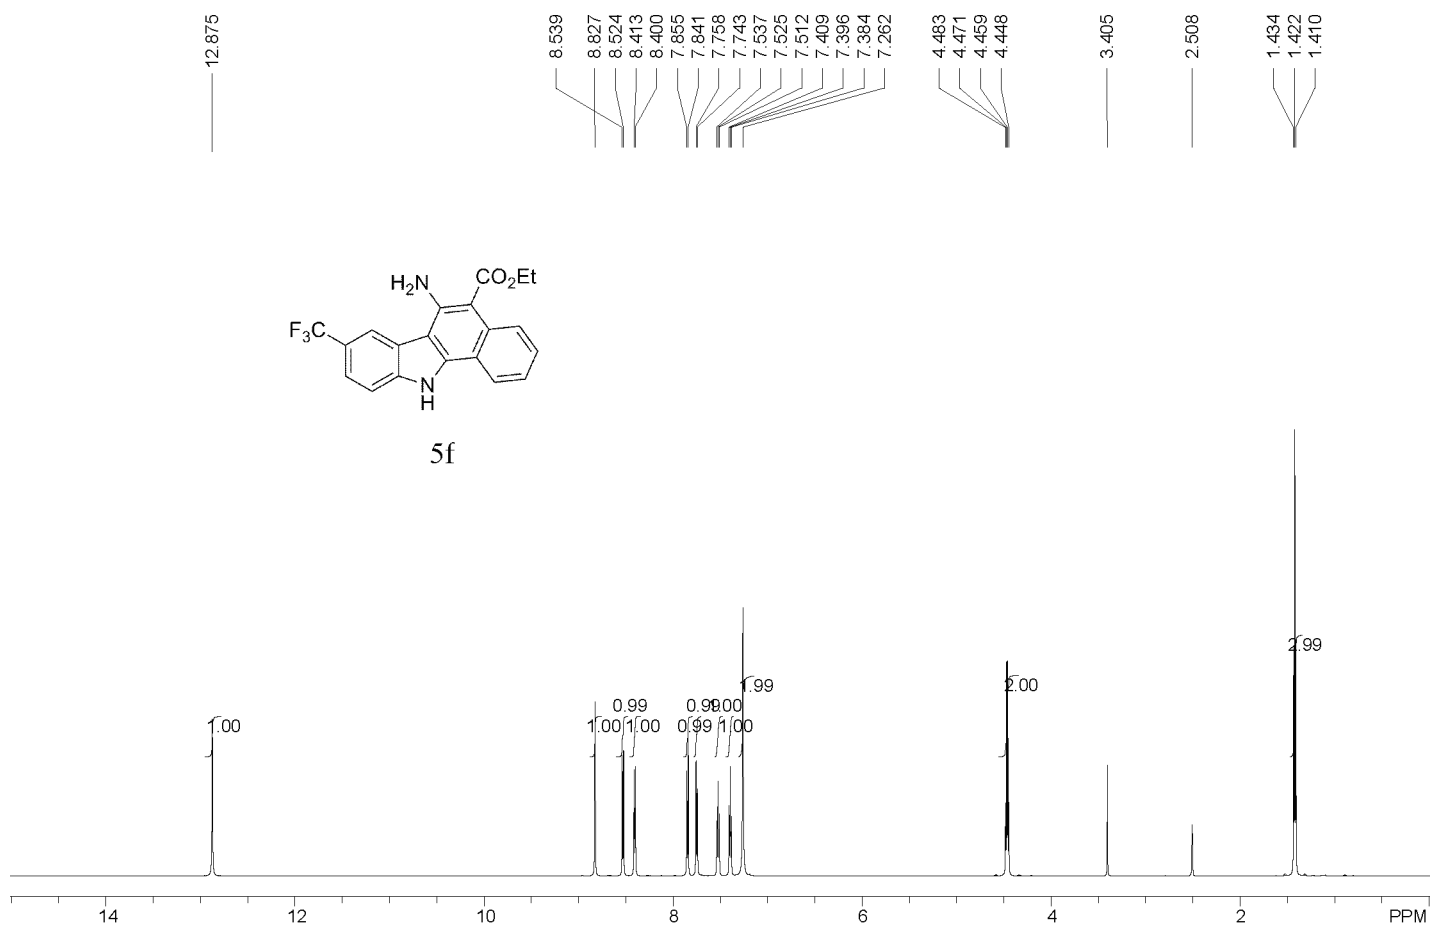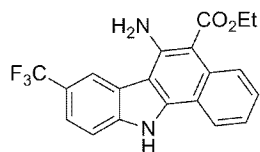

5f

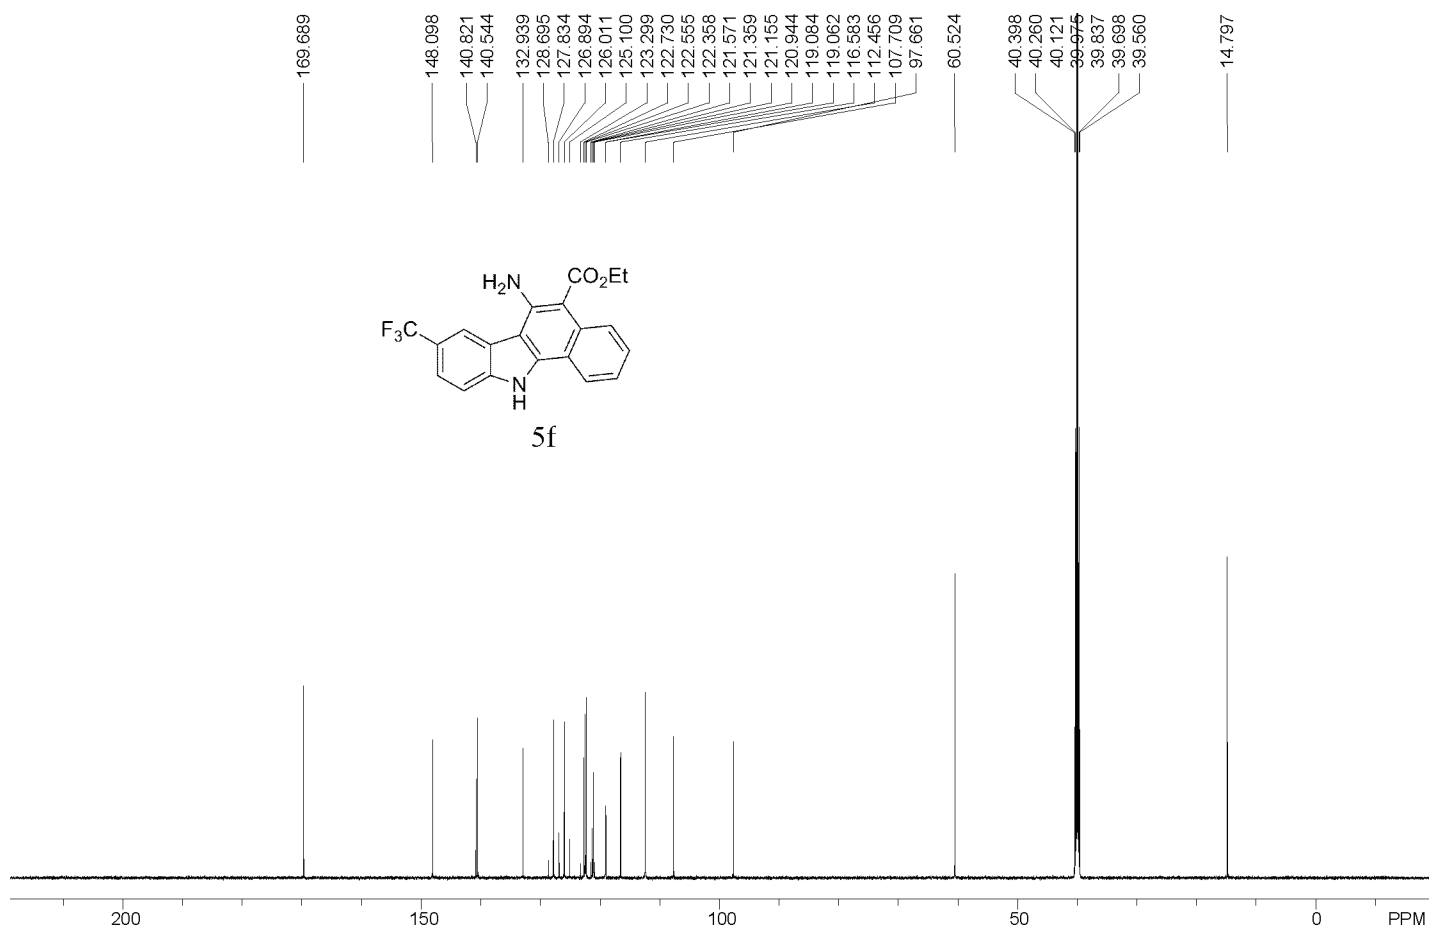

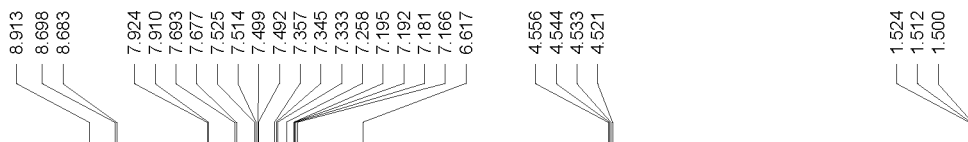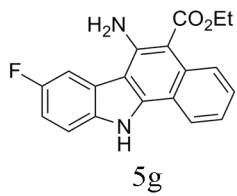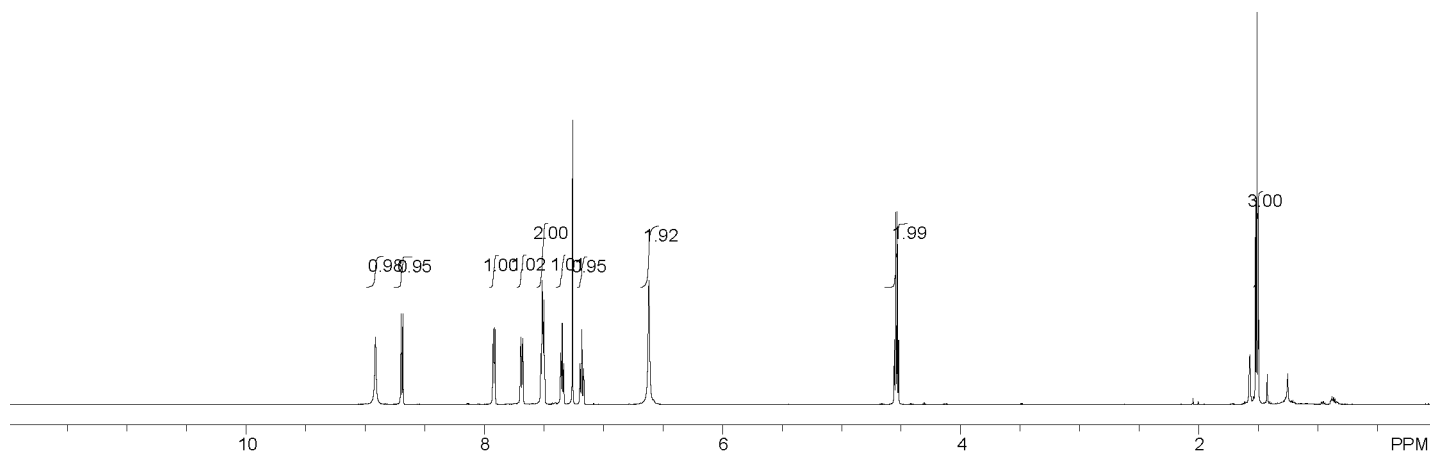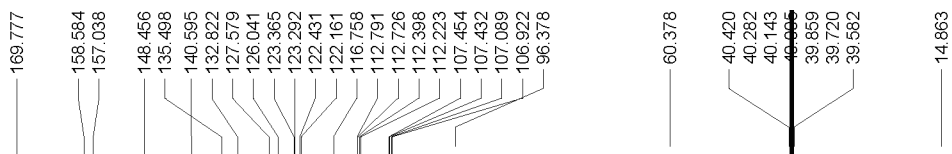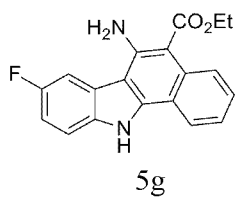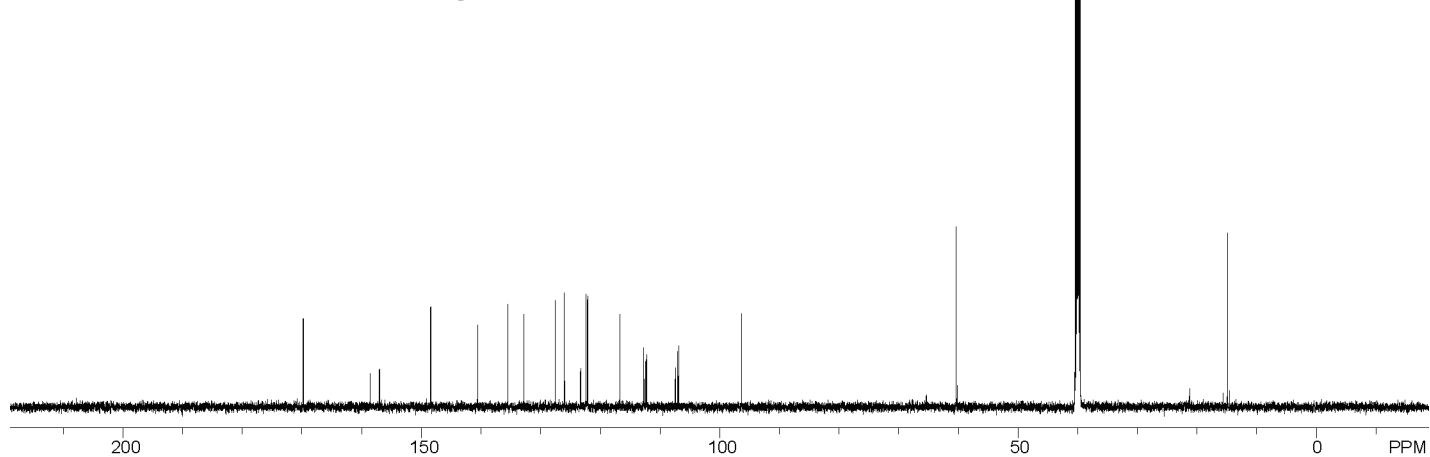

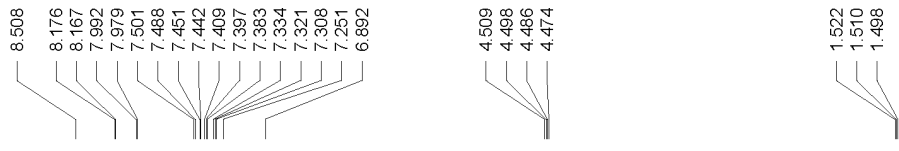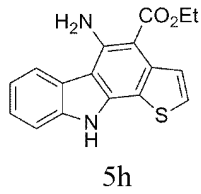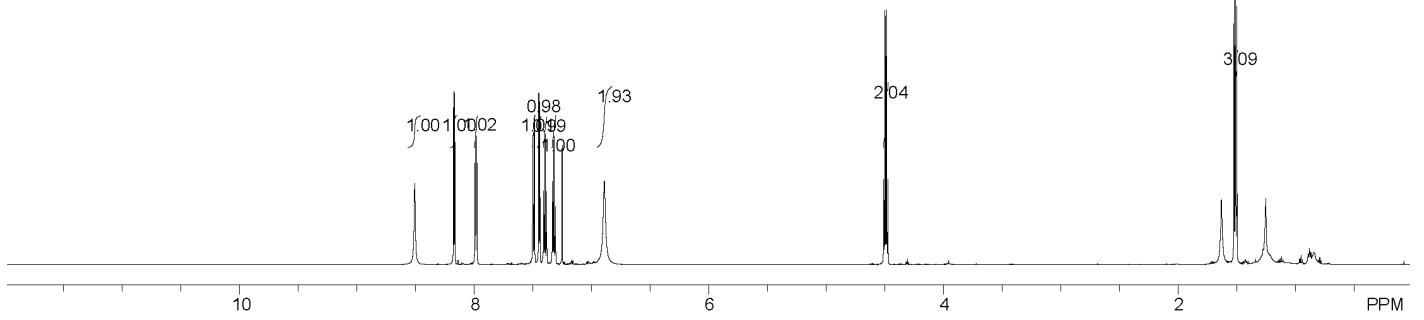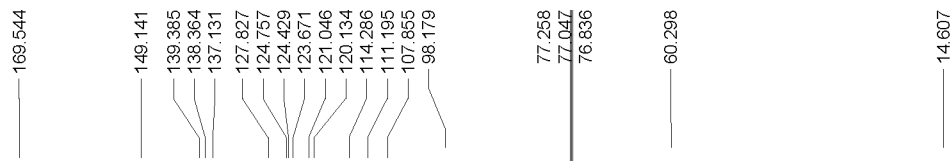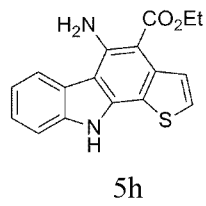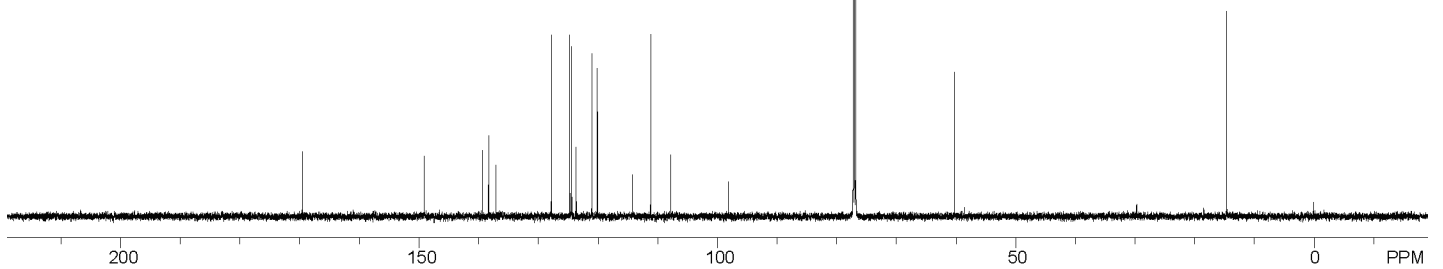

# VI. Copies of $^1\text{H}$ and $^{13}\text{C}$ NMR spectra of 5i, 7 and 8

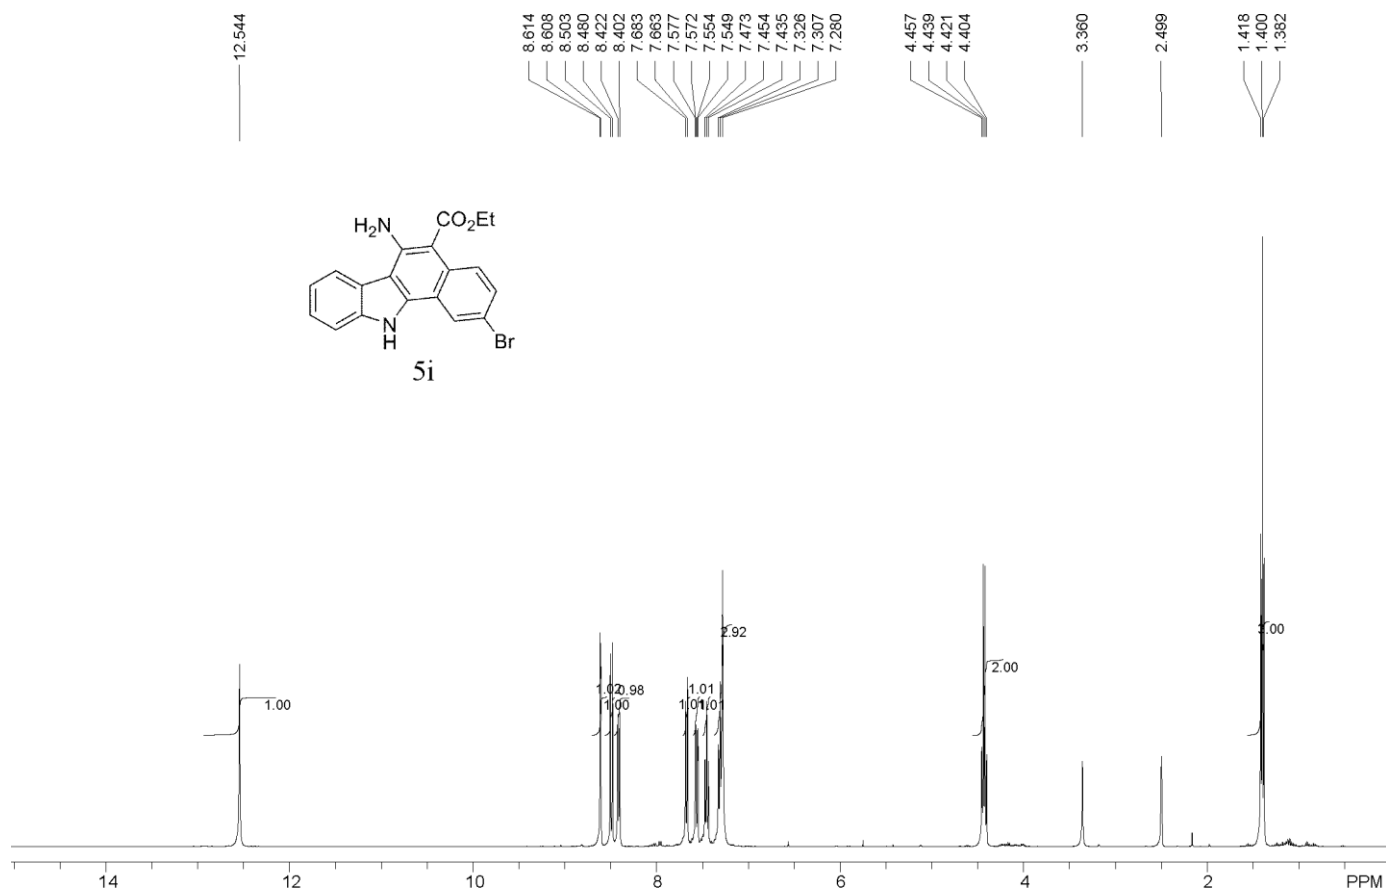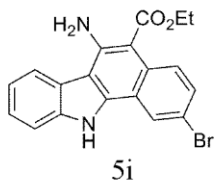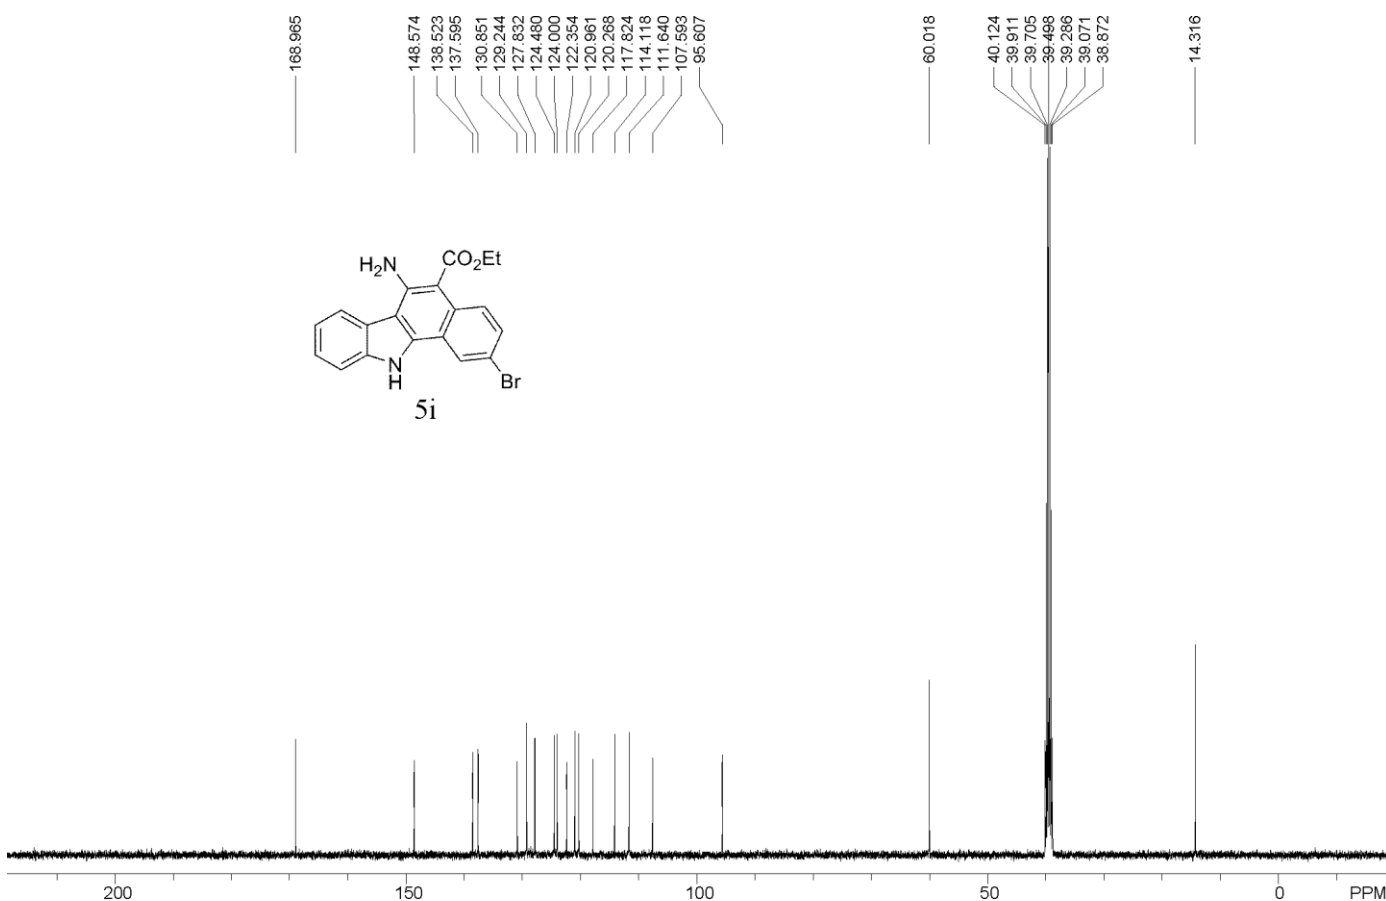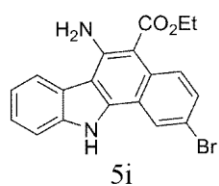

12.609

9.022  
9.006  
8.977  
8.844  
8.256  
8.243  
7.750  
7.734  
7.685  
7.671  
7.497  
7.485  
7.472  
7.314  
7.301  
7.289

4.434  
4.422  
4.410  
4.399

2.507

1.443  
1.431  
1.419

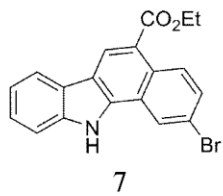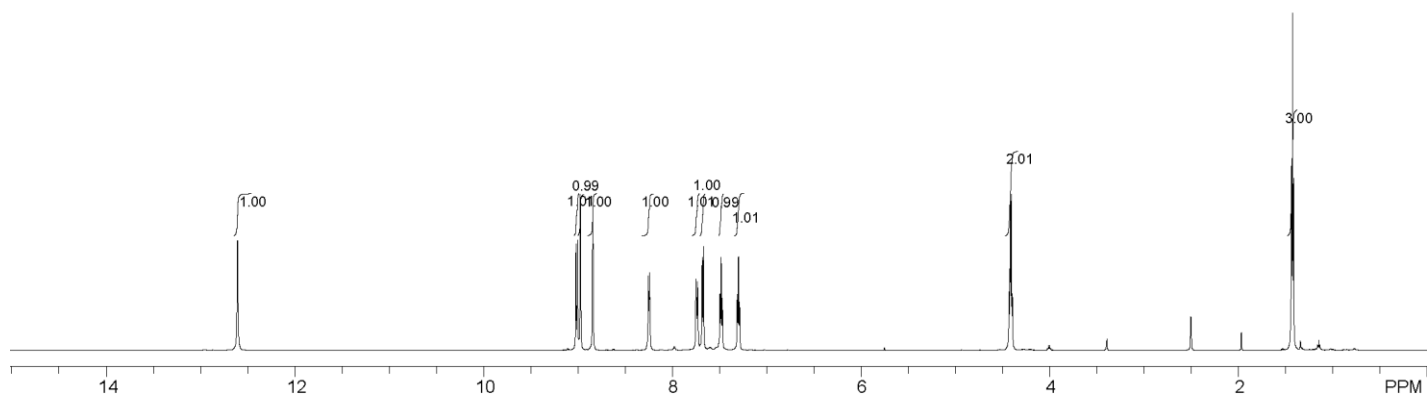

167.329

139.804  
137.668  
129.837  
129.217  
128.824  
128.217  
126.170  
125.060  
123.566  
122.960  
120.763  
120.636  
119.501  
117.618  
117.151  
112.289

60.953

40.415  
40.277  
40.139  
40.002  
39.865  
39.727  
39.587

14.783

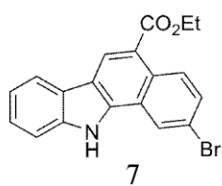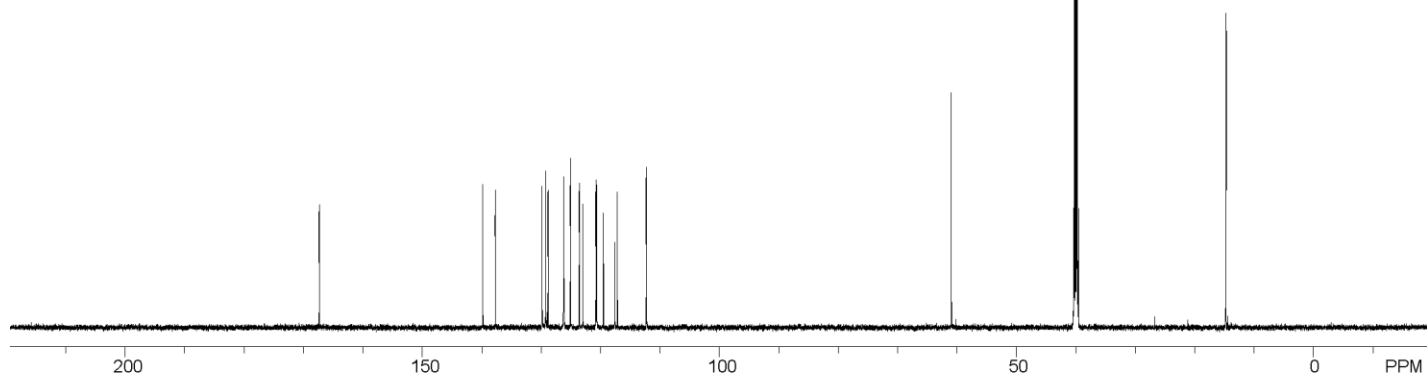

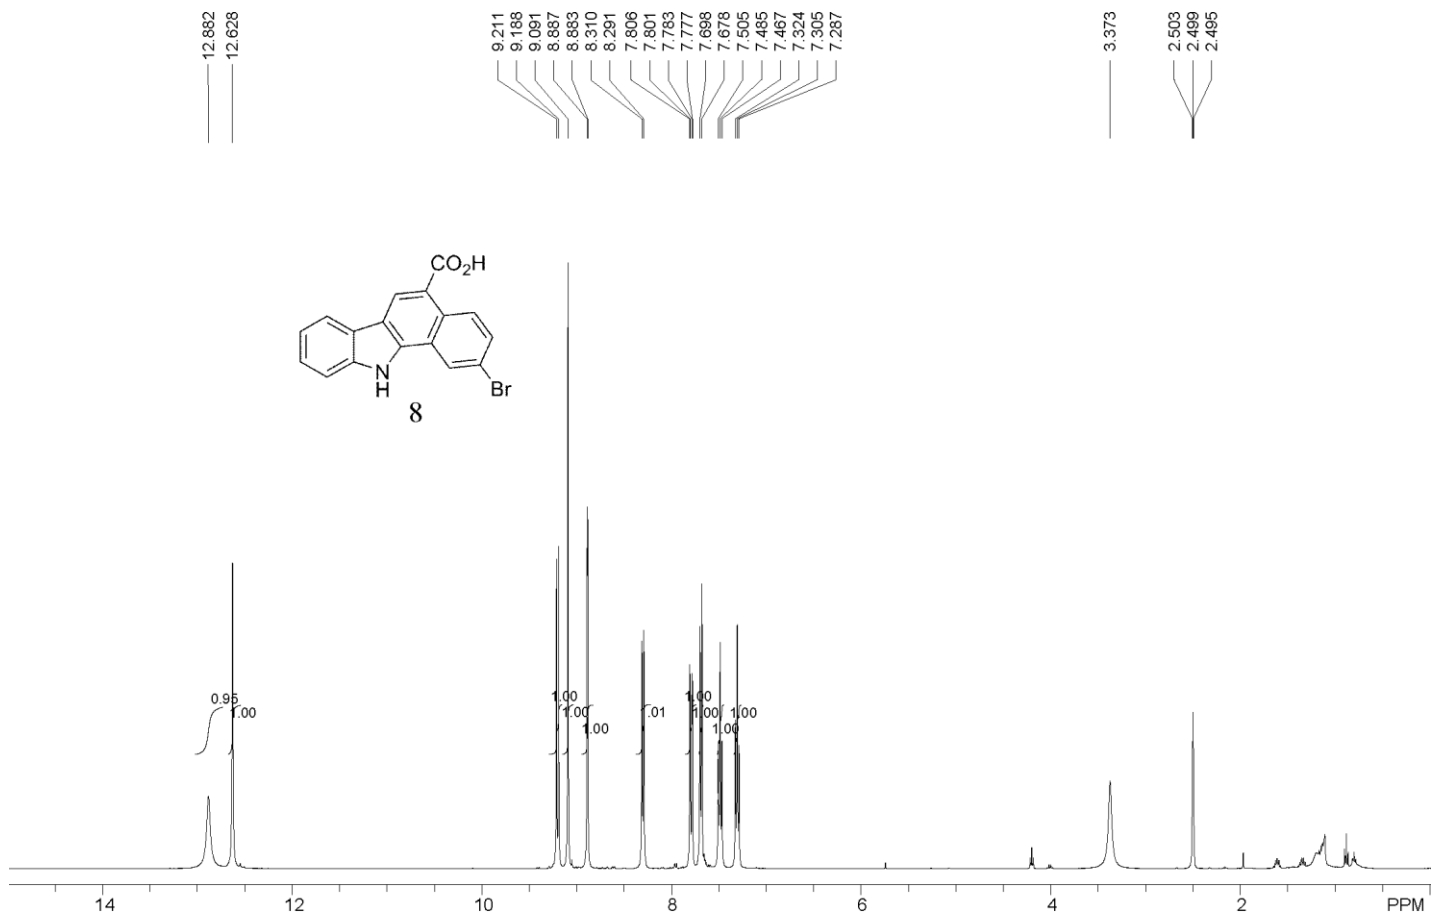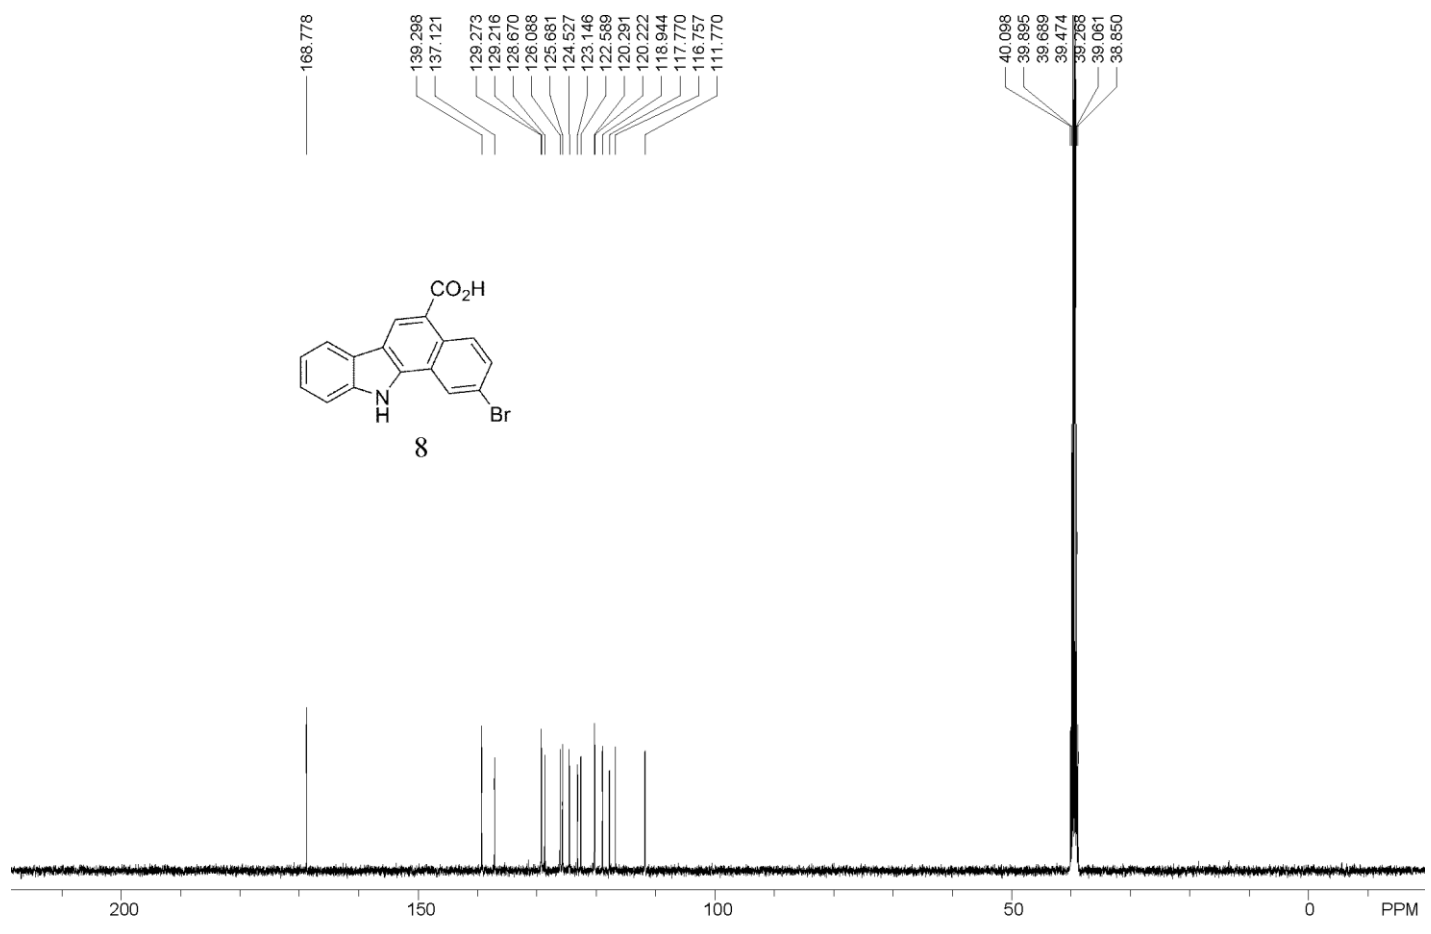



## VII. References

- (1) E. Fisher and F. Jourdan, *Ber. Dtsch. Chem. Ges.*, 1883, **16**, 2241.
- (2) Y. Jiang, V. Z. Y. Khong, E. Lourdasamy and C.-M. Park, *Chem. Commun.*, 2012, **48**, 3133.
- (3) O. E. Marvis and G. S. Patrick, *J. Org. Chem.*, 2008, **73**, 8675.
- (4) B. Li, B. Zhang, X. Zhang and X. Fan, *J. Org. Chem.*, 2016, **81**, 9530.
- (5) K.-i. Fujita, Y. Takahashi, M. Owaki, K. Yamamoto and R. Yamaguchi, *Org. Lett.*, 2004, **6**, 2785.
- (6) Y. Wang, X. Li, Q. He, Y. Chen, Y. Xie, J. Ding, Z. Miao and C. Yang, *Eur. J. Med. Chem.*, 2011, **46**  
5878.
